# Supplementary material
Source: PubMed Central journal article supplement (PMC3808661)
Supplement: 1307309110_sapp.pdf [file 1307309110_sapp.pdf]

## Supplemental Information

### Methods

#### Crystallization and diffraction

Cetuximab Fab was mixed with each meditope at a 1:10 molar ratio and screened using the Qiagen JCSG Core Suites (I-IV) at 20 °C. Co-crystals that diffracted beyond 2.2 Å were grown in 100 mM sodium phosphate/citrate, pH 4.5, 2.5 M sodium/potassium phosphate and 1.6 % w/v meso-erythritol. The crystals were wicked through 14% (w/v) meso-erythritol and flash frozen in liquid nitrogen. Diffraction data were collected at the Stanford Synchrotron Radiation Lab (SSRL), beam lines 9.1 and 11.1 at 100 K.

Parental or trastuzumab memAb Fab were mixed with Protein A and Protein L at 1:1:1 ratio and screened using the Qiagen JCSG Core Suites (I-IV) at 20 °C. Each trastuzumab Fabs was concentrated and dialyzed against 50 mM Tris pH 8.0, 25 mM NaCl. Crystals were grown by the hanging-drop vapor diffusion method using an equal volume of 1:1:1 molar ratio of 70 µM Fab, Protein A and Protein L solution and mother liquor consisting of 20 % w/v PEG 3350, 200 mM NaCl and 100 mM HEPES pH 7.2. The crystals were wicked through mother liquor containing 14% (w/v) meso-erythritol and flash frozen in liquid nitrogen. The trastuzumab memAb Fab, Protein A and Protein L solution was mixed with the cQFD meditope and crystals were screened under the same conditions observed for the memAb Fab:Protein L:Protein A co-crystal. Diffraction data were collected at SSRL and with a home source.

#### Structure refinement

Meditope-cetuximab Fab - Analysis of the diffraction data from the cQFD-Fab crystals indicated that the unit cell dimensions and space group were similar to the cetuximab Fab structure already deposited in the Protein Data Bank (1YY8) (1). The initial phases were determined by molecular replacement using the program Phaser (2) and the unliganded structure of cetuximab (pdb:1YY8 – chains A and B). Two Fabs were placed in the asymmetric unit with a Matthews Coefficient of 3.26 and solvent content of 62.4%. The Z scores (standard deviation of the solution over the mean) were 27 and 25 for the rotational search and 38 and 71 for the translational search. A third Fab fragment could not be placed (three Fabs in the asymmetric unit cell produces a reasonable Matthews coefficient of 2.18 at 43% solvent). After an initial round of refinement using the Fab only, a continuous stretch of unmodeled density consistent with the cyclic peptide was observed. The peptide was built manually into the density using Coot (3), refined in Phenix (2). The R and  $R_{Free}$  dropped accordingly. Water molecules were added during refinement using Phenix (2). For comparison, we also solved the structure of the cQYN peptide bound to the cetuximab Fab using the cQFD-Fab model. The structures have been deposited in the PDB as: 4GW1 (cQFD) and 4GW5 (cQYN).

“Apo”-parental and memAb trastuzumab Fabs and meditope-memAb trastuzumab Fab structure refinement - The initial phases were determined by molecular replacement using the program Phaser (2). First, the position of the Fab was

identified using coordinates from 1N8Z (4). Next, Protein A and Protein L were placed using coordinates from 1HEZ (5) and 1DEE. (6), respectively. The mediotope was built into the electron density manually using Coot (3) and refined as above. The structures have been deposited in the PDB as: 4HKZ (parental), 4HJG (“apo memAb”) and 4IOI (memAb with cQFD).

### References:

1. Li S, *et al.* (2005) Structural basis for inhibition of the epidermal growth factor receptor by cetuximab. *Cancer Cell* 7(4):301-311.
2. Adams PD, *et al.* (2010) PHENIX: a comprehensive Python-based system for macromolecular structure solution. *Acta Crystallogr D Biol Crystallogr* 66(Pt 2):213-221.
3. Emsley P, Lohkamp B, Scott WG, & Cowtan K (2010) Features and development of Coot. *Acta Crystallogr D Biol Crystallogr* 66(Pt 4):486-501.
4. Cho HS, *et al.* (2003) Structure of the extracellular region of HER2 alone and in complex with the Herceptin Fab. *Nature* 421(6924):756-760.
5. Graille M, *et al.* (2001) Complex between *Peptostreptococcus magnus* protein L and a human antibody reveals structural convergence in the interaction modes of Fab binding proteins. *Structure* 9(8):679-687.
6. Graille M, *et al.* (2000) Crystal structure of a *Staphylococcus aureus* protein A domain complexed with the Fab fragment of a human IgM antibody: structural basis for recognition of B-cell receptors and superantigen activity. *Proc Natl Acad Sci U S A* 97(10):5399-5404.

**Table S1.** Experimental and refinement statistics for meditope-cetuximab Fab, “apo”-parental trastuzumab and meditope- and “apo”-memAb trastuzumab crystal structures

|                                                     | Cetuximab<br>+ cQFD<br>(4GW1)                 | Cetuximab<br>+ cQYN<br>(4GW5)                 | Parental<br>Trast<br>(4HKZ)                   | Trast<br>memAb<br>(4HJG)                      | Trast<br>memAb +<br>cQFD (4IOI)               |
|-----------------------------------------------------|-----------------------------------------------|-----------------------------------------------|-----------------------------------------------|-----------------------------------------------|-----------------------------------------------|
| Data collection                                     |                                               |                                               |                                               |                                               |                                               |
| Space group                                         | P2 <sub>1</sub> 2 <sub>1</sub> 2 <sub>1</sub> |
| Cell dimensions                                     |                                               |                                               |                                               |                                               |                                               |
| <i>a</i> , <i>b</i> , <i>c</i> (Å)                  | 64.26<br>82.58<br>211.63                      | 64.16<br>82.52<br>211.88                      | 53.52<br>104.67<br>117.55                     | 53.31<br>104.98<br>117.82                     | 53.31<br>105.11<br>117.62                     |
| $\alpha$ , $\beta$ , $\gamma$ (°)                   | 90, 90, 90                                    | 90, 90, 90                                    | 90, 90, 90                                    | 90, 90, 90                                    | 90, 90, 90                                    |
| Resolution (Å)                                      | 19.85-2.24<br>(2.30-2.24)*                    | 29.61-2.20<br>(2.26-2.20)*                    | 47.81-2.08<br>(2.13-2.08)*                    | 33.50-2.00<br>(2.05-2.00)*                    | 33.58-1.95<br>(2.00-1.95)*                    |
| <i>R</i> <sub>merge</sub>                           | 0.078<br>(0.50)*                              | 0.067<br>(0.26)*                              | 0.076<br>(0.470)*                             | 0.055<br>(0.266)*                             | 0.047<br>(0.452)*                             |
| <i>I</i> / $\sigma$ <i>I</i>                        | 17.0 (3.1)*                                   | 25.5 (6.0)*                                   | 14.4 (3.1)*                                   | 24.8 (5.8)*                                   | 23.6 (3.35)*                                  |
| Completeness (%)                                    | 97.4 (83.3)*                                  | 99.9 (100)*                                   | 99.0 (92.3)*                                  | 97.6 (90.7)*                                  | 91.7 (98.4)*                                  |
| Redundancy                                          | 4.2 (3.2)*                                    | 7.9 (8.2)*                                    | 4.2 (3.2)*                                    | 4.7 (4.4)*                                    | 4.5 (4.4)*                                    |
| Refinement                                          |                                               |                                               |                                               |                                               |                                               |
| Resolution (Å)                                      | 19.85-2.24                                    | 29.61-2.20                                    | 47.81-2.08                                    | 33.50-2.00                                    | 33-58-1.95                                    |
| No. reflections                                     | 53791                                         | 58047                                         | 40076                                         | 44427                                         | 44750                                         |
| <i>R</i> <sub>work</sub> / <i>R</i> <sub>free</sub> | 18.2/22.6                                     | 17.4/22.2                                     | 16.4/20.7                                     | 15.3/19.5                                     | 17.3/20.2                                     |
| No. atoms                                           |                                               |                                               |                                               |                                               |                                               |
| Protein                                             | 6602                                          | 6528                                          | 4306                                          | 4352                                          | 4326                                          |
| Meditope/ion                                        | 200/15                                        | 188/15                                        | 0/1                                           | -/-                                           | 97/-                                          |
| Water                                               | 581                                           | 618                                           | 557                                           | 733                                           | 541                                           |
| <i>B</i> -factors                                   |                                               |                                               |                                               |                                               |                                               |
| Protein                                             | 31.4                                          | 32.0                                          | 28.7                                          | 20.4                                          | 26.2                                          |
| Meditope/ion                                        | 50.3/67.4                                     | 64.0/44.2                                     | -/31.3                                        | -/-                                           | 28.9/-                                        |
| Water                                               | 37.5                                          | 38.7                                          | 36.8                                          | 33.6                                          | 34.8                                          |
| R.m.s. deviations                                   |                                               |                                               |                                               |                                               |                                               |
| Bond lengths (Å)                                    | 0.004                                         | 0.007                                         | 0.007                                         | 0.007                                         | 0.007                                         |
| Bond angles (°)                                     | 0.913                                         | 1.100                                         | 1.066                                         | 1.065                                         | 1.090                                         |
| Ramachandran<br>favored/disallowed                  | 97.3/0.0                                      | 97.8/0.0                                      | 99.1/0.0                                      | 98.6/0.0                                      | 98.4/0.0                                      |

\* Last shell

**Table S2.** Buried Surface Area of Select Fab Binding Proteins

| Protein/ Peptide | Buried surface area ( $\text{\AA}^2$ ) | Protein Data Bank ID |
|------------------|----------------------------------------|----------------------|
| cQFD             | 904                                    | -                    |
| cQYN             | 787                                    | -                    |
| Protein A        | 580                                    | 1DEE                 |
| Protein L        | 714 (646)*                             | 1HEZ                 |
| Protein G        | 518 (184)*                             | 1QKZ                 |

\* Buried surface area of secondary binding sites.

**Table S3.** Dissociation constants of mediotope variants as determined by SPR

| Ligand                | $K_D$ ( $\mu\text{M}$ ) |
|-----------------------|-------------------------|
| cQFDLSTRRLKc          | 0.43                    |
| cQ <b>A</b> DLSTRRLKc | 34                      |
| cQFD <b>A</b> STRRLKc | 57                      |
| cQFDLST <b>A</b> RLKc | 140                     |
| cQFDKSTRR <b>A</b> Kc | 2.2                     |

\* Mutated residue is bolded in red.

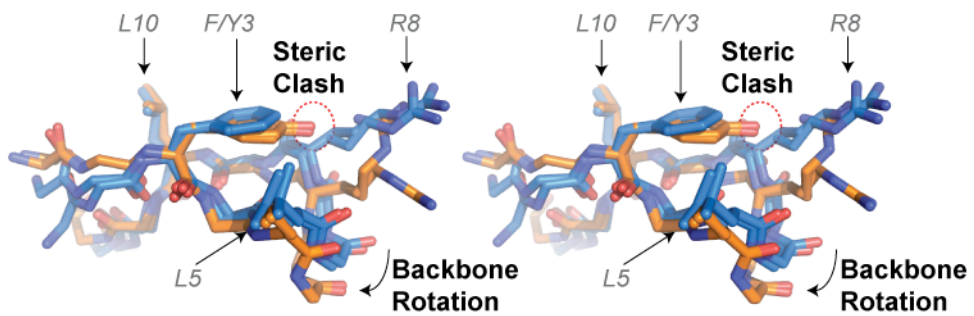

**Figure S1.** Mediotope binding pocket of cetuximab. Stereoview overlay of cQFD (blue carbons) and cQYN (orange carbons) bound to cetuximab Fab. The hydrophobic side chains of Phe/Tyr3, Leu5 and Leu10 of the two mediotopes overlap and maintain a similar interaction with the Fab.

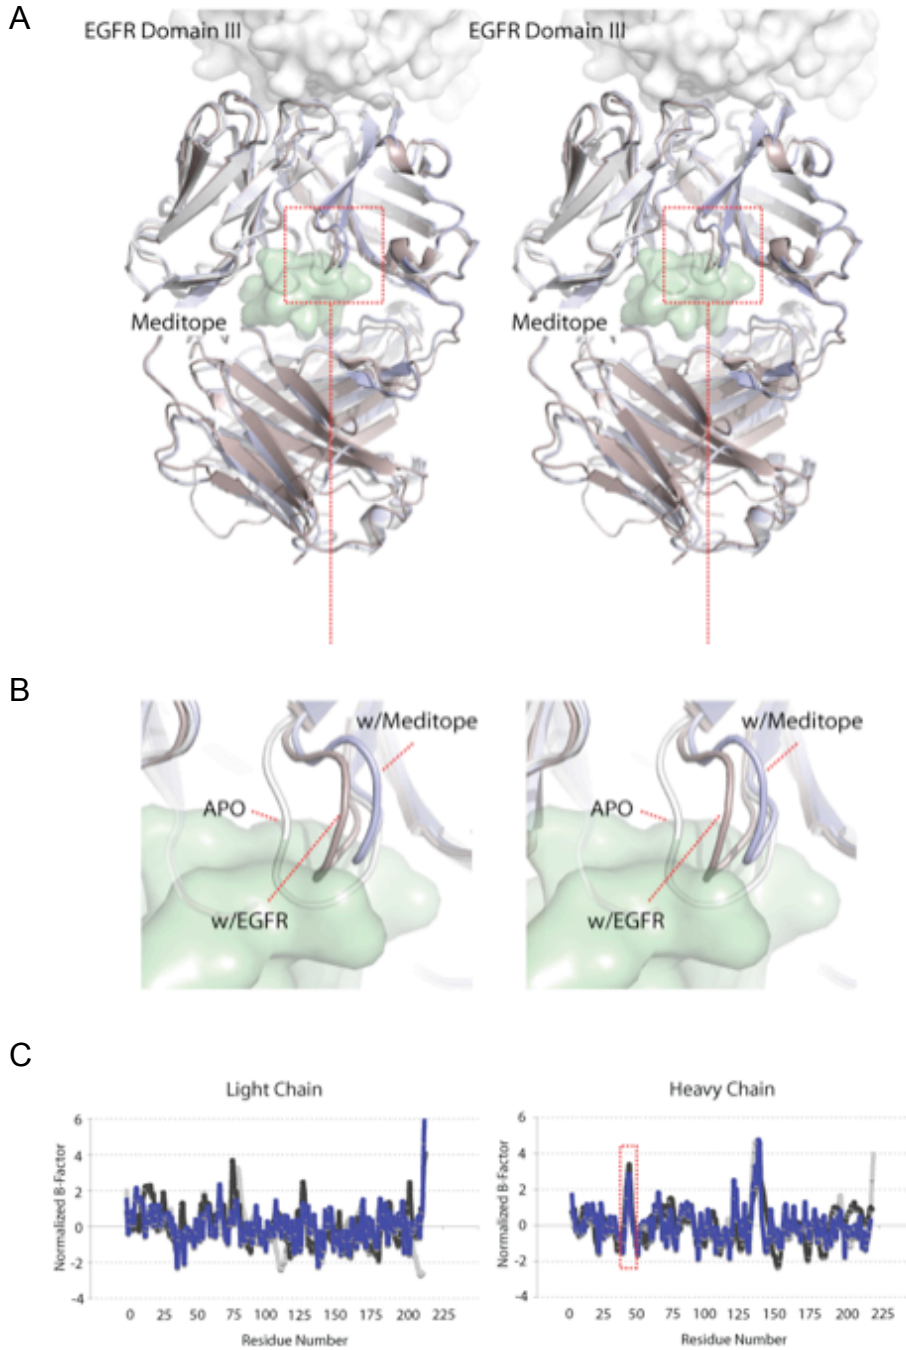

**Figure S2.** Overall structure of cetuximab is unperturbed by meditope binding. (A) Superposition of EGFR-Fab (red) and cQFD meditope-Fab (blue). (B) Enlarged view of the meditope binding site, showing the framework loop2 (residues 39–44) position shifts. (C) B-factors of apo- (grey), EGFR-liganded (black), and meditope-liganded cetuximab Fab (blue) are plotted as a function of residue number. Residues 36–46 of the heavy chain are boxed in red.

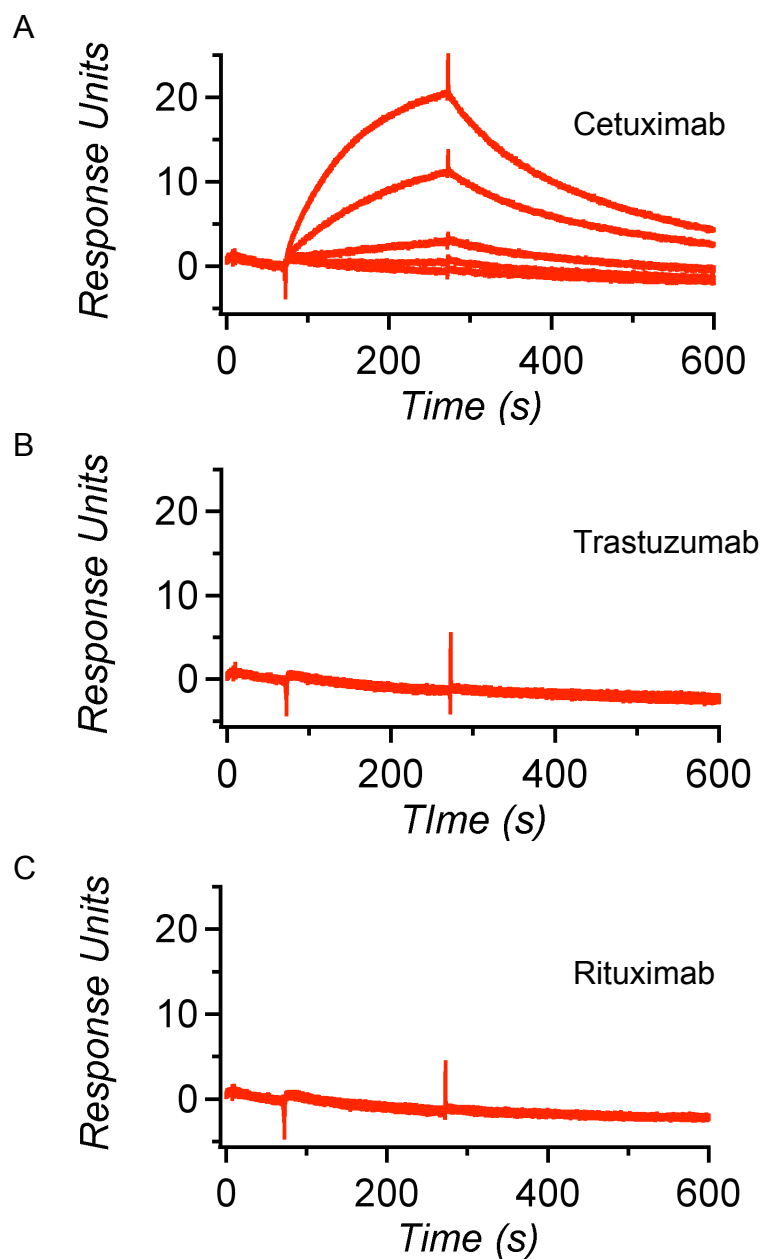

**Figure S3.** SPR sensograms of (A) cetuximab, (B) trastuzumab and (C) rituximab IgG interactions with immobilized, synthetic cQFD mediotope ligand at 25 °C. Analyte concentrations are 0, 10, 100, 500 and 1000 nM.

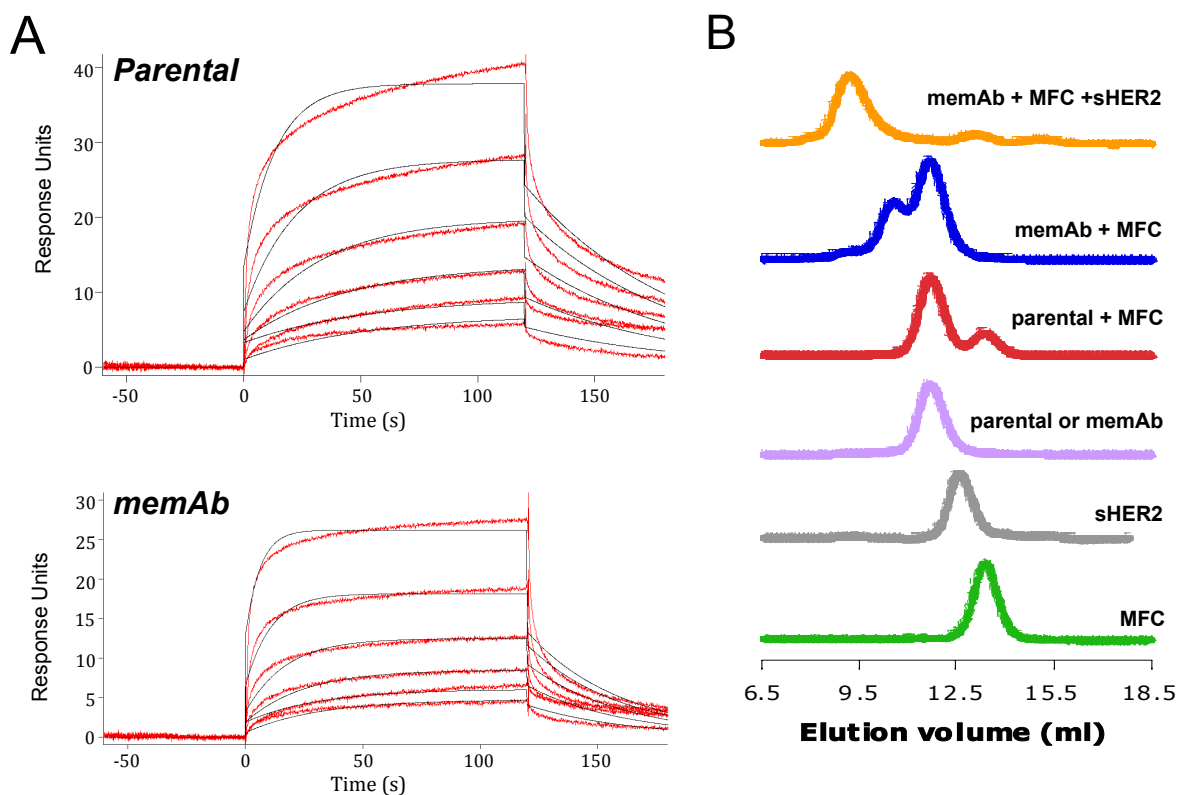

**Figure S4:** (A) SPR sensograms of parental trastuzumab Fab (top) and meditope enabled trastuzumab (memAb) Fab (bottom) comparing the binding kinetics of each to immobilized sHER2. (B) Size exclusion chromatography of parental or memAb trastuzumab Fabs, sHER2, and meditope-Fc (MFC), Also shown are admixtures of MFC with each trastuzumab Fab, and admixture of sHER2, MFC and memAb Fab.



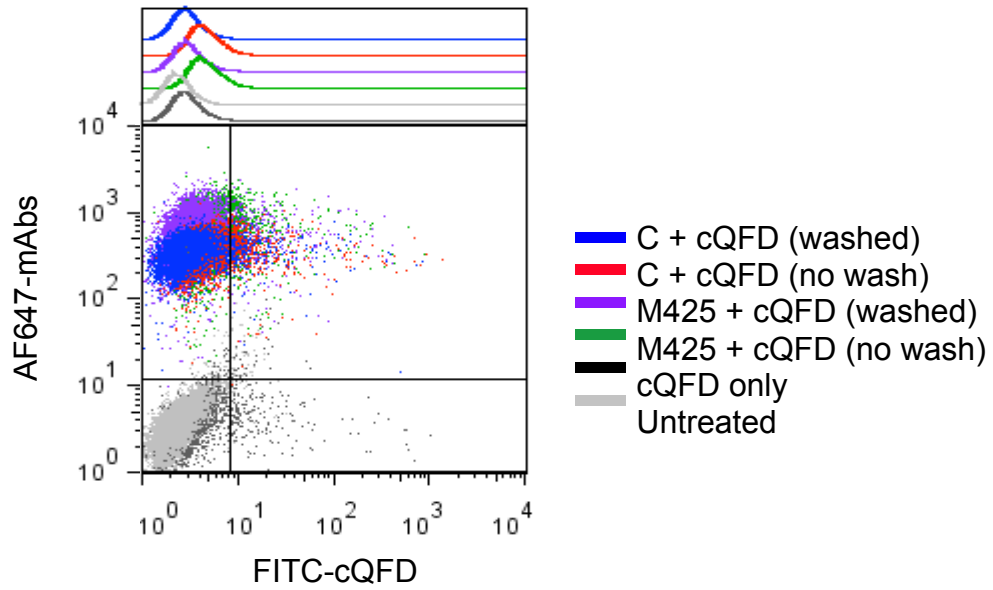

**Figure S5.** Monomeric meditope has weak affinity to cetuximab pre-labeled cells. Cetuximab (C) or M425 were preincubated with MDA-MB-468 cells. 3  $\mu$ M of monomeric meditope (cQFD) were added, and were either washed or not washed before proceeding to FACS analysis.

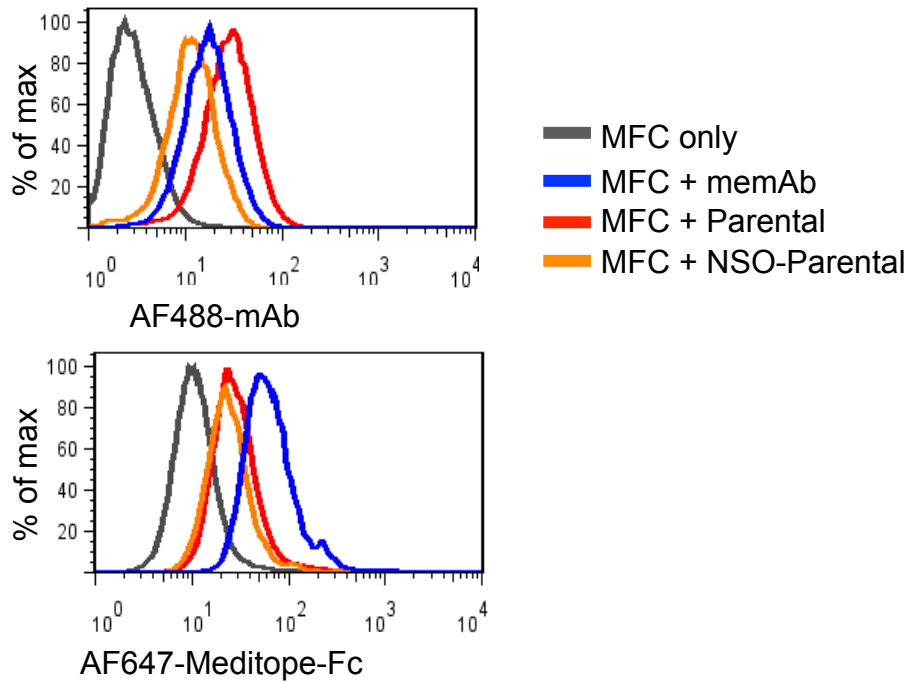

**Figure S6.** Meditope-enabling mutations did not interfere with antigen recognition. Commercial trastuzumab (Parental), trastuzumab produced from NS0 cells (NS0-Parental) and memAb trastuzumab (memAb) were labeled with Alexa Fluor 488 and applied to SKBR3 cells (top panel). Alexa Fluor 647-meditope-Fc (MFC) were then applied after excess mAbs were washed off. The three mAbs bound to cells in the same range, but only memAb labeled cells have enhanced MFC binding.

Alignment S1  
accession #

Aligned sequence

---

|          |    |                                                                                                            |     |
|----------|----|------------------------------------------------------------------------------------------------------------|-----|
| Cetux.   | 26 | SQS-I-G-T-----NIHWYQQR <sup>T</sup> NGSPRLLIKYASE----SISGIPSRFSGS--GSGTDFTLTIS-SVESEDIAD <sup>D</sup> YYCQ | 89  |
| Ch14.18  | 26 | SQSLVHRNGNTYLHWYLHWYLQKPGQSPKLLIHKVSN----RFSGVPRFSGS--GSGTDFTLKIS-RVEAEDLGVIYFCS                           | 89  |
| Trast.   | 26 | SQD-V-N-T-----AVAWYQKPKGKAPKLLIYSASF----LYSGVPSRFSGS--RSGTDFTLTIS-SLQPEDFATYYCQ                            | 89  |
| Ritux.   | 26 | SSS-V--S-Y-----IHWYQKPKGSSPKWIYATSN----LASGVPVRFSGS--GSGTSYSLTIS-RVEAEDAATYYCQ                             | 89  |
| M425     | 26 | SSS-V--T-Y-----MYWYQKPKGSSPRLLIYDTSN----LASGVPVRFSGS--GSGTSYSLTIS-RMEAEDAATYYCQ                            | 89  |
| BAH03696 | 26 | SQS-I---SS--N---FAWYQKPKGQSPRLLIYGAST----RATGIPARFSGS--GSGTEFTLTIS-SLQSEDFAVYYCQ                           | 89  |
| 3D85_A   | 26 | SQS-I-S-D-----YLHWYRQKSHESPRLLIKYASQ----SISGIPSRFSGS--GSGSDFTLTIS-SVEPEDVGVYYCQ                            | 89  |
| BAB18257 | 26 | SQS-V---SS--Y---LAWYQKPKGQAPRLLINDASN----RATGIPARFSGS--GSGTDFTLTIS-SLEPEDFVYYCQ                            | 89  |
| BAC01759 | 48 | SQS-V---SSN-----LAWYQKPKGQAPRLLIYGAST----RATGIPARFSGS--GSGTEFTLTIS-SLQSEDFAVYYCQ                           | 111 |
| AAH30813 | 46 | SQS-V---TS--N---LAWYQQT <sup>T</sup> PGQSPRLVIYASS----RASGVPARFSGS--GSGTEFTLTIS-SLQSEDFAVYYCQ              | 109 |
| 3GIZ_L   | 26 | SQS-V---SS--Y---LAWYQKPKGQAPRLLIYDASN----RATGIPARFSGS--GSGTDFTLTIS-SLEPEDFVYYCQ                            | 89  |
| BAC01747 | 48 | SQS-V---SSN-----LAWYQKPKGQAPRLLIYGAST----RATGIPARFSGS--GSGTEFTLTIS-SLQSEDFAVYYCQ                           | 111 |
| BAC01743 | 48 | SQS-V---SSN-----LAWYQKPKGQAPRLLIYGAST----RATGIPARFSGS--GSGTEFTLTIS-SLQSEDFAVYYCQ                           | 111 |
| BAA33580 | 26 | SQS-V---RS--N---LAWYQKPKGQAPRLLIYAAS <sup>T</sup> ----RATGIPARFSGS--GSGTEFTLTIS-SLQSEDFAVYYCQ              | 89  |
| BAC53922 | 26 | SQS-V---NN--Y---LAWYQKPKGQAPRLLIYDASN----RATGIPARFSGS--GSGTDFTLTIS-SLEPEDFVYYCQ                            | 89  |
| AAB86466 | 48 | SQS-V---RS--N---LAWYQKPKGQAPRLLIYAAS <sup>T</sup> ----RATGIPARFSGS--GSGTEFTLTIS-SLQSEDFAVYYCQ              | 111 |
| BAH03697 | 26 | SQS-V---SSN-----LAWYQKPKGQAPRLLIYGAST----RATGIPARFNGG--GSGTDFTLTIS-SPQSENFAVYHCQ                           | 89  |
| BAC01744 | 48 | SQS-V---SSN-----LAWYQKPKGQAPRLLIYGAST----RATGIPARFSGS--GSGKEFTLTIS-SLQSEDFAVYYCQ                           | 111 |
| BAF48994 | 26 | SQS-V---GS--N---LAWYRQKPKGQAPRLLMYGAST----RVAGVPARFSGS--GSGTDFTLTIS-NLQSEDFAVYYCQ                          | 89  |
| JE0244   | 26 | SQS-V---HS--N---LAWYQKPKGQAPRLLIYR <sup>A</sup> ST----RATGIPARFSGS--GSGTDFILTIS-SLQSEDFALYYCQ              | 89  |
| 2VXV_L   | 26 | SES-I---SS--N---LAWYQKPKGQAPR <sup>L</sup> FIY <sup>A</sup> ST----RATDIPARFSGS--GSGTEFTLTIS-SLQSEDFAVYYCQ  | 89  |
| JE0243   | 26 | SQS-V---AT--N---VWVYMQKLGQAPRLLIYD <sup>A</sup> ST----RATGVPARFSGS--GSGTEFTLTIS-SLQSEDFAIYYCQ              | 89  |
| 3EYQ_C   | 27 | SQS-V---SS--Y---LAWYQKPKGQAPRLLIYDASN----RATGIPARFSGS--GSGTDFTLTIS-SLEPEDFVYYCQ                            | 90  |
| BAC01696 | 48 | SQS-V---SS-----YLAWYQKPKGQAPRLLIYDASN----RATGIPARFSGS--GSGTDFTLTIS-SLEPEDFVYYCQ                            | 111 |
| 1RZ8_A   | 26 | SES-V---SS--D---LAWYQKPKGQAPRLLIYGAST----RATGVPARFSGS--GSGAEFTLTIS-SLQSEDFAVYYCQ                           | 89  |
| 1I9R_L   | 26 | SQR-V-S-SST-Y-SYMHWYQKPKGQPPKLLIKYASN----LESGVPARFSGS--GSGTDFTLTIS-SVEPEDFATYYCQ                           | 93  |
| 3KYK_L   | 26 | SQS-V---SS--Y---LAWYQKPKGQAPRLLIYDASN----RATGIPARFSGS--GSGTEFTLTIS-SLQSEDFAVYYCQ                           | 89  |
| 3L5X_L   | 26 | SKS-I---SK--Y---LAWYQKPKGQAPRLLIYSGST----LQSGIPARFSGS--GSGTDFTLTIS-SLEPEDFVYYCQ                            | 89  |
| 3F12_A   | 27 | SQS-V---SS--Y---LAWYQKPKGQAPRLLIYDASN----RATGIPARFSGS--GSGTDFTLTIS-SLEPEDFVYYCQ                            | 90  |
| BAC01752 | 48 | SQS-V---SSN-----LAWYQKPKGQAPRLLIYGAST----RATGIPARFSGS--GSGTEFTLTIS-SLQSEDFAVYYCQ                           | 111 |
| BAC01756 | 48 | SQS-V---SSN-----LAWYQKPKGQAPRLLIYGAST----RATGIPARFSGS--GSGTEFTLTIS-SLQSEDFAVYFCQ                           | 111 |
| BAK48745 | 26 | SQS-V---SS--Y---LAWYQKPKGQAPRLLIYDASN----RATGIPARFSGS--GSGTDFTLTIS-SLEPEDFVYYCQ                            | 89  |
| ACF34453 | 26 | SLS-V---SG--N---LAWYQKPKGQAPRLLINGAST----GAAGVPARFSGS--GFGTEFTLTIS-SLQSEDFAVYYCQ                           | 89  |
| BAB18251 | 26 | SQS-V---SS--Y---LAWYQKPKGQAPRLLIYDASN----RATGIPVRFSGS--GSGTDFTLTIS-SLEPEDFVYYCL                            | 89  |
| BAC01749 | 48 | SQS-V---SSN-----LAWYQKPKGQAPRLLIYGAST----RATGIPARFSGS--GSGTEFTLTIS-SLQSEDFAVYYCQ                           | 111 |
| 3B2U_L   | 26 | SQS-V---SS--Y---LAWYQKPKGQAPRLLIYDASN----RATGIPARFSGS--GSGTDFTLTIS-SLEPEDFVYYCH                            | 89  |
| AAO17825 | 46 | SQT-A---SR--Y---LAWYQKPKGQAPRLLIYDTSN----RATGIPARFSGS--GSGTDFTLTIS-SLEPEDFVYYCQ                            | 109 |
| 3EYF_A   | 27 | SQS-V---GG--Y---LTWYQHKPGQAPRLLIFDASI----RATGIPARFSGS--GSGTDFTLTIT-RLEPEDFVYYCQ                            | 90  |
| BAC01737 | 48 | SQS-V---SS-----YLAWYQKPKGQAPRLLIYDASN----RATGIPARFSGS--GSGTDFTLTIS-SLEPEDFVYYCQ                            | 111 |
| 3FN0_L   | 24 | SQS-V---GR--N---LGWYQKPKGQAPRLLIYDASN----RATGIPARFSGS--GSGTDFTLTIS-SLEPEDFVYYCQ                            | 87  |
| 1GC1_L   | 26 | SES-V---SS--D---LAWYQKPKGQAPRLLIYGAST----RATGVPARFSGS--GSGAEFTLTIS-SLQSEDFAVYYCQ                           | 89  |
| 1G9M_L   | 26 | SES-V---SS--D---LAWYQKPKGQAPRLLIYGAST----RATGVPARFSGS--GSGAEFTLTIS-SLQSEDFAVYYCQ                           | 89  |
| AAB20217 | 26 | SQS-V---SY--N---LAWYQKPKGQAPRLLIYSTSI----RATGIPARFSGS--GSETEFTLTIS-ILQSEDFAVYYCQ                           | 89  |
| 3NCJ_L   | 26 | SQS-I-----G-LYLAWYQKPKGKAPKLLIYAASS----LQSGVPSRFSGS--GSGTDFTLTIS-SLQPEDFATYYCQ                             | 89  |

|          |     |                                                                                  |     |
|----------|-----|----------------------------------------------------------------------------------|-----|
| ABG79005 | 24  | SQN-I---GT--W---LAWFQQKPGQTPRLLIYDASK----RAAGIPARFSGS--GSGTDFTLTIN-SLEAEDFAVYYCQ | 87  |
| 3L5Y_L   | 26  | SKS-I---SK--Y---LAWYQQKPGQAPRLLIYSGST----LQSGIPARFSGS--GSGTDFTLTIS-SLEPEDFAVYYCQ | 89  |
| AAA73002 | 159 | SQS-V---GS--Y---LAWYQQKPGQAPRPLIYDASN----RATGIPARFSGS--GSGTDFTLTIS-SLEPEDFAVYYCQ | 222 |
| 3HC3_L   | 26  | SQN-V-----G-INVAWYQQKPGKAPKLLISSASY----RYSGVPSRFSGS--GSGTDFTLTIS-SLQPEDFATYFCQ   | 89  |
| 2WUB_L   | 26  | SQD-V-----S-TAVAWYQQKPGKAPKLLIYSASF----LYSGVPSRFSGS--GSGTDFTLTIS-SLQPEDFATYFCQ   | 89  |
| BAA97671 | 26  | SQS-I-----S-SYLNWYQQKPGKAPKLLIYAASS----LQSGVPSRFSGS--GSGTDFTLTIS-SLQPEDLATYFCQ   | 89  |
| BAF64543 | 26  | SQS-V---SSS-Y---LAWYQQKPGQAPRLLIYDASN----RATGIPDRFSGS--GSGTDFTLTIN-RLEPEDFAVYYCQ | 90  |
| 2FJH_L   | 26  | SQV-I-----R-RSLAWYQQKPGKAPKLLIYAASN----LASGVPSRFSGS--GSGTDFTLTIS-SLQPEDFATYFCQ   | 89  |
| 3NA9_L   | 26  | SQS-I-----G-LYLAWYQQKPGKAPKLLIYAASS----LQSGVPSRFSGS--GSGTDFTLTIS-SLQPEDFATYFCQ   | 89  |
| 2V7N_A   | 26  | SQS-V---SSN-Y---LAWYQQKPGQAPRLLIYDSSS----RATGVPARFSGS--GSGTDFTLTIS-SLEPEDFAVYYCH | 90  |
| 3HC0_L   | 26  | SQN-V-----G-INVAWYQQKPGKAPKLLISSASY----RYSGVPSRFSGS--GSGTDFTLTIS-SLQPEDFATYFCQ   | 89  |
| 1VGE_L   | 26  | SQG-I-----S-SALAWYQQKPGKAPRLLIYDASN----LESGVPSRFSGS--GSGTDFTLTIS-SLQPEDFAIYYCQ   | 89  |
| 3FCT_A   | 26  | SQN-V-----G-TPVAWYQQKPGQSPKLLIYSASN----RYTGVDRFTGS--GSGTDFTLTIS-NMQSEDLADYFCQ    | 89  |
| 3BN9_C   | 26  | SQG-I-----S-SYLAWYQQKPGKAPKLLIYAASS----LQSGVPSRFSGS--GSGTDFTLTIS-SLQPEDFAVYYCQ   | 89  |
| BAC01706 | 48  | SQS-I-----S-SWLAWYQQKPGKAPKLLIYKASS----LESGVPSRFSGS--GSGTEFTLTIS-SLQPEDFATYFCQ   | 111 |
| BAC01768 | 48  | SQG-I-----S-SYLAWYQQKPGKAPKLLIYAASST----LQSGVPSRFSGS--GSGTDFTLTIS-SLQPEDFATYFCQ  | 111 |
| ABU90613 | 26  | SQG-I-----G-TWLAWYQQRPKAPPELLIYSASS----LQGGVPSRFSGS--GSGTDFTLTIS-SLQAEEDFATYFCQ  | 89  |
| BAF64542 | 26  | SQS-V---SSS-Y---LAWYQQKPGQAPRLLIYDASN----RATGIPDRFSGS--GSGTDFTLTIS-RLEPEDFAVYYCQ | 90  |
| 1QLR_A   | 26  | SQS-V---SSN-Y---LAWYQQKPGQAPRLLIYDASS----RATGIPDRFSGS--GSGTDFTLTIS-RLEPEDFAVYYCQ | 90  |
| BAF64541 | 26  | SQS-V---SSS-Y---LAWYQQKPGQAPRLLIYDASN----RATGIPDRFSGS--GSGTDFTLTIS-RLEPEDFAVYYCQ | 90  |
| 1B4J_L   | 26  | SEN-V-----D-TYVSWYQQKPEQSPKLLIYGASN----RYTGVDRFTGS--GSATDFTLTIS-SVQAEDLADYHCG    | 89  |
| BAC01673 | 48  | SQG-I-----S-SWLAWYQQKPGKAPKLLIYAASS----LQSGVPSRFSGS--GSGTDFTLTIS-SLQPEDFATYFCQ   | 111 |
| BAC80155 | 26  | SQS-I-----S-SYLNWYQQRPQAPKLLIYAASS----LQSGVPSRFSGS--GSGTDFTLTIS-SLQPEDFATYFCQ    | 89  |
| 3P0V_L   | 26  | SQD-L-----A-TDVAWYQQKPGKAPKLLIYSASF----LYSGVPSRFSGS--GSGTDFTLTIS-SLQPEDFATYFCQ   | 89  |
| BAC01726 | 48  | SQS-I-----S-SYLNWYQQKPGKAPKLLIYAASS----LQSGVPSRFSGS--GSGTDFTLTIS-SLQPEDFATYFCQ   | 111 |
| BAC01728 | 48  | SQS-I-----S-SWLAWYQQKPGKAPKLLIYKASS----LESGVPSRFSGS--GSGTDFTLTIS-SLQPEDFATYFCQ   | 111 |
| 3SOB_L   | 49  | SQD-V-----S-TAVAWYQQKPGKAPKLLIYSASF----LYSGVPSRFSGS--GSGTDFTLTIS-SLQPEDFATYFCQ   | 112 |
| 3E09_L   | 26  | SKT-I-----S-KYLAWYQQKPGKAPKLLIYSGST----LQSGVPSRFSGS--GSGTDFTLTIS-SLQPEDFATYFCQ   | 89  |
| BAC01671 | 48  | SQS-V-----T-SYLNWYQQKPGKAPKLLIYAASS----LQSGVPSRFSGS--GSGTEFTLTIS-SLQPEDFATYFCQ   | 111 |
| BAC01725 | 48  | SQS-I-----S-SYLNWYQQKPGKAPKLLIYAASS----LQSGVPSRFSGS--GSGTDFTLTIS-SLQPEDLATYFCQ   | 111 |
| 3N85_L   | 26  | SQS-V-----S-SAVAWYQQKPGKAPKLLIYSASS----LYSGVPSRFSGS--RSGTDFTLTIS-SLQPEDFATYFCQ   | 89  |
| BAF48998 | 26  | SQD-I-----S-SWLAWYQQKPGKAPKLLIYAASST----LQSGVPSRFSGS--GSGTDFSLTIN-SLQPEDFATYFCQ  | 89  |
| 2FJF_L   | 26  | SQD-V-----S-TAVAWYQQKPGKAPKLLIYSASF----LYSGVPSRFSGS--GSGTDFTLTIS-SLQPEDFATYFCQ   | 89  |
| 1DEE_A   | 26  | SQS-I-----S-SYLNWYQQKPGKAPKLLIYAASS----LQSGVPSRFSGS--GSGTDFTLTIS-SLQPEDFATYFCQ   | 89  |
| BAC01757 | 48  | SQS-V---SS-----YLAWYQQKPGQAPRLLIYDASN----RATGIPARFSGS--GSGTDFTLTIS-SLEPEDFAVYYCQ | 111 |
| 1HEZ_A   | 26  | SQS-I-----S-SYLNWYQQKPGKAPKLLIYAASS----LQSGVPSRFSGS--GSGTDFTLTIS-SLQPEDFATYFCQ   | 89  |
| 2R56_L   | 26  | SQG-I-----S-SRLAWYQQKPGKAPKLLIYAASS----LQSGVPSRFSGS--GSGTEFTLTIS-SLQPEDFATYFCQ   | 89  |
| 3HI5_L   | 27  | SQS-I-----G-SYLNWYQQTKGAPKLLIYAASS----LQSGVPSRFSGS--GSGTDFTLTIS-SLQLEDFATYFCQ    | 90  |
| 2HFF_A   | 26  | SQD-V-----S-TAVAWYQQKPGKAPKLLIYSASF----LYSGVPSRFSGS--GSGTDFTLTIS-SLQPEDFATYFCQ   | 89  |
| 3IU4_L   | 26  | SQD-V-----S-TAVAWYQQKPGQSPKLLIYSASY----RYTGVDRFTGS--GSGTDFTLTIS-SVQAEDLAVYYCQ    | 89  |
| 2HFG_L   | 26  | SQD-V-----S-TAVAWYQQKPGKAPKLLIYSASF----LYSGVPSRFSGS--GSGTDFTLTIS-SLQPEDFATYFCQ   | 89  |
| BAC01709 | 48  | SQD-I-----S-NYLNWYQQKPGKAPKLLIYDASN----SETGVPSRFSGS--GSGTDFTLTIS-SLQPEDIATYFCQ   | 111 |
| BAC01766 | 48  | SQS-I-----S-SYLNWYQQKPGKAPKLLIYAASS----LQSGVPSRFSGS--GSGTDFTLTIS-SLQPEDFATYFCQ   | 111 |
| 1ZA6_A   | 26  | SQS-LLY-SGN-QKNYLAWYQQKPGQSPKLLIYWASA----RESGVDRFSGS--GSGTDFTLTIS-SVQAEDVAVYYCQ  | 95  |
| ACF34418 | 26  | SQS-I-----G-SWLWVYQQTAGKAPKLLIYASST----LQSGVPSRFSGS--GSGTDFTLTIN-SLQPEDFATYFCQ   | 89  |
| 1U6A_L   | 26  | SQS-V---SSR-Y---LAWYQQKPGQAPRLLIYDASN----RATGIPDRFSGS--GSGTDFTLTIS-RVEPEDFAVYYCQ | 90  |
| 3HMW_L   | 26  | SQG-I-----S-SWLAWYQQKPEKAPKSLIYAASS----LQSGVPSRFSGS--GSGTDFTLTIS-SLQPEDFATYFCQ   | 89  |

1RZG\_B 26 SQS-I-----S-NWLAWYQOKPGRAPKLLMYKASS----LKSGVPSRFRSGS--GSGTEFTLTIS-SLQSDDFATYYCQ 89  
AAS01771 48 SQG-I-----S-NYLAWYQOKPGKVPKLLIYAASST----LQSGVPSRFRSGS--GSGTDFTLTIS-SLQPEDVATYYCQ 111  
3U30\_B 26 SQD-V-----S-TAVAWYQOKPGKAPKLLIYSAKF----LYSGVPSRFRSGS--GSGTDFTLTIS-SLQPEDFATYYCQ 89  
3QEG\_L 26 SQS-V---SSS-Y---LAWYQOKPGQAPRLLIYGASS----RATGIPDRFRSGS--GSGTDFTLTIS-RLEPEDFAVYYCQ 90  
BAC01736 48 SQS-V---SSS---YLAWYQOKPGQAPRLLIYGASS----RATGIPDRFRSGS--GSGTDFTLTIS-RLEPEDFAVYYCQ 112  
BAC01727 48 SQS-I-----S-SYLNWYQOKPGKAPKLLIYAASS----LQSGVPSRFRSGS--GSGTDFTLTIS-SLQPEDFATYYCQ 111  
BAC01679 48 SQS-I-----S-SYLNWYQOKPGKAPKLLIYAASS----LQSGVPSRFRSGS--GSGTDFTLTIS-SLQPEDFATYYCQ 111  
BAB18261 26 SQS-I-----R-SYLSWYQOKPGKAPKLLIYAASS----LQSGVPSRFRSGS--GSGTDFTLTIS-SLQPEDFATYYCQ 89  
ACF34419 26 SQS-I-----S-TWLAWYQOKPGKAPKLLIYKAST----LESGVPSNFRSGS--GSGTEFTLTIS-SLQPDQFATYYCQ 89  
3L5W\_L 26 SKS-I-S-K-----YLAWYQEKPGKTNKLLIYSGST----LQSGIPSRFRSGS--GSGTDFTLTIS-SLEPEDFAMYFCQ 89  
BAA37169 26 SQS-I-----S-SYLNWYQOKPGKAPKLLIYAASS----RATGIPDRFRSGS--GSGTDFTLTIS-RLEPEDFAVYYCQ 89  
AAM46660 18 SQS-I-G-S-----SLHWYQOKPDQSPKLLIYASQ----SFGVPSRFRSGS--GSGTDFTLTIN-SLEAEDAATYYCH 81  
3MXV\_L 26 SQS-V-----S-NDLTWYQOKPGQSPKLLIYASN----RYTGVDRFRFTGS--GYGTDFFTTIS-TVQAEDLAVYFCQ 89  
3PGF\_L 27 SQS-V-----S-SAVAWYQOKPGKAPKLLIYASASS----LYSGVPSRFRSGS--RSGTDFTLTIS-SLQPEDFATYYCQ 90  
BAC01670 48 SQS-I-----T-NYLNWYQOKPGKAPNLLIYAASS----LQSGVPSRFRSGS--GSGTDFTLTIS-SLQPEDFATYYCQ 111  
AAS01772 48 SQG-I-----S-SWLAWYQOKPGKAPKLLIYDASS----LQSGVPSRFRSGS--GSGTDFTLTIS-SLQPEDFATYYCQ 111  
2AGJ\_L 26 SET-V---SND-K---VAWYQOKPGQAPRLLIYGASS----RATGIPDRFRSGS--GSGTDFTLTISIS-GLEPEDFVYVYYCQ 90  
BAC01704 48 SQS-I-----S-SYLNWYQOKPGKAPKLLIYAASS----LQSGVPSRFRSGS--GSGTDFTLTIS-SLQPEDFATYYCQ 111  
BAC01735 48 SQS-V---SSS---YLAWYQOKPGQAPRLLIYGASS----RATGIPDRFRSGS--GSGTDFTLTIS-RLEPEDFAVYYCQ 112  
ACF34416 26 SQS-I-----G-TWLAWYQOKPGKAPKLLIYKASN----LESGVPSIFRSGS--GSGTEFTLTIS-SLQPDFFATYYCQ 89  
2JIX\_A 26 SQG-I-----R-NDLGWYQOKPGKAPKLLIYAASS----LQSGVPSRFRSGS--GSGTEFTLTIS-SLQPEDFATYYCL 89  
1N8Z\_A 26 SQD-V-----N-TAVAWYQOKPGKAPKLLIYASAF----LYSGVPSRFRSGS--RSGTDFTLTIS-SLQPEDFATYYCQ 89  
1B6D\_A 26 SQD-I-----S-SYLNWYQOKPGKAPKLLIHAASS----LETGVPSRFRSGS--GSGTDFSTTIS-SLQPEDLATYYCQ 89  
1L7I\_L 26 SQD-V-----S-IGVAWYQOKPGKAPKLLIYASASY----RYTGVPSRFRSGS--GSGTDFTLTIS-SLQPEDFATYYCQ 89  
1TZG\_L 26 SQS-V---GNN-K---LAWYQORPGQAPRLLIYGASS----RPSGVADRFRSGS--GSGTDFTLTIS-RLEPEDFAVYYCQ 90  
1B2W\_L 26 SEN-V-----D-TYVSWYQOKPGKAPKLLIYGASN----RYTGVPSRFRSGS--GSGTDFTLTIS-SLQPDFFATYYCG 89  
1FVD\_A 26 SQD-V-----N-TAVAWYQOKPGKAPKLLIYASAF----LESGVPSRFRSGS--RSGTDFTLTIS-SLQPEDFATYYCQ 89  
ACF34417 26 SQD-I-----N-NFLNWYQOKPGKAPNLLIYDASN----LQTVPSRFRSGS--GSGTDFTLTIT-TLQPEDIATYYCQ 89  
BAC01707 48 SQS-I-----S-SYLNWYQOKPGKAPKLLIYAASS----LQSGVPSRFRSGS--GSGTDFTLTIS-SLQPEDFATYYCQ 111  
ABU90580 26 SQY-I-----D-NYLNWYQOKPGKAPKLLIYGASN----LETGVPSRFRSGS--GSGTDFFTTIR-SLQPEDIATYYCQ 89  
3R1G\_L 26 SQD-V-----S-TAVAWYQOKPGKAPKLLIYASAF----LYSGVPSRFRSGS--GSGTDFTLTIS-SLQPEDFATYYCQ 89  
BAC01755 48 SQS-V---SSS---YLAWYQOKPGQAPRLLIYGASS----RATGIPDRFRSGS--GSGTDFTLTIS-RLEPEDFAVYYCQ 112  
CAA75031 48 SQS-I-----A-DYLNWYQOKPGKAPKLLIYGSSS----LQSGVPSRFRSGS--GSGTDFTLTISIS-SLQPGDFATYYCQ 111  
BAC01701 48 SRG-I-----R-NDLGWYQOKPGKAPERLLIYAASST----LQSGVPSRFRSGS--GSGTEFTLTIS-SLQPEDFATYYCL 111  
1ZA3\_L 26 SQD-V-----N-TAVAWYQOKPGKAPKLLIYAASY----LYSGVPSRFRSGS--GSGTDFTLTIS-SLQPEDFATYYCQ 89  
ABU90646 26 SQS-VLH-SSY-NANYLAWYQOKQGPRLLIYWAST----RESGVDRFRSGS--GSGTDFTLTIS-SLQAEDVAVYYCQ 95  
BAC01760 48 SQS-V---SSS---YLAWYQOKPGQAPRLLICGASS----RATGIPDRFRSGS--GSGTDFTLTIS-RLEPEDFAVYYCQ 112  
BAC01684 48 SQG-I-----A-NNLAWYQOTPGKVPKLLIYATST----LQSGVPSRFRSGS--GSGTDFTLTIS-SLQPEDVATYYCQ 111  
BAC01723 48 SQS-I-----S-SYLNWYQOKPGKAPKLLIYAASS----LQSGVPSRFRSGS--GSGTDFTLTIS-SLQPEDFATYYCQ 111  
2QQN\_L 26 SQY-F-----S-SYLAWYQOKPGKAPKLLIYGASS----RASGVPSRFRSGS--GSGTDFTLTIS-SLQPEDFATYYCQ 89  
2QQK\_L 26 SQD-V-----S-TAVAWYQOKPGKAPKLLIYASAF----LYSGVPSRFRSGS--GSGTDFTLTIS-SLQPEDFATYYCQ 89  
BAC01724 48 SQS-I-----S-SYLNWYQOKPGKAPKLLIYAASS----LQSGVPSRFRSGS--GSGTDFTLTIS-SLQPEDFATYYCQ 111  
BAC01748 48 SQS-V---SSS---YLAWYQOKPGQAPRLLIYGASS----RATGIPDRFRSGS--GSGTDFTLTIS-RLEPEDFAVYYCQ 112  
BAC01738 48 SQS-V---SSS---YLAWYQOKPGQAPRLLIYGASS----RATGIPDRFRSGS--GSGTDFTLTIS-RLEPEDFAVYYCQ 112  
JE0242 26 SQS-V---SNN-Y---LAWYQOKPGQAPSLLIYDASS----RATGIPDRFRSGS--GSGTDFILTIS-GLEPEDFAVYYCQ 90  
1RHH\_A 26 SQS-V---SSG-S---LAWYQOKPGQAPRLLIYGAST----RATGIPDRFRSGS--GSGTDFTLTIG-RLEPEDLAVYYCQ 90  
AAD29608 48 SQD-I-----N-NYLNWYQOKPGKTPKLLIYGASN----LETGVPSRFRSGS--GSGTDFIFTIS-SLQPEDIATYYCQ 111

|          |    |                                                                                   |     |
|----------|----|-----------------------------------------------------------------------------------|-----|
| 3QRG_L   | 26 | SQS-VDY-NGI---SYMHWYQOKPGQPPELLIYAASN----PESGVPDFRFSGS--GSGTDFTLTIS-SLQAEDVAVYYCQ | 93  |
| BAC01676 | 48 | SQS-I-----S-SYLNWYQOKPGKAPKLLIYAASS----LQSGVPSRFSGS--GSGTDFTLTIS-SLQPEDFATYYCQ    | 111 |
| BAC01702 | 48 | SQS-I-----S-TYLNWYQOKPGKAPKLLIYAASS----SQSGVPSRFSGS--GSGTDFTLTIN-SLQPEDFATYYCQ    | 111 |
| 3KR3_L   | 27 | SQS-I-----S-NYLNWYQOKPGKAPKLLIYTAST----LQSGVPSRFSGS--ASGTDFTLTIN-SLQPEDFATYSCQ    | 90  |
| ABU90625 | 26 | NQD-I-----N-NYLNWYQOKPGKAPKLLIYDASN----LEIGVPSRFSGS--GSGTDFTLTIS-SLQPEDIATYYCQ    | 89  |
| ABU90557 | 26 | SQS-I-----N-SFLNWYQHKPGKAPNLLIYAASS----LQSGVPSRFSGS--ASGTDFTLTIS-NLQPEDFATYYCQ    | 89  |
| AAW82027 | 46 | SQD-I-----R-NYVAWYQOKSGKAPKLLIYAAST----LQSGVPSRFSGS--GSGTDFTLTIN-SLQSEDFATYYCQ    | 109 |
| BAK48744 | 26 | SQS-V---GI--K---LAWYQOKPGHAPRLLIYGATA----RATGIPGRFSGS--GSGTDFTLTIN-SLQPEDFATYYCQ  | 89  |
| BAC01758 | 48 | SQS-V---SSS---YLAWYQOKPGQAPRLLIYGASS----RATGIPDRFSGS--GSGTDFTLTIS-RLEPEDFAVYYCQ   | 112 |
| 1RZI_A   | 25 | SQS-I-----S-SYLNWYQOKPGKVPKLLIYAASS----LQSGVPSRFSGS--GSGTDFTLTIS-SLQPEDFATYYCQ    | 88  |
| BAB18259 | 26 | SQG-I-----G-NYLVWFQOKPGKVPKLLIYAASS----LQSGVPSRFSGS--GSGTEFTLTIS-SLQPEDFATYYCL    | 89  |
| 2XA8_L   | 26 | SQS-VDY-D-G-D-SYMNWYQOKPGKAPKLLIYAASY----LESGVPSRFSGS--GSGTDFTLTIS-SLQPEDFATYYCQ  | 93  |
| 1RZ7_L   | 26 | SQD-I-----S-TWLAWYQOKPGKAPKLLIYAAST----LQSGVPSRFSGS--GSGTDFSLTIN-SLQPEDFATYYCQ    | 89  |
| 3JWD_L   | 26 | SQD-I-----S-TWLAWYQOKPGKAPKLLIYAAST----LQSGVPSRFSGS--GSGTDFSLTIN-SLQPEDFATYYCQ    | 89  |
| 3SKJ_L   | 26 | SQS-I-----S-TWLAWYQOKPGKAPKLLIYKASN----LHTGVPSRFSGS--GSGTEFSLTIS-GLQPDDFATYYCQ    | 89  |
| 3SDY_L   | 27 | SQS-V---SMN-Y---LAWFQOKPGQAPRLLIYGASR----RATGIPDRISGS--GSGTDFTLTIS-RLEPADFAVYYCQ  | 91  |
| BAC01681 | 48 | SQD-I-----S-NYLNWYQOKPGKAPKLLIYDASN----LETGVPSRFSGS--GSGTDFTLTIS-SLQPEDIATYYCQ    | 111 |
| AAH62704 | 46 | SQT-V---FSS-H---LAWYQORPGQAPRLLIYGASS----RATGIPDRFSGS--GSGTDFTLTIT-RLEPEDFAVYFCQ  | 110 |
| BAC01711 | 48 | SQY-I-----S-RWLAWYQORPGKAPKLLIYAAAS----LQSGVPSRFSGS--GSGTDFTLTIS-SLQPEDFATYYCQ    | 111 |
| BAC01677 | 48 | SQS-I-----S-SWLAWYQOKPGKAPKLLIYKASS----LESGVPSRFSGS--GSGTEFTLTIS-SLQPDDFATYYCQ    | 111 |
| 3IDX_L   | 26 | SQD-I-----R-NYLNWYQOKPGKAPKLLIYDASN----SETGVPSRFSGS--GSGRDFTLTIS-SLQPEDVATYYCQ    | 89  |
| BAH03698 | 26 | SQS-VFY-NSI-NKNFLAWYQORPGQPPELLIYWAST----RASGVPDFRFSGS--GSGTDFTLTIS-SLQAEDVAVYYCQ | 95  |
| 3DVN_A   | 27 | SQS-V-----S-SAVAWYQOKPGKAPKLLIYSASS----LYSGVPSRFSGS--RSGTDFTLTIS-SLQPEDFATYYCQ    | 90  |
| 0709220A | 26 | SQS-I-----S-RWLAWYQOKPGEAPKLLIYGASN----LESGVPSRFSGS--GSGTEFTLTIS-SLQSDDFATYYCQ    | 89  |
| 1PG7_L   | 26 | SRD-I-----K-SYLNWYQOKPGKAPKLLIYATYS----LAEGVPSRFSGS--GSGTDYTLTIS-SLQPEDFATYYCL    | 89  |
| BAC01767 | 48 | SQS-V---SSS---YLAWYQOKPGQTPRLLIYGASS----RATGIPDRFSGS--GSGTDFTLTIS-RLEPEDFAVYYCQ   | 112 |
| BAC54152 | 26 | SQS-I-----S-SWLAWYQOKPGKAPKLLIYKASS----LESGVPSRFSGS--GSGTEFTLTIS-SLQPDDFATYYCQ    | 89  |
| 1JPS_L   | 26 | SRD-I-----K-SYLNWYQOKPGKAPKLLIYATYS----LAEGVPSRFSGS--GSGTDYTLTIS-SLQPEDFATYYCL    | 89  |
| BAA82105 | 26 | SQG-I-----S-SYLAWYQOKPGKAPKLLIYAAST----LQSGVPSRFSGS--GSGTEFTLTIS-SLQPEDFATYYCQ    | 89  |
| AAC17968 | 24 | SQY-I-----S-SYLAWYQOKPGKAPKLLIYAAST----LQSGVPSRFSGS--GSGTDFSLTIS-CLQSEDFATYYCQ    | 87  |
| 3G6J_E   | 26 | SQD-V-----S-TAVAWYQOKPGKAPKLLIYSASF----LYSGVPSRFSGS--GSGTDFTLTIS-SLQPEDFATYYCQ    | 89  |
| AAH73775 | 48 | SQN-I-----N-NYLNWYQLKPGKAPNLLIYAASS----LQSGVPSRFSGS--GSGTDFTLTIS-SLRPDDFATYYCQ    | 111 |
| 3BDY_L   | 26 | SQD-IPR-S-I-S-GYVAWYQOKPGKAPKLLIYWGSY----LYSGVPSRFSGS--GSGTDFTLTIS-SLQPEDFATYYCQ  | 93  |
| 1UJ3_A   | 26 | SQD-I-----K-SFLSWYQOKPEKAPKSLIYATYS----LADGVPSRFSGS--GSGTDYTLTIS-SLQPEDFATYYCL    | 89  |
| 3ZTJ_H   | 26 | SQS-VTF---N-YKNYLAWYQOKPGQPPELLIYWAST----RESGVPDFRFSGS--GSGTDFTLTIS-SLQAEDVAVYYCQ | 93  |
| BAC01705 | 48 | SQS-I-----S-SWLAWYQOKPGKAPKLLIYKASS----LESGVPSRFSGS--GSGTEFTLTIS-SLQPDDFATYYCQ    | 111 |
| ABU90670 | 26 | SQD-I-----R-RNLNWYQOKPGKAPNLLIYNAST----LQTVPSRFSGS--VSGTDFTLTIS-SLQPEDIATYHCQ     | 89  |
| 3AAZ_B   | 26 | SQS-IVH-SNG-H-TYLEWYLQKPGQSPRLLIYQVST----RFSGVPDFRFSGS--GSGTDFTLKIS-RVEAEDVGYYCF  | 94  |
| AAS54981 | 24 | SQS-V---SSG-S---LAWYQOKPGQAPRLLIYGAST----RATGIPDRFSGS--GSGTDFTLTIG-RLEPEDLAVYYCQ  | 88  |
| ABU90544 | 26 | SQG-I-----S-NSLNWYQOKPGKAPKLLIYDASN----LETGVPSRFTGS--GSGTDFTFISIS-SLQPEDIATYYCQ   | 89  |
| 3FZU_L   | 26 | SQD-I-----R-YLNWYQOKPGKAPKLLIYVASS----LQSGVPSRFSGS--GSGTEFTLTVS-SLQPEDFATYYCL     | 89  |
| 3DVG_A   | 27 | SQS-V-----S-SAVAWYQOKPGKAPKLLIYSARS----LYSGVPSRFSGS--RSGTDFTLTIS-SLQPEDFATYYCQ    | 90  |
| 3NFP_B   | 26 | SSS-I-----SYMHWYQOKPGKAPKLLIYTTSN----LASGVPARFSGS--GSGTEFTLTIS-SLQPDDFATYYCH      | 88  |
| BAC01722 | 48 | SQS-V---SSS---YLAWYQOKPGQAPRLLIYGASS----RATGIPDRFSGS--GSGTDFTLTIS-RLEPEDFAVYYCQ   | 112 |
| ABU90602 | 26 | SQN-I-----D-NYLNWYQOKPGKAPKLLIYEASS----LRSGVPSRFSGS--GSGTEFTLTIS-SLQPEDFATYYCQ    | 89  |
| ABU90649 | 26 | SQG-I-----S-SWLAWYQOKPEKAPKSLIYAASS----LQSGVPSRFSGS--GSGTDFTLTIT-GLQPEDFATYYCQ    | 89  |
| BAA82103 | 26 | SQS-I-----G-PFLNWYQOKPGKAPKLLIYAASS----LQDGVPSRFSGS--GSATDFTLTIS-SLQPEDFATYYCQ    | 89  |

|          |    |                                                                                   |     |
|----------|----|-----------------------------------------------------------------------------------|-----|
| 2VXQ_L   | 26 | SQR-I-----N-TYLNWYQHKPGKAPKLLIYAASS----LQSGVPSRFSGS--GYGTDFTLTIS-SLQPEDFASYCQ     | 89  |
| BAC01750 | 48 | SQS-V---SSS---YLAWYQKPGQAPRLLIYGASS----RATGIPDRFSGS--GSGTDFTLTIS-RLEPEDFVYVYQ     | 112 |
| BAC01741 | 48 | SRD-I-----S-NYLNWYQKPGKAPKLLIYDASN----LETGVPSRFSGS--GSGTDFFTTIS-SLQPEDIATYYCQ     | 111 |
| BAB18253 | 26 | SQS-I-----S-SWLAWYQKPGKAPKLLIYKASG----LESGVPSRFSGS--GSGTEFTLTIS-SLQPDDFATYYCQ     | 89  |
| AAH32451 | 46 | SQS-L---SSS-Y---LAWYQKPGQAPRLLIYGVSS----RATGIPDRFSGS--GSGTDFTLTIS-RLEPEDFAVYVYQ   | 110 |
| BAC01762 | 48 | SQG-I-----S-NSLAWYQKPGKAPKLLIYAASR----LESGVPSRFSGS--GSGTDYTLTIS-SLQPEDFATYYCQ     | 111 |
| 1HKL_L   | 26 | SQE-I-N-G-----YLGWLQKPDGTIKRLIYAASST----LHSGVPKRFSGS--RSGSDYSLTIS-SLESEDFADYYCL   | 89  |
| CAA09181 | 48 | SQG-I-----S-NYLAWYQKPGKAPDLLIYAASST----LQSGVPSRFSGS--GSGTDFILTIS-RLQSEDFAIYYCQ    | 111 |
| ACF34420 | 26 | SQG-I-----S-NYLAWFQKPGKAPDLLIYAASST----LQSGVPSRFSGS--GSGTDFTLTIS-SLQVEDVATYYCQ    | 89  |
| 1BEY_L   | 26 | SQN-I-----D-KYLNWYQKPGKAPKLLIYNTNN----LQTVPSRFSGS--GSGTDFFTTIS-SLQPEDIATYYCL      | 89  |
| AAH16380 | 46 | SQI-V---SSA-Y---LAWYQKPGQAPRLLIMFGSSS----RATGIPDRFSGS--GSGTDFTLTIS-RLEPEDFAVYVYQ  | 110 |
| BAC01697 | 48 | SQS-V---SSS---YLAWYQKPGQAPRLLIYGASS----RATGIPDRFSGS--GSGTDFTLTIS-RLEPEDFAVYVYQ    | 112 |
| BAB18255 | 26 | SQS-L-----N-NWLAWYQKPGKAPKLLIYKASS----LESGVPSRFSGS--ASGTEFTLTIS-SLQPDDFATYYCQ     | 89  |
| 2XRA_L   | 26 | SQD-I-----R-NHLNWXQKPGKAPKLLIYDASN----LATGVPSRFSGS--GSGTDFFTTIS-SLQPEDLATYYCQ     | 89  |
| ACF34428 | 26 | SQS-I-----S-SWLAWYQKPGKAPKLLIYKAST----LESGVPSRFSGS--GSGTEFTLTIT-NLRPDDFATYYCQ     | 89  |
| 3JWO_L   | 26 | SQD-I-----S-TWLAWYQKPGKAPKLLIYAASST----LQSGVPSRFSGS--GSGTDFSLTIN-SLQPEDFATYYCQ    | 89  |
| BAJ52220 | 26 | SQA-I-----E-DDLDWYQKPGKAPKRLVYGASN----LQRGVPSRFSGS--GSGTEFTLTIS-SLQPEDFATYYCL     | 89  |
| BAC01678 | 48 | SQG-I-----S-NYLAWFQKPGKVPKRLIYAASST----LQSGVPSRFSGS--GSGTEFTLTIS-SLQPEDFATYYCL    | 111 |
| BAC01675 | 48 | SQS-I-----S-TWLAWYQKPGKAPNLLIYQAST----LTSVPSRFSGS--GSGTEFTLTII-SLQPDDFATYYCQ      | 111 |
| AAA70230 | 26 | SQS-L-----S-GWVAWYQKPGKAPKLLIYKAST----LESGVPSRFSGS--GSGTVFALTIS-SLQPDDSATYYCQ     | 89  |
| 3QCT_L   | 26 | GQS-LVH-ING-N-TYLHWYLQKPGQSPKLLIYKVSNN----LFSVGPDRFSGS--GSGTDFTLKIS-RVEAEDVGYYFC  | 94  |
| 3QOT_L   | 27 | SQS-VLY-SSN-NKNYLAWYQKPGQPPKLLIYWAST----RESVGPDRFSGS--GSGTDFTLTIS-SLQAEDVAVYVYQ   | 96  |
| BAC01734 | 48 | SQS-LVH-SDG-N-TYLNWFQQRPGQSPRLLIYKVSNN----RDSVGPDRFSGS--GSGTDFTLKIS-RVEAEDVGYYVCM | 116 |
| BAC01699 | 48 | SQS-V---SSS---YLAWYQKPGQAPRLLIYGASS----RATGIPDRFSGS--GSGTDFTLTIS-RLEPEDFAVYVYQ    | 112 |
| AAH22362 | 46 | TQS-LVY-SDG-N-TYLNWFQQRPGQSPRLLIYKVSNN----RDSVGPDRFSGS--GSGTDFTLKIT-RVEAEDVGYYFCM | 114 |
| BAG62953 | 46 | SQD-I---DD-D---MNWYQKPGQAPRLLIYQEATT----LVPGIPDRFSGS--GYGTDFTLTIN-NIESEDAAYYFCL   | 109 |
| BAC01730 | 48 | SQS-LVY-SDG-N-TYLNWFQQRPGQSPRLLIYKVSNN----RDSVGPDRFSGS--GSGTDFTLKIS-RVEAEDVGYYVCM | 116 |
| 3M80_L   | 26 | SQS-LLR-RDG-H-NDLEWYLQKPGQSPQLIYLGST----RASVGPDRFSGS--GSGTDFTLKII-RVEAEDAGTYVCM   | 94  |
| 2CMR_L   | 26 | SEG-I-----Y-HWLAWYQKPGKAPKLLIYKASS----LASGAPSRFSGS--GSGTDFTLTIS-SLQPDDFATYYCQ     | 89  |
| 3QOS_L   | 26 | SQS-VLY-SSN-NKNYLAWYQKPGQPPKLLIYWAST----RESVGPDRFSGS--GSGTDFTLTIS-SLQAEDVAVYVYQ   | 95  |
| 1AD0_A   | 26 | SSS-V-----TYIHWYQKPLAPKSLIYATSN----LASVPSRFSGS--GSGTDYFTTIS-SLQPEDIATYYCQ         | 88  |
| BAC01754 | 48 | SQS-V---SSS---YLAWYQKPGQAPRLLIYGASS----RATGIPDRFSGS--GSGTDFTLTIS-RLEPEDFAVYVYQ    | 112 |
| BAJ52219 | 26 | SQG-I-----R-NELAWYQKPGKAPKRLIQAASS----LHTGVPSRFSGS--GSGTEFTLTIS-SLQPEDFATYHCL     | 89  |
| 3UTZ_D   | 26 | SQS-IVH-SNG-N-TFLEWYLQKPGQSPKLLIYKVSNN----RFSVGPDRFSGS--GSGTDFTLKIS-RVEAEDLVYYVCF | 94  |
| 3TCL_L   | 26 | SQS-----VH-S-RYFAWYQKPGQPPRLLIYGGST----RATGIPNRFSG--GSGTQFTLTVN-RLEAEDFAVYVYQ     | 90  |
| BAF48992 | 26 | SQG-I-----S-RWLAWYQKPGKAPKLLIYAASST----LHTGVPSRFSGS--GSGTDFALTIS-SLQPEDFATYYCQ    | 89  |
| AAH05332 | 48 | SQD-I-----S-NYLAWFQKPGKAPKSLIYGASS----LQSGVQSKFSGS--GSGTDFTLTIS-SLQPEDFATYYCQ     | 111 |
| 1DFB_L   | 26 | SQS-I-----S-RWLAWYQKPGKVPKLLIYKASS----LESGVPSRFSGS--GSGTEFTLTIS-SLQPDDFATYYCQ     | 89  |
| ABU90712 | 26 | SQS-I-----S-YSLNWXQKPGNAPKFLIYASST----LQTVPARFSGS--GSETDFNLTII-SLQPEDFATYYCL      | 89  |
| BAC01698 | 48 | SQS-V---SSS---YLAWYQKPGQAPRLLIYGASS----RATGIPDRFSGS--GSGTDFTLTIS-RLEPEDFAVYVYQ    | 112 |
| BAC01680 | 48 | SQD-I-----S-NYLNWYQKPGKAPKLLIYDASN----LETGVPSRFSGS--GSGTDFFTTIS-SLQPEDIATYYCQ     | 111 |
| 3FO0_L   | 26 | SQS-IVH-SNG-N-TYLEWYLQKPGQSPKLLIYKVSNN----RFSVGPDRFSGS--GSGTDFTLKIN-RVEAEDLVYYVCF | 94  |
| 3U46_L   | 26 | SQN-----VH-P-RYFAWYQKRGQSPRLLIHSGST----RAAGIADRFSGG--GSGMHFTLTIT-RVEPEDFAVYVYQ    | 90  |
| 3FO2_L   | 26 | SQS-IVH-SNG-N-TYLQWYLQKPGQSPKLLIYKVSNN----RFSVGPDRFSGS--GSGTDFTLKIN-RVEAEDLVYYVCF | 94  |
| 3S34_L   | 26 | SQG-I-----D-NWLWYQKPGKAPKLLIYDASN----LDTGVPSRFSGS--GSGTYFTLTIS-SLQAEDFAVYVYQ      | 89  |
| BAC01753 | 48 | SQS-V---SSS---YLAWYQKPGQAPRLLIYGASS----RATGIPDRFSGS--GSGTDFTLTIS-RLEPEDFAVYVYQ    | 112 |
| 1GAF_L   | 26 | SQE-I-N-G-----YLGWLQKPDGTIKRLIYAASST----LHSGVPKRFSGS--RSGSDYSLTIS-SLESEDFADYYCL   | 89  |

|          |    |                                           |                                         |     |
|----------|----|-------------------------------------------|-----------------------------------------|-----|
| BAC01682 | 48 | SQS-LLH-TNG-V-NFLDWYLQKPGQSPKLLIYLASH---- | RASGVDRFSGS--GSGTDFTLRIS-RVEAEDVGIYYCM  | 116 |
| 1IQD_A   | 25 | SQS-F---SSS-Y---LAWYQKPGQAPRLLIYGAST----  | RATGIPDRFSGS--GSGTDFTLTIS-RLEPEDFAVYYCQ | 89  |
| 3FO1_L   | 26 | SQS-IVH-SNG-N-TYLAWYLQKPGQSPKLLIYKVSN---- | RFSGVDRFSGS--GSGTDFTLKIN-RVEAEDLGVYYCF  | 94  |
| BAC01740 | 48 | SQS-LLH-SDG-K-TYLYWYLQKPGQPPQLLIYEVSN---- | RFSGVDRFSGS--GSGTDFTLKIS-RVEAEDVGVYYCM  | 116 |
| BAC01708 | 48 | SQS-VLY-SSN-NKNYLAWYQKPGQPPKLLIYWAST----  | RESGVDRFSGS--GSGTDFTLTIS-SLQAEDVAVYYCQ  | 117 |
| BAC01715 | 48 | SQD-I----DD-D---MNWYQKPGQAAFI IQEATT----  | LVPGISPRFSGS--GYGDFTLTIN-NIESEDAAYYFCL  | 111 |
| 3U1S_L   | 46 | SHS-LQH-STG-A-NYLAWYLQRPQTPRLLIHLATH----  | RASGVDRFSGS--GSGTDFTLKIS-RVESDDVGTYYCM  | 114 |
| BAC01674 | 48 | SQS-I-----S-SWLAWYQRKPGKAPKLLIYKASS----   | LESGVPSRFSGS--GSGTEFTLTIS-SLQPDDFATYYCQ | 111 |
| BAC01688 | 48 | SQS-VLY-SSN-NKNYLAWYQKPGQPPKLLIYWAST----  | RESGVDRFSGS--GSGTDFTLTIS-SLQAEDVAVYYCQ  | 117 |
| BAB18263 | 26 | SQS-V---SSS-Q---FAWYQKPGQAPRLLICGASS----  | RATGIPDRFSGS--GSGTDFTLTIS-RLEPEDFAVYHCQ | 90  |
| BAC01719 | 48 | SQS-LVY-SSG-S-THLSWFHQRPGRPRLLINFSVN----  | RDSGVDRFSGS--GSGTDFTLQIS-RVEAEDVGAYYCM  | 116 |
| BAC01716 | 48 | SQD-I----DD-D---MNWYQKPGQAAFI IQEATT----  | LVPGISPRFSGS--GYGDFTLTIN-NIESEDAAYYFCL  | 111 |
| BAC01692 | 48 | SES-V---SSS----YLAWYQKLGQAPRLLIYGAFN----  | RAAGIPDRFTGS--GSGTDFSLSIS-RLEPEDVAVYYCQ | 112 |
| ABU90647 | 26 | SQD-I-----S-NYLNWYQKLGKAPSLLIYDAAD----    | LETGVSLRFNGS--GSGTDFFTTIS-SLQPEDIAIYYCQ | 89  |
| AAA87674 | 26 | SQS-I-----S-PWLPWYQKPGKAPKLLIYKASS----    | LESGVPSRFSGS--GSGTEFTLTIT-SLQPDDFATYFCQ | 89  |
| BAC01746 | 48 | SQS-V---SSS----YLAWYQKPGQAPRLLIYGASS----  | RATGIPDRFSGS--GSGTDFTLTIS-RLEPEDFAVYYCQ | 112 |
| A23746   | 26 | SQS-V---SSN-Y---LAWYQKPGQAPRLLIYDASS----  | RATGIPDRFSGS--GSGTDFTLTIS-RLEPEDFAVYYGQ | 90  |
| BAC01733 | 48 | SQS-LLH-SNG-Y-NYLDWYLQKPGQSPQLLIYLGSN---- | RASGVDRFSGS--GSGTDFTLKIS-RVEAEDVGVYYCM  | 116 |
| BAC85236 | 46 | SQS-V---SST-S---LAWYQKPGQAPRLLIYAASS----  | RATGVDRFSGS--GSATDFTLTIS-RLEPEDFAVYHCQ  | 110 |
| AAC02819 | 26 | SQS-V---SNG-Q---LTWYQKPGQAPRLLIYGASS----  | RATGIPDRFSGS--GSGTDFTLTIS-RLEPEDFAVYYCH | 90  |
| 1S3K_L   | 26 | SQR-IVH-SNG-N-TYLEWYQTPGKAPKLLIYKVSN----  | RFSGVPSRFSGS--GSGTDFFTTIS-SLQPEDIATYYCF | 94  |
| 1CLY_L   | 26 | SQI-IVH-NNG-N-TYLEWYLQKPGQSPQLLIYKVSN---- | RFSGVDRFSGS--GSGTDFTLKIS-RVEAEDLGVYYCF  | 94  |
| BAC01695 | 48 | SQS-V---SSS----YLAWYQKPGQAPRLLIYGASS----  | RATGIPDRFSGS--GSGTDFTLTIS-RLEPEDFAVYYCQ | 112 |
| ACF34415 | 26 | SQD-I-----S-NYLNWFQKPGKAPNLLIYDASN----    | LETGVPSRFSGS--GSGTNFTTITH-SLQPEDIATYYCQ | 89  |
| BAC01739 | 48 | SQS-VLY-SSN-NKNYLAWYQKPGQPPKLLIYWAST----  | RESGVDRFSGS--GSGTDFTLTIS-SLQAEDVAVYYCQ  | 117 |
| 4D9Q_D   | 26 | STD-I-----D-DDMNWYQKPGKVPKLLISGGNT----    | LRPGVPSRFSGS--GSGTDFTLTIS-SLQPEDVATYYCL | 89  |
| BAC01765 | 48 | SQS-LVY-SDG-N-TYLNWFQRPQSPRLLIYKVSN----   | WDSGVDRFSGS--GSGTDFALKIS-RVEAEDVGVYYCM  | 116 |
| ABU90713 | 26 | SQT-VLY-SSN-NKNYLAWYQKPGQPPKLLIYWAST----  | RESGVDRFSGS--GSGTDFTLTIS-SLQAEDVAVYSCQ  | 95  |
| BAA82100 | 26 | SES-I-----D-GWLAWYQKPGKPPKLLIYKASN----    | LHSGVPSRFSGS--GSGTEFTLTIS-SLQPDDFATYHCQ | 89  |
| BAC01691 | 48 | SQS-I---SSS----YLAWYQKAGQAPRLLMYGASR----  | RATGIPDRFSGS--GSGTEFTLTIT-RLEPEDFAVYYCQ | 112 |
| BAC01729 | 48 | SQS-LVH-SDG-N-TYLNWFQRPQSPRLLIYKVSN----   | RDSGVDRFSGS--GSGTDFTLKIS-RVEAEDVGVYYCM  | 116 |
| 1AD9_L   | 26 | SKS-LLH-SNG-D-TFLYWFQKPGKAPKLLMYRMSN----  | LASGVPSRFSGS--GSGTEFTLTIS-SLQPDDFATYYCM | 94  |
| 4D9R_L   | 26 | STD-I-----D-DDMNWYQKPGKVPKLLISGGNT----    | LRPGVPSRFSGS--GSGTDFTLTIS-SLQPEDVATYYCL | 89  |
| ABU90644 | 26 | SQY-I-----S-SYLNWYQKPGQAPKLLVYGASR----    | FQSGVPSNFSGS--GAGTGFTLTIS-SLQPEHFATYYCQ | 89  |
| BAC01690 | 48 | SQS-I---SSS----HLAWYQKPGQAPRLVIYGASN----  | RATGIPDRFSGS--GSGTDFTLTIS-RLEPEDFAVYHCQ | 112 |
| BAC01763 | 48 | SQS-LLH-SNG-Y-NYLDWYLQKPGQSPQLLIYLGSN---- | RASGVDRFSGS--GSGTDFTLKIS-RVEAEDVGVYYCM  | 116 |
| 1TJG_L   | 26 | SQG-V-----T-SALAWYRQKPGSPQLLIYDASS----    | LESGVPSRFSGS--GSGTEFTLTIS-TLRPEDFATYYCQ | 89  |
| BAC01700 | 48 | SQS-VLY-SSN-NNNYLAWYQKPGQPPKLLIYWAST----  | RESGVDRFSGS--GSGTDFTLTIS-SLQAEDVAVYYCQ  | 117 |
| 3LEV_L   | 26 | SQG-V-----T-SALAWYRQKPGSPQLLIYDASS----    | LESGVPSRFSGS--GSGTEFTLTIS-TLRPEDFATYYCQ | 89  |
| ACF34429 | 26 | SNQ-VLY-KSN-NKNYLAWYQKPGQPPRLLMYWAST----  | RESGVSDRFSGS--GSGTDFTLTIS-SLQAEDVAVYYCH | 95  |
| 1AXS_L   | 26 | SQD-I-N-S-----YLNWFQKPGKSPKTLIYRTNR----   | LVDGVPSRFSGS--GSGQDYSLTIS-SLEYEDMGIYYCL | 89  |
| 3OAY_K   | 26 | SQS-I-----E-TWLAWYQKPGKAPKLLIYKAST----    | LKTGVPSRFSGS--GSGTEFTLTIS-GLQFDDFATYHCQ | 89  |
| 1ZLS_L   | 25 | SQS-I-----E-TWLAWYQKPGKAPKLLIYKAST----    | LKTGVPSRFSGS--GSGTEFTLTIS-GLQFDDFATYHCQ | 88  |
| BAC01720 | 48 | SQS-LVY-SSG-S-THLSWFHQRPGRPRLLINFSVN----  | RDSGVDRFSGS--GSGTDFTLQIS-RVEAEDVGVYYCM  | 116 |
| ABU90604 | 26 | SQD-I-----N-NYLNWYQHKPGKAPNLLIYDTAN----   | LITGVPSRFSGS--GSGTNFTTIS-GLQPDDFATYYCQ  | 89  |
| BAC01694 | 48 | SHY-V---SSS----YLAWYQKPGQAPRLLIYDAST----  | RAAGIPDRFSGG--GSGTDFTLTIS-RLESEDFAIYYCQ | 112 |
| BAC01685 | 48 | SQS-PVH-SVG-T-TALSWFQRPQSPRLLYNVSN----    | RDSGVDRFSGS--GSGTDFTLQIS-RVEAEDVGVYYCM  | 116 |



|          |    |                                                                                    |     |
|----------|----|------------------------------------------------------------------------------------|-----|
| 2AJ3_A   | 25 | SQD-I-----Q-KFLAWYQLTPGDAPKLLMYSAST----LQSGVPSRFSGS--GSGTEFTLTIS--GLQPEDFATYYCQ    | 88  |
| BAC01718 | 48 | SQS-LVD-SNG-R-IYLAWFQQRPGQSPRRLIYPVSK----RDSGVPDRFSGS--GSGTEFTLKIS-RVEAEDVGYYCM    | 116 |
| 1BBJ_L   | 26 | SEN-I-Y-S-----NLAWYQKQKSPQLLVYAATN----LADGVPSRFSGS--GSGTQYSLKIN-SLQSEDFGSYYCQ      | 89  |
| 1OM3_L   | 25 | SQS-I-----E-TWLAWYQKPKGKAPKLLIYKAST----LKTGVPSRFSGS--GSGTEFTLTIS--GLQFDDFATYHCQ    | 88  |
| 3INU_L   | 26 | SQS-VLY-SSN-NKSYLAWYQKPGQPPKLLIYWAST----RESGVPDRFSGS--GSGTDFTLTIS--SLQAEDVAVYYCQ   | 95  |
| BAC01764 | 48 | SQS-LLH-SNG-Y-NYLDWYLQKPGQSPQLLIYLGSN----RASGVPDRFSGS--GSGTDFTLKIS-RVEAEDVGYYCM    | 116 |
| ACF34430 | 26 | SQS-VLF-SFN-NKNYLSWYQKSGQPPKLLIYWAST----RESGVPDRFNGS--GSGTDFTLTIN--SLQAEDVAVYHCH   | 95  |
| ABU90648 | 26 | SQN-VFY-SSN-NKNYVAWYQKPGQPPRLLIYRAST----RESGVPDRFSGG--GSGTDFTLTIS--SLQAEDVAVYFCQ   | 95  |
| ABU90637 | 26 | SQN-LLY-SSN-NRNYLAWYQQRPGQPPKLLIDWAST----RESGVPDRFSGS--GSGTHFTLTIS--SLQAGDVAVYYCQ  | 95  |
| BAC01687 | 48 | SQS-LVY-SDG-N-TYLNWFQQRPGQSPRRLIYKVSN----RDSGVPDRFSGS--GSGTDFTLKIS-RVEAEDVGYYCM    | 116 |
| BAC01686 | 48 | SQS-LLH-SNG-N-NYLDWYLQKPGHSPQLLIYLGSN----RASGVPDRFSGS--GSGTEYTLKIS-RVEAEDVGYYCM    | 116 |
| BAF49281 | 26 | SQS-LVL-SDG-N-TYLSWFQQRPGQSPRRLIYKVSN----RNSGVPDRFIGS--GSGTDFTLKIS-RVEAEDVGYYCM    | 94  |
| 2F5A_L   | 26 | SQG-V-----T-SALAWYRQKPGSPPQLLIYDASS----LESGVPSRFSGS--GSGTEFTLTIS--TLRPEDFATYYCQ    | 89  |
| 3D0L_A   | 26 | SQG-V-----T-SALAWYRQKPGSPPQLLIYDASS----LESGVPSRFSGS--GSGTEFTLTIS--TLRPEDFATYYCQ    | 89  |
| BAC01693 | 48 | SQS-V---DST---YLGWYQKPGQAPRLLIYGASN----RATGIPDRFSGG--GSGADFTLTIS--RLEPEDFAVYFCQ    | 112 |
| 2F5B_L   | 26 | SQG-V-----T-SALAWYRQKPGSPPQLLIYDASS----LESGVPSRFSGS--GSGTEFTLTIS--TLRPEDFATYYCQ    | 89  |
| ACF34421 | 26 | SHD-I-----N-TYLGWLQQTTPGKAPKSLIYAAST----LQSGVPSRFSGG--GSGTHFTLNIS--SLQPEDFATFYCQ   | 89  |
| BAC01742 | 48 | SQS-VLY-SSN-NKNYLAWYQKPGQPPKLLIYWAST----RESGVPDRFSGS--GSGTDFTLTIS--SLQAEDVAVYYCQ   | 117 |
| 3U0T_C   | 26 | SQS-LLY-SDA-K-TYLNWFQQRPGQSPRRLIYQISR----LDPGVPDRFSGS--GSGTDFTLKIS-RVEAEDVGYYCL    | 94  |
| 3GKW_L   | 26 | SQN-IVH-SNG-N-TYLDWYQQTTPGKAPKLLIYKVSN----RFSGVPDRFSGS--GSGTDFFTTIS--SLQPEDIATYYCF | 94  |
| 3CSY_B   | 26 | SQS-VLY-SSN-NKSYLAWYQKPGQPPKLLIYWAST----RESGVPDRFSGS--GSGTDFTLTIS--SLQAEDVAVYYCQ   | 95  |
| BAH03699 | 26 | SQS-LLH-SNG-F-NFLDWYLRKPGQSPQLLIYLGSN----RASGVPDRFSGS--GSGTDFTLKIS-RVEAEDIGVYYCM   | 94  |
| 3QEH_B   | 26 | SQS-LLH-TNG-F-QYLDWYLQKPGQSPQLLIYLGSN----RATGVPHRFSGS--GSGTEFTLKIS-RVEAEDVGYYCM    | 94  |
| 751419A  | 26 | SQD-II-----KYLNWYQQTTPGKAPKLLIYEASN----LQAGVPSRFSGS--GSGTDYFTTIS--SLQPEDIATYYCQ    | 89  |
| AAA87675 | 26 | GHN-I-----T-NFLSWYQKPKGAPTLLIYAVSN----LQDGVPSRFSGS--GSGAEFTLTIS--SLQPEDFATYYCQ     | 89  |
| BAC01683 | 48 | SQS-LLH-SNG-Y-NYSDWYLQKPGQSPQLLIYLGSS----RASGVPDRFSGS--GSGTDFTLKIS-RVEAEDVGYYCM    | 116 |
| 302V_L   | 26 | SQS-LVH-SNG-N-TYLNHWYLQKPGQSPKFLIYKVSN----RFSGVPDRFSGS--GSGTDFILKIS-RVEAEDLGVYFCS  | 94  |
| BAC01703 | 48 | SQS-VLY-SSN-NKNCLAWYQKPGQPPKLLIYWAST----RESGVPDRIRGS--GSGTDFTLTIS--SLQAEDVAVYYCQ   | 117 |
| BAC01714 | 48 | SQS-VLY-SSN-NKNYLAWYQKPGQPPKLLIYWAST----RESGVPDRFSGS--GSGTDFTLTIS--SLQAEDVAVYYCQ   | 117 |
| BAC01731 | 48 | SQS-VLY-SSN-NKNYLAWYQKPGQPPKLLIYWAST----RESGVPDRFSGS--GSGTDFTLTIS--SLQAEDVAVYYCQ   | 117 |
| 751423A  | 26 | SQS-VLY-SSN-SKNYLAWYQKPGQPPKLLIYWAST----RESGVPDRFSGS--GSGTDFTLTIS--SLQAEDVAVYYCQ   | 95  |
| BAC01751 | 48 | SQS-VLY-SSN-NKNYLAWYQKPGQPPKLLIYWAST----RESGVPDRFSGS--GSGTDFTLTIS--SLQAEDVAVYYCQ   | 117 |
| 1U8K_A   | 26 | SQG-V-----T-SALAWYRQKPGSPPQLLIYDASS----LESGVPSRFSGS--GSGTEFTLTIS--TLRPEDFATYYCQ    | 89  |
| BAC04905 | 46 | SQS-LLH-SNG-Y-NYDWWYLQKPGQSPQLLIPLSSN----RASGVPDRFSGS--GSGTDFILKIS-RVEAEDVGYYFCM   | 114 |
| BAC76878 | 26 | SQS-VLY-SSN-KKNYLAWYQKPGQPPKLLIYRAST----RESGVPDRFSGS--GSETDFTLTIS--SLQPEDVAVYYCQ   | 95  |
| BAC01761 | 48 | SQS-LVY-SDG-N-TYLNWFQQRPGQSPRRLIYKVSN----WDSGVPDRFSGS--GSGTDFTLKIS-RVEAEDVGYYCM    | 116 |
| BAC01717 | 48 | SQS-LLH-SNG-F-TYLEWYLQKPGQSPQLLIYLGSN----RASGVPDRFSGS--GSGTDFTLKIS-SVEAEDVGYYCM    | 116 |
| BAC01745 | 48 | SQD-I----DD-D---MNWYQKPGEEAAFI IQEATT----LVPGISPRFSGS--GYGTDFTLTIN--NIESEDAAYYFCL  | 111 |
| AAA70229 | 26 | SQD-I-----N-YFLNWYQKPGRAPKLLIYDASN----LEKGVPSRFSGS--GSGTHFTTIS--SLQPEDFATYYCQ      | 89  |
| BAC05011 | 48 | SHD-I-----E-SFLNWYQKPKGAPKRLIHDGSR----SEKGVPRRFSGS--GFGTDFSLFIN--NLQPEDVATYYCQ     | 111 |
| BAC01732 | 48 | SQS-LLH-SNG-Y-NYLDWYLQKPGQSPQLLIYLGSN----RASGVPDRFSGS--GSGTDFTLKIS-RVEAEDVGYYCM    | 116 |
| BAC01721 | 48 | SQS-LLH-MNG-A-NYLDWYLQKPGQSPQLLIYLGSN----RASGVPDRFSGS--GSETDFTLKIT--RVEADDDVGYYCM  | 116 |
| BAA82102 | 26 | SQS-ILY-SSN-SKNYLAWYQKPGQPPKLLIYWAST----RQSGVPDRFSGS--GSGTNFTLTIS--NLQTEDVAVYYCQ   | 95  |
| BAC85234 | 46 | NQT-IFYKSN-K-TYLAWYQKPSQPPKLLIYWAST----RESGVPDRFSGS--ASGTDFTLTIA--TLQAEDAAYYFCQ    | 115 |
| BAC01710 | 48 | SQD-I----DD-D---VNXYQKPGEEAAVFLILEATT----LVPGIPPRFSGS--GYGTDFTLTIN--NIESEDAAYYFCL  | 111 |
| BAC01712 | 48 | SQD-I----DD-D---VNWYQRKPGEEAAFI IQEATT----LVPGIPPRFSGS--GYGTDFTLTIN--NIESEDAAYYFCL | 111 |
| BAE94187 | 26 | SQS-LVD-TNG-N-TYLIWFHQQRPGQSPRRLIYQVSK----RDSGVPDRFSGS--GSGTDFTLKIS-RVEAEDVGYYFCM  | 94  |

|          |    |                                                                                    |     |
|----------|----|------------------------------------------------------------------------------------|-----|
| AAD15786 | 26 | SQS-I---SSN-Y--YLAWFQKPGQAPRLLMLSTSY----MTSTFPDRFSGS--GSGTDFTLTIS--RRQSEDVAVYYVQ   | 91  |
| 2QR0_A   | 26 | SQS-V-----S-SAVAWYQKPGKAPKLLIYSASS----LYSGVPSRFSGS--RSGTDFTLTIS-SLQPEDFATYYCQ      | 89  |
| 2QSC_L   | 26 | SQD-I-----S-NYLNWYQHKPGKAPKLLIYTASN----LETGVPSRFSGG--GSGTHFSFTIT-SLQPEDAATYFCQ     | 89  |
| AAM46658 | 18 | SQG-I-----S-SWLAWYQKPGKAPKLLIYVASR----LQSGVPSRFSGS--GSGTDFTLTIS-SLQPEDFATYYCQ      | 81  |
| 3SE8_L   | 26 | SQG-----GN-A---MTWYQKRRGQVPRLLIYDTSR----RASGVDPDRFVGS--GSGTDFTLTIN-KLDREDFAVYYCQ   | 88  |
| BAC01689 | 48 | SQS-S---SSA----FLAWLQKPGQAPRLLIYGSSST----RATGIPDRFSGS--GSGADFTLTIS-RLEPEDFATYYCQ   | 112 |
| AAB50880 | 26 | SQS-LLR-RDG-H-NDLEWYLQKPGQSPQLLIYLGST----RASGVDPDRFSGS--GSGTDFTLKII-RVEAEDAGTYBYM  | 94  |
| ABU90586 | 26 | TQG-I-----H-TYLNWYQKPGKAPKLLIYDASN----LEAGVPSFSGS--GSGTDFIFTIS-SLQPEDIGTYCQ        | 89  |
| AAR88380 | 13 | SQS-I-----S-NWLAWYQKPGRAPKLLMYKASS----LKSGVPSRFSGS--GSGTEFTLTIS-SLQSDDFATYYCQ      | 76  |
| AAR88378 | 13 | SQS-I-----S-SYLNWYQKPGKVPKLLIYAASS----LQSGVPSRFSGS--GSGTDFTLTIS-SLQPEDFATYYCQ      | 76  |
| BAC01713 | 48 | SQS-VLY-SSN-NKSYLTWYQKPGQPPRLLIYWAST----RKSGVDRFSAS--RTGTDFTLTIS-SLQAEDEVAVYYCQ    | 117 |
| BAF48996 | 24 | SQS-I-----S-SYLNWYQKPGKAPKLLIYAASS----LQSGVSSRFSGS--GSGTDFTLTIS-SLQPEDFATYYCQ      | 87  |
| 1HZH_L   | 26 | SHS-----IR-S-RRVAVYQHKPGQAPRLLIYHGVSN----RASGISDRFSGS--GSGTDFTLTIT-RVEPEDFALYYCQ   | 90  |
| 1FH5_L   | 26 | SQS-ISN--N-----LHWYQKSHESPRLLIKYASQ----SISGIPSRFSGS--GSGTDFTLTIN-SVETEDFGMYCQ      | 89  |
| JE0241   | 26 | SQS-VLY---N-SKNFLAWYQKPGQ--PKLLI-WANV----RESGVDPDRFRGS--GVGTDFTLTIS-NLQAEDEVAVYYCQ | 91  |
| AAT44350 | 15 | SQS-V---SSS-Y---LAWYQKPGQAPRLLIYGASS----RATGIPDRFSGS--GSGTDFTLTIS-RLEPEDFATYYCQ    | 79  |
| AAT44349 | 15 | SQS-I---TNS-Y---LAWYQKPGQAPRLLIYGASS----RATGIPDRFSGS--GSGTDFTLTIS-RLEPEDFATYYCQ    | 79  |
| AAT44348 | 15 | SQS-V---ISS-Y---LAWYQKPGQAPRLLIYGASS----RATGIPDRFSGS--GSGTDFTLTIS-RLEPEDFATYYCQ    | 79  |
| 3SE9_L   | 26 | ASY-----GH-----MTWYQKPGQPPLLIYFATSK----RASGIPDRFSGS--QFGKYTLTIT-RMEPEDFARYCQ       | 87  |
| AAR88374 | 13 | SQN-I-----N-NYLNWYQKPGKAPKLLIYAASS----LQSGVPSRFSGS--GSGTDFTLTIS-SLQPEDFATYYCQ      | 76  |
| 3U7W_L   | 26 | SQS-----GS-----LAWYQQRPGQAPRLLIYSGST----RAAGIPDRFSGS--RWGADYNLSIS-NLESGDFGVYYCQ    | 87  |
| 1MIM_L   | 26 | SSS-R-S-----YMQWYQKPGTSPKRWIYDTSK----LASGVPARFSGS--GSGTSYSLTIS-SMEAEDAATYYCH       | 88  |
| AAM46656 | 18 | SQS-LVY-SDG-N-TYLNWFQQRPGQSPRLLIYKVSN----WDSGVDPDRFSGS--GSGTDFTLKIS-RVEAEDVGVYYCM  | 86  |
| AAM46662 | 18 | SQS-LLH-SNG-Y-NYLDWYLQKPGQSPQLLIYLGSN----RASGVDPDRFSGS--GSGTDFTLKIS-RVEAEDVGVYYCM  | 86  |
| 1OPG_L   | 26 | SQS-ISN--N-----LHWYQKSHESPRLLIKYASQ----SISGIPSRFSGS--GSGTDFTLTIN-SVETEDFGMYFCQ     | 89  |
| 2XZA_L   | 25 | SSS-NI---GN---NYVSWYQQLPGTAPKLLIYDNNK----RPSGIPDRFSGS--KSGTSATLGIT-GLQTGDEADYYCG   | 90  |
| BAC01672 | 48 | SQY-I-----N-NYLNWYLQKPGSAPKLLIYGASS----LQSGVSSRFSGS--GSGPDFTLTIS-SLQPEDFGTYCQ      | 111 |
| AAX14398 | 27 | SQG-I-----S-SWLAWYQKPGKAPKLLIYAASS----LQSGVPSRFSGS--GSGTDFTLTIS-SLQPEDFATYYCQ      | 90  |
| AAF86917 | 46 | SQS-I---SGS-Y---LAWYQKPGQAPRLLIYGASS----RATGIPDRFSGA--GSGTDFTLTIS-RLEPEDFATYYCQ    | 110 |
| 3NPS_C   | 23 | SSS-NI---GS---NYVSWYQKPGTAPKLLIYDNNQ----RPSGVDPDRFSGS--KSGTSAVLAIT-GLQSEDEADYYCQ   | 88  |
| 3RPI_L   | 26 | NGY-L-----N-WYQRRGKAPKLLIYDGSK----LERGVPARFSGR--RWQOEYNLTIN-NLQPEDVATYFCQ          | 85  |
| CAA09185 | 48 | SQS-I-----SSYLNWYQKPGKAPKLLIYAASS----LQSGVPSRFSGS--GSGTDFTLTIS-SLQPEDFASYCQ        | 111 |
| 3KDM_L   | 25 | TSS-DV---GG-Y-NYVSWYQHPGKAPKLLIYGVTN----RPSGVSNRFSGS--KSGNTASLTIS-GLQAGDEADYYCS    | 91  |
| CAA09183 | 48 | SQS-V-----SRWLAWFQKPGKAPKLLIYEAST----LETGVPSRFSGS--GSGTEFTLTIS-SLQPDLLATYYCQ       | 111 |
| 3CFK_L   | 25 | SSG-AV---TT-S-NYATWVQEKPDHLFTGLIGGTNK----RAPGVPARFSGS--LIGDRAALTIT-GAQTEDEAIYFCA   | 91  |
| ADX65732 | 23 | NQS-VST-N-----LAWYQKPGQAPRLLIFGAST----RATGIPAGFSGS--GSGTEFTLTIS-SLQSEDFAVYYCH      | 86  |
| ADK12723 | 26 | SQS-LVD-TNG-N-TYLIWFHQRPQSPRLLIYQVSK----RDSGVDPDRFSGS--GSGTDFTLKIS-RVEAEDVGVYFCM   | 94  |
| ADX65966 | 23 | SQS-VSS-N-----LAWYQKPGQAPRLLIYGAST----RATGIPARFSGS--GSGTEFTLTIS-SLQSEDFAVYYCQ      | 86  |
| 3DIF_A   | 26 | SQD-VST--A-----VAWFQKPGQSPKLLIYSASY----RYTGVDPDRFTGS--GSGTDFFTTIS-SVQAEDLAVYYCQ    | 89  |
| 1IKF_L   | 26 | SQD-IST--Y-----LNWYQKPDGTVKLLIFYTSR----LRSGVPSRFSGS--GSGTDYSLTIS-NLEQEDIATYFCQ     | 89  |
| ADX66114 | 15 | SQS-VSS-N-----LAWYQKPGQAPRLLIYGAST----RATGIPARFSGS--GSGTEFTLTIS-SLQSEDFAVYYCQ      | 78  |
| 3DGG_A   | 26 | SKS-VST--SG--YSYMHWYQKPGQPPKLLIYLASN----LESGVPARFSGS--GSGTDFTLNIH-PVEEEDAATYYCQ    | 93  |
| ADX65746 | 23 | TQN-I-----NSYLNWYQKSGKAPKLLIYAASN----LESGVPRRISGS--GSGTDFTLTIN-NLQPEDLGTYYCQ       | 86  |
| ADX66208 | 14 | SQS-VSS-Y-----LAWYQKPGQAPRLLIYDASN----RATGIPARFSGS--GSGTDFTLTIS-SLEPEDFAVYYCQ      | 77  |
| AAA59000 | 1  | -----LQPEDFATYYCQ                                                                  | 12  |
| ADX65974 | 23 | SQG-IRN-D-----LGWYQKPGKAPKLLIYAASS----LQSGVPSRFSGS--GSGTEFTLTIS-SLQPEDFATYYCL      | 86  |
| 2ZKH_L   | 26 | SSS-VS---Y-----MYWFQKPGTSPKLIWYSTSN----LASGVPARFRGS--GSGTSYSLTIS-RMEAEDAATYYCQ     | 88  |

|          |    |                                                                                  |     |
|----------|----|----------------------------------------------------------------------------------|-----|
| 1HOD_A   | 26 | SES-VDN--YG--ISFMSWFQKPGQPKLLIYAASN----QSGVPARFSGS--GSGTDFSLNIH-PMEEDDTAMYFCQ    | 93  |
| 1KFA_L   | 26 | SQSLVHS--NG--NTYLHWYLQKPGQSPKLLIYKVS----RFSGFPPDRFSGS--GSGTDFTLKIS-RVEAEDLGVYFCS | 94  |
| ADX65961 | 23 | SQS-ISS-W-----LAWYQKPGKAPKLLIYKASS----LESGVPSRFSGS--GSGTEFTLTIS-SLQPDDFATYYCQ    | 86  |
| AAH92455 | 48 | SQD-I-----RKYLWNWYQKPGQAPKLLIYDASD----LETGVPSRFSGS--GFGTDFSLNIS-SLQTEDVATYYCQ    | 111 |
| ADX66097 | 15 | SQS-ISN-Y-----LNWYQKPGKAPKLLIYAASS----LQSGVPSRFSGS--GSGTDFTLTIS-SLQPEDFATYYCQ    | 78  |
| 2FEC_O   | 26 | SSS-VS---Y-----IHWYQKSGTSPKRWIYDTSK----LTSGVPVRFSGS--GSGTSYSLTIN-TMEEDAATYYCQ    | 88  |
| ADX66082 | 15 | SQG-IRN-D-----LGWYQKPGKAPKLLIYAASS----LQSGVPSRFSGS--GSGTEFTLTIS-SLQPEDFATYYCL    | 78  |
| AAZ24201 |    | -----                                                                            |     |
| ADX65991 | 23 | SQS-VSS-S-----YLAWYQKPGQAPRLLIYGASS----RATGIPDRFSGS--GSGTDFTLTIS-RLEPEDFAVYYCQ   | 87  |
| ADX66171 | 9  | SQS-LGD-S-----LAWYQKPGQAPRLLIYDVS----RATGIPARFSGS--GSGTDFTLTIS-SLELDDFAVYYCQ     | 72  |
| ADX66166 | 9  | SQS-ISS-W-----LAWYQKPGKAPKIMIYKASS----LESGVPSRFSGS--GSGTEFTLTIS-SLQPDDFATYYCQ    | 72  |
| ADX65987 | 23 | SES-ISS-S-----YLAWYQKPGQAPRLLIYGASS----RATGIPDRFSGS--GSGTDFTLTIS-RLEPEDFAVYYCQ   | 87  |
| S52059   | 1  | -----MR-----RVFVQQ                                                               | 8   |
| ADX66104 | 15 | SQT-INN-Y-----LAWYQKPGQAPRLLIYDSSN----RATGVPARFSGS--GSGTDFILTIS-SLEPEDFAVYYCQ    | 78  |
| ADX66080 | 14 | SQS-ISS-H-----LNWYHQKPGKAPKLLIYAASS----LQSGVPSRFSGS--GSGTDFALTIR-SLQPEDFATYYCQ   | 77  |
| ADX66193 | 14 | SQS-VSS-Y-----LAWYQKPGQAPRLLIYDASN----RATGIPARFSGS--GSGTDFTLTIS-SLEPEDFAVYYCQ    | 77  |
| ADX66036 | 15 | SQS-VSS-D-----LAWYQKPGQAPRLLIYAAS----RATGIPARFSGS--ESGTEFTLTIS-SLQSEDALAYFCQ     | 78  |
| ADX66173 | 15 | SQS-VSS-S-----HLAWYHQKPGQAPRLLIYGASS----RATGIPDRFSGS--GSGTDFTLTIS-RLEPEDFAVYYCQ  | 79  |
| ADX66155 | 12 | SQS-INT-W-----LAWYQKPREAPKLLIYKASS----LESGVPSRFSGS--GSGTEFTLTIS-SLQPDDFATYYCQ    | 75  |
| ADX66088 | 14 | SQS-VSS-S-----YLAWYQKPGQAPRLLIYGASN----RATGIPDRFSGS--GSGTDFTLTIS-RLEPEDFAVYYCQ   | 78  |
| ADX66086 | 15 | SQS-ISS-W-----LAWYQKPGKAPKLLIYKASS----LEDGVPSRFSGS--GSGTEFTLTIS-SLQPDDFATYYCQ    | 78  |
| ADX65970 | 41 | SQG-ISS-Y-----LAWYQKPGKAPKLLIYAAS----LQSGVPSRFSGS--GSGTDFTLTIS-CLQSEDFATYYCQ     | 104 |
| ADX65901 | 14 | SQS-VSS-S-----LAWYQKPGQAPRLLIYGAST----RATGIPARFSGS--GSGTEFTLTIS-SLQSEDFATYYCQ    | 77  |
| ADX66185 | 15 | SQS-VSS-S-----YLAWYQKPGQAPRLLIYGASS----RATGIPDRFSGS--GSGTDFTLTIS-RLEPEDFAVYYCQ   | 79  |
| ADX66057 | 13 | SQT-IGI-N-----LAWYQKPGQAPRLLISSAST----RATGIPARFNGS--GSGTEFTLTIS-SLQSEDFAIYSCQ    | 76  |
| ADX66195 | 15 | SQS-ISR-Y-----LNWYQKPGKAPKLLIYAASS----LQSGVPSRFSGS--GSGTDFTLTIS-SLQPEDFATYYCQ    | 78  |
| ADX66212 | 12 | SQG-ISN-S-----LAWYQKPGKAPKLLIYAASR----LESGVPSRFSGS--GSGTDYTLTIS-SLQPEDFATYYCQ    | 75  |
| ADX66109 | 15 | SQS-ISY-W-----LAWYQKPGKAPKLLIYKASN----LQSGVPSRSGS--GSGTEFTLTIS-SLQPDDFATYSCQ     | 78  |
| ADX66187 | 15 | SQS-ISS-W-----LAWYQKPGNPKLLIYKASS----LESGVPSRFSGS--GSGTEFTLTIS-SLQPDDIATYYCQ     | 78  |
| PN0445   | 36 | SQS-IGT--S-----IHWYQRTNGPPRLLIYKASE----SIGIPSRFSGS--GSGTDFTLNIS-SVESEDIADYYCQ    | 99  |
| AAF05692 | 26 | SQS-ISS-Y-----LNWYQKPGKAPKLLIYAASS----LQSGVPSRFSGS--GSGTDFTLTIS-SLQPEDFATYYCQ    | 89  |
| ADX66188 | 11 | SQG-IRN-D-----LGWYQKPGKAPKLLIYAASS----LQSGVPSRFSGS--GSGTEFTLTIS-SLQPEDFATYYCL    | 74  |
| ADX65923 | 12 | SQS-VSS-Y-----FAWYQKPGQAPRLLIYDASN----RATGIPARFSGS--GSGTDFTLTIS-SLEPEDFAVYYCQ    | 75  |
| ADX66002 | 15 | SRD-IIN-Y-----LAWYQKPGQAPRLLIYDTSN----RAPGTPARFSGS--GSGTDFTLTIS-SLEPEDFAVYYCQ    | 78  |
| AAF05691 | 26 | SQG-ISS-A-----LAWYQKPGKAPKFLMYAAS----LQSGVPSRFSGS--GSGTEFTLTIS-SLQPEDFGTYCQ      | 89  |
| ADX66191 | 15 | SQS-VSS-S-----YLAWYQKPGQAPRLLIYGASS----RATGIPDSFSGS--GSGTDFTLTIS-GLEPEDFAVYYCQ   | 79  |
| ADX66139 | 13 | SQS-VSS-S-----YLAWYQKPGQAPRLLIYGASK----RAAGIPDRFSGS--GSGTDFTLTIS-RLEPEDFAVYYCQ   | 77  |
| ADX65981 | 23 | SQS-LLH-SN--GYNLDWYLQKPGQSPQLLIYLSN----RASGVDRFSGG--GSGTDFTLKIS-RVEAEDVGVYYCM    | 91  |
| ADX65903 | 15 | SQS-IGI-Y-----LNWYQRPKAPNLLIYAASS----LQSGVPSRFSGS--GSGTDFALTIS-SLQPEDFATYYCQ     | 78  |
| ADX66075 | 14 | SQV-ISR-W-----LAWYQKPGKAPKALIYKVA----LETGVPSRFSGY--GSGTEFALTIS-SLHPDDFATYYCQ     | 77  |
| 2XTJ_C   |    | -----                                                                            |     |
| ADX65843 | 14 | SQS-VSS-N-----LAWYQKPGQAPRLLIYGAST----RATGIPARFSGS--GSGTEFTLTIS-SLESADFAVYYCQ    | 77  |
| ADX66023 | 15 | SQS-ISN-Y-----LAWYQKPGQAPRLLIYDASN----RATGIPARFSGS--GSGTDFTLTIS-SLEPGDFAVYYCQ    | 78  |
| P01834   |    | -----                                                                            |     |
| ADX66005 | 15 | SQT-IRT-W-----LAWYQVPGKAPKLLIYRAST----LNSRVPSRFSGS--GSGTEFTLTIS-SLQPEDVATYYCQ    | 78  |
| ADX66051 | 13 | SQG-IRN-D-----LGWYQKPGKAPKLLIYAASS----LQSGVPSRFSGS--GSGTDFTLTIS-SLQPEDFATYYCL    | 76  |
| ADX66168 | 1  | ----VNT-W-----LAWYQKPGKAPQLLIYKAST----LASGVPSTFSGS--GSGTEFTLTIG-SLQPEDFATYYCQ    | 61  |

|          |    |                                                                                  |    |
|----------|----|----------------------------------------------------------------------------------|----|
| ADX65997 | 15 | SQS-ISI-W-----LAWYQKPGKAPKLLMYKASS----LESGVPSRFSGS--ESGTEFTLTIS-NLQPDDFATYYCQ    | 78 |
| AAA52924 | 24 | SQG-ISN-Y-----LAWYQKPGKVPKLLIYAASST----LQSGVPSRFSGS--GSGTDFTLTIS-SLQPEDVATYYCQ   | 87 |
| AAD29610 |    | -----                                                                            |    |
| CAC20459 |    | -----                                                                            |    |
| ADX66045 | 7  | SQS-VSS-D-----LAWYQKPGQAPRLLIYAASST----RATGIPARFSGS--ESGTEFTLTIS-SLQSEDLALYFCQ   | 70 |
| ADX66043 | 9  | SQS-VSS-D-----LAWYQKPGQAPRLLIYAASST----RATGIPARFSGS--ESGTEFTLTIS-SLQSEDLALYFCQ   | 72 |
| ADX65887 | 14 | SQS-VSN-K-----LAWYQKPGQSPRLLIYDFTST----RATGVVPRFTGG--GSGTDFTLTIS-SLQSEDFAVYYCQ   | 77 |
| ADX66210 | 8  | SQS-ISS-W-----LAWYQKPGKAPKLLIYKASS----LESGVPSRFSGS--GSGTEFTLTIS-SLQPDDFATYYCQ    | 71 |
| AAA52934 | 24 | SQS-VIS-N-----YLAWYQKPGQAPRLLIYGVSN----RATGIPDRFSGS--GSGTDFTLTIS-RLEPEDFAVYSCQ   | 88 |
| ADX65883 | 10 | SQS-ISN-N-----LNWYQKPGKAPKLLIYGAST----LESGVPSRFSGS--GSGTDFTLTVS-SLQPEDLATYHCQ    | 73 |
| ADX66007 | 15 | SQT-IGR-Y-----LNWYQEPGAAPRLLIYDASS----VQRGVPSRFSGS--SSGTDFTLAIT-SLQPEDSATYWCQ    | 78 |
| ADX66146 | 13 | SHG-IGN-F-----LAWYQKPGKAPKLLITAST----LQLGVPSRFSGS--ASGTDFTLTIS-GLQPEDVATYYCQ     | 76 |
| ADX65872 | 14 | SQG-IMN-Y-----LAWYQQRPGKAPQLLISAASST----LQSGVPSRFSGS--GSGTDFTLTIS-SLQPEDVGTYYCQ  | 77 |
| ADX66066 | 7  | SQR-VTS-N-----VAWYQHKPGQAPRLLIYASST----RATGIPARFTGS--GSGTEFTLTIR-SLQSEDFAVYHCQ   | 70 |
| ADX66064 | 14 | SQS-VRS-N-----LAWYQKPGQAPRLLIYGVSS----RATGIPARFTGS--GSGTEFTLTIS-SLRSDDFGVYYCH    | 77 |
| ADX66047 | 15 | SQS-ISF-F-----LAWYQKPGKAPNLLIYKASS----LQSGVPSRFSGS--GSGTEFTLTIS-SLQPDDSATYYCQ    | 78 |
| ADX66098 | 14 | SQS-MTT-Y-----LAWYQKPGQAPRLLIYDTSI----RATGIPARFSAS--GSGTDFTLTIS-SLEPEDFAVYYCQ    | 77 |
| AAA58922 |    | -----                                                                            |    |
| ADX65921 | 14 | SQS-VSS-S-----YLAWYQKPGQAPRLLIYTASS----RATGIPDRFSGS--GSGADFTLTIS-RLEPEDFAVYYCQ   | 78 |
| ADX66151 | 10 | SQS-ISS-Y-----LNWFQKPGKAPKLLIYAASS----LQGGVPSRFRGS--GSGTDFTLTIS-SLQPEDFATYYCQ    | 73 |
| ADX65850 | 15 | SQT-IDD-Y-----YVAWYQRPQAPRLLIYDASS----RATGVPARFSGS--GSGTDFTLTIN-SLEPDDFAVYYCQ    | 79 |
| AAA58921 |    | -----                                                                            |    |
| ADX65925 | 14 | SQG-IKH-Y-----LAWYQKPGKVPKLLIYGASS----LQSGVPSRFSGS--GSGTDFTLTIN-SLQPEDVATYYCQ    | 77 |
| ADX65929 | 14 | SQS-ISS-F-----LNWYQKPGKAPNLLIPLASN----LQSGVPSRFSGS--GSGTDFTLTIS-SLQPEDFATYYCQ    | 77 |
| ADX65930 | 14 | SQS-VSS-N-----LAWYQKPGQAPRLLIYGAST----RATGIPARFSGS--GSGTEFTLTIS-SLQSEDFAVYYCQ    | 77 |
| ADX66100 | 15 | SET-VSV-N-----VAWYQKPGQPPRLLIYDASQ----RASGTSDRFSGS--GSGREFALTIT-NVQSEDSAIYYCQ    | 78 |
| ADX65918 | 14 | SQS-VSS-N-----YLTWYQKPGQAPRLLIYGASN----RASDIPDRFSGS--GSGTDFTLTIS-RLEPEDFAVYFCQ   | 78 |
| ADX65822 | 15 | SQS-VGR-S-----LAWYQKVGQSPRLLIYGAST----RATGIPVRFSGS--GTGTEFNLTIS-SLQSEDFALYYCQ    | 78 |
| ADX66160 | 10 | QOT-IHN-Y-----LNWYQKPGKAPKLLIYTASS----LQSGVPSRFSGS--GSGTEFTLTIS-SLQPEDFATYFCQ    | 73 |
| ADX65877 | 15 | SQA-INN-F-----VAWFQKPGKVPNLLISAASST----LHSGVPARFSGS--GSGTQFTLTIN-SLQADDVATYYCH   | 78 |
| ADX66116 | 15 | SQS-LSS-W-----LAWYQKPGKAPKLLIYRASS----LESGVPSRFSGS--GSGTEFTLTIS-SLQPDDFATYYCQ    | 78 |
| ADX65832 | 15 | SQR-VRS-S-----LAWYQKPGQAPRLLIYGAST----RATGFPARFSGS--GSGTAFTLTIS-SLQSEDFAVYYCQ    | 78 |
| ADX65808 | 15 | SQG-IRS-R-----LAWYQKPGQAPKLLIYSTSS----LQSGVPSRFSGS--GSGTDFTLTIS-SLQPEDFATYYCQ    | 78 |
| ADX66015 | 12 | SQT-IGR-Y-----LNWYQEPGAAPRLLIYDASS----VQRGVPSRFSGS--SSGTDFTLAIT-SLQPEDSATYWCQ    | 75 |
| AAF66838 | 19 | SQG-IRN-D-----LGWYQKPGKAPKLLIYAASST----LQSGVPSRFSGS--GSGTEFTLTIS-SLQPEDFATYYCL   | 82 |
| ADX65840 | 14 | SQS-VSS-S-----YLVWYQRPQAPRLLIYGTSS----RATGVPRDRFSGS--GSGTDFTLTIS-RLEPDDFAVYYCQ   | 78 |
| ADX65879 | 14 | SQS-VSR-S-----YLAWYQKPGQAPRLLISGVYS----RAAGIPDRFRGS--GSGTDFTLTIS-SLEPEDFAVYFCQ   | 78 |
| ADX66041 | 8  | SQG-INS-Y-----LAWYQKPGKAPKLLIYAASST----LQSGVPSRFSGS--GSGTEFTLTIT-SLQPEDFATYYCQ   | 71 |
| AAF66842 | 22 | SQG-IRN-D-----LGWYQKPGKAPKLLIYAASST----LQSGVPSRFSGS--GSGTEFTLTIS-SLQPEDFATYYCL   | 85 |
| ADX65862 | 14 | SQG-ISN-Y-----LVWYRLKPGKVPPELLIYAASST----LYSGVPSRFSGS--GSGTEFTLTIN-NLQPEDAATYYCQ | 77 |
| ADX65913 | 14 | SQA-IGN-Y-----LSWYQKPGKAPQLLIYDASN----LETGVPSRFSGS--GSGTDFLFTIS-SLQPEDFATYYCQ    | 77 |
| ADX66202 | 14 | SQS-LLH-SN--GYNLDWYLQKPGQSPQLLIYLGSN----RASGVPRDRFSGS--GSGTDFTLKIS-RVEAEDVGYYCM  | 82 |
| AAF66836 | 15 | SQG-ISS-W-----LAWYQKPGKAPKLLIYAASST----LQSGVPSRFSGS--GSGTDFTLTFS-SLQPEDFATYYCQ   | 78 |
| ADX65836 | 22 | SQG-IRN-Y-----LAWYQKPGKVPKFLINDAST----LQSGVPSRFSGS--GSGTEFTLTIS-SLQPDDFGTYCQ     | 85 |
| ADX65766 | 15 | SQS-VDS-D-----LAWYQHKPGQAPRLLIYDVST----RATDTPARFSGS--GSGTEFTLTIS-SLQSDDFAIYYCQ   | 78 |
| ADX65885 | 14 | SQT-ISS-N-----SLAWYQHKSQAPRLLIYGASS----RVTDPDRFSAS--GSGTDFTLTIS-RLEPEDFAVYFCQ    | 78 |
| AAK94869 | 26 | SQS-VSS-----R-GAWYQRPQAPRLLIYGAST----RATGIPTRFSGS--GSGTEFTLTIS-SLQSEDFAVYY--     | 87 |

A37927 -----

AAA52928 24 SQG-ISN-Y-----LAWYQKPGKVPRLLIYAAS-----LQPGVPSRFSGS--GSGTDFTLTIS-SLQPEDVATYYCQ 87

ADX66142 12 SQS-VNK-W-----LAWYQKPGKAPRLLIYKASS-----LESGVPSRFRGS--GSGTEFTLTIS-SLQPDDFATYYCQ 75

ADX65810 9 SQS-VSS-N-----LAWYQKPGQAPRLLIYGAST-----RASGISVRFSGS--GSGTEFTLTIS-SLQSEDFAVYYCQ 72

ABY64708 33 SQS-VSS-S-----YLAWYQKPGQAPRLLIYGASS-----RATGIPDRFSGS--GSGTDFTLTIS-RLEPEDFAVYYCQ 97

ADX65817 15 SQS-ISR-S-----HLAWYQQTTPGQAPRLLIYGASI-----RGTGIPDRFSGS--GSGADFTLTIS-RLEPEDFAVYYCQ 79

ADX65897 14 SQT-VSS-S-----YLAWYQKPGQAPRLLIYGASS-----RAAGIPDRFSGS--GSGTDFTLTIS-RLEPEDYAVYYCQ 78

ADX66090 14 SLA-IMN-Y-----VTWFQKPGKAPKSLIYGASS-----LQSGVPSKFSGS--GYGTDFTLTIS-GLQPEDAATYYCQ 77

AAA52922 24 SQD-IRN-Y-----LNWYQKPGKAPKLLIYDASN-----SETGVPSRFSGS--GSGRDFFTTIS-SLQPEDVATYYCQ 87

ACJ71716 26 SQS-ISS-----Y-LNWYQKPGKAPKLLIYAASS-----LQSGVPSRFSGS--GSGTDFTLTIS-SLQPEDFATYY-- 87

ADX66125 14 SQS-LLH-SN--GNNYLDWYLQKPGQSPQLLIYFLGNS-----RASGVDRFSGS--GSGTDLTLKIS-RVEAEDVGVYFCM 82

ADX65881 14 SQS-LSS-S-----YLAWYQRKPGQAPRLLIYGAYS-----RAAGIPDRFRGS--GSETDFTLTIS-TLEPEDFAVYFCQ 78

ADX66136 13 SQA-ISN-Y-----VAWYQKPGKVPKLLIYGAST-----LQSGVPSRFSGS--GSGTEFTLTIS-SLQPEDVATYYCQ 76

ADX66053 15 SQS-VGS-SQRVSGSYLAWYQKPGQAPRLLIYGASS-----RATGISDRFSGS--GSGTDFTLTIS-RLEPEDFAVYYCQ 85

ADX65782 13 SQV-ISN-Y-----LAWYQKPGKVPPELLIYAAS-----LQSGVPSRFSGG--GSGTDFTLTIS-SLQPEDVATYYCQ 76

ADX66049 14 NKS-VNG-L-----SLAWYQKPGQAPRLLIYGASN-----RASGVDRFSGS--GSGTDFSLTIS-RLEPDDFAVYYCQ 78

ACJ71718 27 SQS-VLY-SSN-NKNYLAWYQKPGQPPKLLIYWAST-----RESGVDRFSGS--GSGTDFTLTIS-SLQAEDVAVYYCQ 96

ADX66134 13 SQG-IGN-D-----LGWFQKPGKAPKRLIYATSS-----LQSGVPSRFSGS--GSGTEFTLTIS-SLQPEDFATYYCL 76

ADX65764 4 HEN-IST-K-----VAWYQRPGQAPRLLIYDASS-----RATDVPLRFSGS--GSGTDFTLTIS-SLLSEDFAIYYCQ 67

ADX65802 15 SQD-MSN-S-----LNWFQKPGKAPKLLIYDASH-----LEAGVPSRFSGS--GSGTTFSTTIS-SLQLDDLATYYCQ 78

ADX66072 15 SQN-VIS-S-----FLAWYQHKPGQAPRLLIYGAST-----RATGVDRFSGS--GSGTDFTLTIS-RLEPEDFVYYCQ 79

ADX65759 14 SQT-INT-Y-----LNWYQHKPGNAPKLLIYAASS-----LQTVPSRFSGS--GSGTDFTLTIS-SLQPEDSAIYYCQ 77

AAF66840 16 SQG-IRN-D-----LGWYQKPGKAPKRLIYAASS-----LQSGVPSRFSGS--GSGTEFTLTIS-SLQPEDFATYYCL 79

ADX66205 14 SQS-VSS-S-----YLAWYQKPGQAPRLLIYGASS-----RATGIPDRFSGS--GSGTDFTLTIS-RLEPEDFAVYYCQ 78

ADX65916 15 SQS-VLS-NSN-NKNYLAWYQKPGQPPKLLIYWAST-----RESGVDRFSGS--GSGTDFTLTIS-SLQAEDVATYYCQ 84

ADX65874 14 SES-ITT-F-----VNWFHQKPGKAPKLLISGTSS-----LQSEVPSRFRGS--GYGTDFTLTIS-GLQPEDFATYYCQ 77

ADX65827 14 SQS-VSS-S-----YLAWYQKPGQAPRLLIYGASS-----RATGIPDRFSGS--GSGTDFILTIS-RLEPEDFAVYYCQ 78

ADX66148 1 -----LAWYQKPGKAPKLLIYAAS-----LQSGVPSRFSGS--GSGTEFTLIIS-SLQPEDFATYYCQ 57

ADX65933 15 SQS-VSS-S-----YLAWYQKPGQAPRLLIYGASS-----RVTGIPDRFSGS--GSGTDFTLTIS-RLESEDFAVYYCQ 79

ADX66011 15 SQD-VSS-Y-----LNWFQVKPGKAPKLLIYVAASH-----LQSGVPSRFSGN--GSGTDFNFTIN-SLQPEDSATYCCQ 78

ADX66140 11 SQS-LVR-SD--GNTYLSWYQQRPGQPPRLLIYKISN----RFSGVDRFSGS--GAGTDFTLKIS-RVEAEDVGIYYCM 79

ADX65955 23 SQS-LLH-SN--GNNYLDWYLQKPGQSPQLLIYFLGNS-----RASGVDRFSGS--GSGTDFTLKIS-RVEAEDVGVYYCM 91

AAS47840 26 SQS-VLY-TTK-NKNHLAWYQKPGQPPKLLIYWAST-----RESGVDRFSGS--GSGTDFSLTIT-NLQAEDVALYYCH 95

ADX66095 14 SQY-ISN-Y-----LNWYQKPGKAPNLLIYGVSS-----LQSGVPSRFSGS--ASGTDFTLTIS-SLQPEDFATYYCQ 77

ADX66175 14 SQS-VLY-SYN-NKNYLAWYQKPGQPPKLLIYRAST-----RESGVDRFSGS--GSGTDFTLTIS-SLQAEDVAVYYCQ 83

ADX66008 7 SQA-INI-F-----LNWYQKPGKAPKLLIYAASY-----LQYGVPSRFSGS--GSGTVFTLTIS-SLQPEDFATYYCQ 70

ADX65889 14 SQS-VLY-SSN-NKNYLVWYQKPGQPPKLLIYWAST-----RESGVDRFSGS--GSGTDFTLTIS-SLQAEDVAVYYCQ 83

ADX66030 7 SQS-VGS-----S-LAWYQKPGQAPRLLIYGASN-----RATGIPARFSGS--GSGTEFTLTIS-GLQSEDFAVYY-- 68

AAA52938 24 SHR-VNN-----NFLAWYQKPGQAPRLLIYGAST-----RATGIPDRFSGS--GSGTDFTLTIS-RLEPDDFAVYY-- 86

ADX66061 8 SQS-VSS-S-----SLAWYQKPGQAPRLLIYVYASI-----RATGIPDRFSGS--GSATDFTLTIS-RLEPEDFAVYYCQ 72

ABY64710 33 SQS-VSS-S-----YLAWYQKPGQAPRLLIYGASS-----RATGIPDRFSGS--GSGTDFTLTIS-RLEPEDFAVYYCQ 97

ADX66039 7 EYN-IYS-F-----LNWYQKPGQAPPELLISAASN-----LQSGVPSRFSGS--GSGTHFSLTIS-SLQPEDFATYYCQ 70

ADX65907 14 SQS-LLH-SN--GHNYLDWYLQKPGQSPHVLIIYFLGNS-----RASGVDRFSGS--GSGTEFTLKIS-RVEAEDVGVYYCM 82

ADX65791 14 SHH-ISN-Y-----VCWYQKPGKAPKLLIYDASN-----LEAGVPSRFSGS--GYGTDFFTIN-SLQPEDFATYYCQ 77

ADX65859 11 SQS-VSS-T-----YLAWYQQTTPGQAPRLLVFATSIN-----RATGIPDRFNCS--GSGTDFTLTIN-RLEPEDFAVYYCQ 75

PL0106 46 SQS-VSS-----YLAWYQRPGQAPRLLIYDASN-----RATGIPARFSGS--GSGTDFTLTIS-SLEPEDFAVYY-- 107

ADX65814 15 SQD-IRS-Y-----LAWYQKPGKAPKLLIYGASS-----LQSGVPRFTGS--VTGTDFTLTIS-SLQPEDVATYYCQ 78

|          |    |                                                                                  |     |
|----------|----|----------------------------------------------------------------------------------|-----|
| ADX65849 | 14 | SQD-IRN-Y-----LAWFQQKAGQAPKLLIYAASST----LRSGVPSFSAS--GSGTDFTLTIG-SLQPEDVATYYCQ   | 77  |
| ADX65770 | 15 | SQA-IST-Y-----LNWFQFKPGAAPQLLIYAASS----LQGGVPLRFSGL--GSGTNFTLTIR-DLQPEDFATYYCQ   | 78  |
| AAB51622 | 18 | SQS-LLH-SD--GKTYLYWYLQKPGQSPQLLIYEVSNN----RFSGVPRFSGS--GSGTDFTLKIS-RVEAEDVGVYYCM | 86  |
| AAD22771 | 48 | SQS-VSI-----N-LAWYQQKPGQAPRLLIYDAST----RATGIPARFRGS--GSGTDFTLTIS-SLQSEDFAVYY--   | 109 |
| AAK94791 | 26 | SQS-VSS-----N-LAWYQQKPGQAPRLLIYGAST----RATGIPARFRGS--GSGTEFTLTIS-SLQSEDFAVYY--   | 87  |
| ADX65829 | 14 | SQX-VNX-C-----LXWYQQKPGXPPRLLIYDASN----RATGXPRFSGS--GSGTDXTXTIS-SLEPXDFAVYYCQ    | 77  |
| ADX65794 | 15 | SRF-TST-F-----LNWYQKPKGQPPKLLIHAVSN----LARGVPRFSGS--GSGANFTLAIS-SLQPEDFATYYCQ    | 78  |
| ADX65800 | 15 | SEN-IRT-Y-----LNWYRQRPGKAPNLLIYEASS----LQIGIPSRFSGS--GSGTDFNLTIS-SLHPEDFATYFCQ   | 78  |
| ACJ71715 | 26 | SQS-ISS-----Y-LNWYQQKPGKAPKLLIYAASS----LQSGVPSRFSGS--GSGTDFTLTIS-SLQPEDFATYY--   | 87  |
| ADX65909 | 14 | SQS-VSX-KFQ-Q-----FQQKPGQPPKVLIFWASP----RESGVPRFTGS--GSGTGFTLTIS-SLQAEDVAVYYCQ   | 77  |
| ADX65875 | 15 | SQS-LLH-RN--GNNYLDWYLQKPGQSPQLLIYLGSN----RASGVPRFNGS--GSGTDFTLKIS-RVEAEDVGVYYCM  | 83  |
| ADX66162 | 5  | SQS-VSR-S-----YLAWYQQKPGQAPRLLIYGASN----RATGIPDRFSGS--GSETDFTLTIS-RLEPEDFAVYHCQ  | 69  |
| ADX65789 | 14 | SQS-VDF-N-----YLAWYQQKPGQAPRLLIYDASR----RATGIPDRFSGS--GSGTDFTLTIR-GLEPEDFAVYYCH  | 78  |
| ADX66113 | 15 | SQD-IAN-Y-----LNWYQQRPGQAPKLLIFDSSST----LQPGVPRFSGS--GSGTDFFTTIS-GLQPEDIATYYCQ   | 78  |
| ADX65773 | 1  | -----LAWSQQNPGQAPKLLMYGAST----LQSGVPSRFSGS--GSGTDFTLTIN-SLQPEDFGTYCQ             | 57  |
| ADX66181 | 13 | SQS-ISI-W-----LAWYQQKPGQAPNLLIYKASS----LESGVSSRFSGS--GSGTEFTLTIS-SLQPDFFGTYYCQ   | 76  |
| ADX66131 | 14 | SQV-ITN-S-----LAWFQQKPGKAPKLLLSGAST----LESGVPSRFSGG--GSGADYTLTIS-SLQPEDFATYYCQ   | 77  |
| ADX65757 | 11 | SRW-IGE-S-----LNWYQHKSGQAPKLLIFAATR----LQGGFPERFSGN--GSGTDFALTIN-GLQSADFATYYCQ   | 74  |
| 1805324B | 46 | SQS-VSS-----YLAWYQQRPGQAPRLLIYDASN----RATGIPARFRGS--GSGTDFTLTIS-SLEPEDFAVYY--    | 107 |
| ADX66027 | 5  | NQT-IAN-R-----FLAWYQQKLGQAPRLLIYDASS----RATDIPDRFSGG--GSGTDFTLTIS-KLEPEDFAVYYCQ  | 69  |
| AAF66834 | 16 | SQS-LVY-SDG-N-TYLNWFQQRPGQSPRLLIYKVSNN----WDSGVPRFSGS--GSGTDFTLKIS-RVEAEDVGVYYCM | 84  |
| ADX66092 | 15 | SQT-ILY-LLN-NKNALSWYQQKPGQPPKLLIYWAST----RESGVPRFSGS--GSGTDFTLTIS-SLQAEDVAVYYCQ  | 84  |
| ADX66012 | 15 | DES-VQT-PN--GKTWLYWYLQRPGQSPQILYIELSS----RFSGVSERFSAS--GSGTSFTLNIS-RVETEDVGIYYCM | 83  |
| ADX65845 | 15 | SQS-VLH-SSN-NKNYVAWYQQKAGQPPRLLIYWAST----RESGVPRFSGS--GSGTDFALTIS-SLQAEDVAVYYCQ  | 84  |
| ADX65820 | 15 | SQS-VLY-TPK-NKNYLAWYQQKPGQPPKLLIYRAST----RESGVPERFRGS--GSGTDFTLTIS-SLQAEDVAIYYCQ | 84  |
| AAT84392 | 26 | SQS-V-S-----SYLAWYQQKPGQAPRLLIYDASN----RATGIPARFRGS--GSGTDFTLTIS-SLEPEDFAVYY--   | 87  |
| AAB30174 | 48 | SQS-VSS-----N-LAWYQQKPGQAPRLLIYGASI----RATGIPDRFSGS--GSGTEFTLTIS-SLQSEDFAVYY--   | 109 |
| AAF05690 | 26 | SQG-IST-----Y-LVWYQQKPEKAPKSLIYAASN----LQSGVPSRFSGS--GSGTDFTLTIS-SLQPEDFATYY--   | 87  |
| ADX66063 | 14 | SYE-VSS-S-----FLAWYQQKPGQAPRLLIYGASR----RATGIPDRFSGS--GSGTDFTLTIR-RLEPEDSAVYYCQ  | 78  |
| AAA52947 | 24 | GQS-ISS-----NYLAWYQQKPGQAPRLLIYGASN----RATGIPDRFSGS--GSGTDFTLTIS-RLEPEDFAVYY--   | 86  |
| ADX65856 | 15 | SQA-LRD-Y-----VAWYQQPPGKVPKLLIYGASA----LQSGVPSRFTGA--GYGADFLLTIS-SLQPEDVGTYYCQ   | 78  |
| ABV21630 | 26 | SQS-IDI-----Y-VNWYQHKAGKVPKLLMHTASS----LESGVPRFSGS--GSGTDFTLTIS-GLQPEDFATYY--    | 87  |
| AAT84394 | 26 | SQS-V-S-----NYLAWYQQKPGQAPRLLIYDASN----RATGIPPRFSGS--GSGTDFTLTIS-SLEPEDFAVYY--   | 87  |
| CAA66114 | 24 | SQS-VS-----TYLAWYQQKPGQAPRLLIYGTSN----RATGIPDRFSGS--GSGTDFTLTIS-RLEPEDFVYY--     | 85  |
| ACJ71713 | 26 | SQS-V-S-----SYLAWYQQKPGQAPRLLIYDASN----RATGIPARFRGS--GSGTDFTLTIS-SLEPEDFAVYY--   | 87  |
| ADX65768 | 1  | -----AWHRQRPGKRPPELLIYGASI----LQSGAPARFSGR--GSGTDFTLTIS-SLQPEDVATYYCQ            | 56  |
| AAB41732 | 46 | SQS-IST-----N-LAWYQQKPGQPPRLLIFYGAST----RATGIPARFRGS--GSGTQFTLTIS-SLQSEDFAIYY--  | 107 |
| AAA52918 | 24 | SQR-VNS-----NYLAWYQQKPGQTPRVVIYSTSR----RATGVPRFSGS--GSGTDFTLTIS-RLEPEDFAVYY--    | 86  |
| AAA51018 | 45 | SQS-LNS-----N-LAWYQQKPGQAPRLLMYDIST----RATGIPARFRGS--GSGTDFTLTIS-SLQSEDFAVYY--   | 106 |
| ADX65805 | 14 | SQS-VLY-SSN-NKNYLAWYQQKPGQPPKLLIYWAST----RESGVPRFSGS--GSGTDFTLTIG-SLQAEDVAVYYCQ  | 83  |
| ADX65761 | 14 | SQS-VSF-GSS-NLNYLAWYQQKPGQPPKLLIYWASS----RDDGVPRFSGS--GSGTDFTLTIS-SLQTEDVALYYCQ  | 83  |
| CBZ39886 | 26 | SQS-ISS-----Y-LNWYQQKPGKAPKLLIYAASS----LQSGVPSRFSGS--GSGTDFTLTIS-SLQPEDFATYY--   | 87  |
| 1102971D | 26 | SQS-VSS-----SYLAWYQQKPGQAPRLLIYGASS----RATGIPNRFSGS--GSGTDFTLTIS-RLEPEDFAVYY--   | 88  |
| 2EIZ_A   | 26 | SQS-IGN-----N-LHWYQQKPGQAPRLLIYASQ----SISGIPARFRGS--GSGTEFTLTIS-SLQSEDFAVYY--    | 87  |
| CCD30936 | 26 | SQS-ITG-----NWWAWYQQRPGKAPRLLIYRGAA----LLGGVPSRFSGS--AAGTDFTLTIG-NLQAEDFGTFY--   | 88  |
| AAV16616 | 30 | SQS-V-S-----SYLAWYQQKPGQAPRLLIHDASN----RATGIPARFRGS--GSGTDFTLTIS-SLEPEDFAVYY--   | 91  |
| ABC67113 | 28 | SQS-V-S-----SYLAWYQQKPGQAPRLLIYDASN----RATGIPARFRGS--GSGTDFTLTIS-SLEPEDFAVYY--   | 89  |

|          |    |                                                                                   |     |
|----------|----|-----------------------------------------------------------------------------------|-----|
| ABC66848 | 28 | SQS-V-S-----SNLAWYQOKPGEAPRLLIYGAST----RATGIPARFSGS--GSGTDFTLTIS-SLEPEDFAVYY--    | 89  |
| CAB93577 | 26 | SQS-VNS-----N-LAWYQOKPDQAPRLLIYTAST----RATGVPARFSGS--GSGTEFTLTIS-SLQSDDFAVYY--    | 87  |
| AA16624  | 27 | SQS-VSS-----YLAWYQOKPGQAPRLLIYDASN----RATGIPARFSGS--GSGTDFTLTIS-SLEPEDFAVYY--     | 88  |
| AAB41731 | 46 | SQS-LSK-----SLAWYQOKPGLAPRLLIYDVSK----RATGVPARFSGS--GSGTDFALTIS-SLEPEDFAIYY--     | 107 |
| ABC67088 | 28 | SQS-VGT-----NLAWFQOKPGQAPRLLIYEASN----RATGIPARFSGS--GSGTDFTLTIS-RLEPEDFALYY--     | 89  |
| AA16615  | 28 | SQS-V-S-----SYLAWYQOKPGQAPRLLIYDASN----RATGIPARFSGS--GSGTDFTLTIS-SLEPEDFAVYY--    | 89  |
| ADX65749 | 23 | SQN-MRS-----D-LAWYQOKPGQAPRLLIFGASS----RATDIPARFSGT--GSGTEFSLTIS-SLQSEDFAVYY--    | 84  |
| AA16619  | 28 | SQS-V-S-----SYLAWYQOKPGQAPRLLIYDASN----RATGIPARFSGS--GSGTDFTLTIS-SLEPEDFAVYY--    | 89  |
| CAG27043 | 26 | SQS-IGS-----N-LHWYQOKPDQSPKLLIKYASQ----SFGVPSRFSGS--GSGTDFTLTIN-SLEAEDAATYY--     | 87  |
| AAT86033 | 26 | SQS-ISS-----F-LNWYQOKPGKAPKLLIYAASS----LQSGVPSRFSGS--GSGTDFTLTIS-SLQPEDFATYY--    | 87  |
| ABC67137 | 28 | SQS-V-S-----RFLAWYQOKPGQAPRLLIYDASN----RATGITARFSGS--GSGTDFTLTIS-SLEPEDFAVYY--    | 89  |
| ADX65798 | 22 | SES-LLY-SDG-N-TYLCWLHQRPQSPRLLIHQVSN----RDSGVPDRFSGN--GSDTNFTLKIS-RVEAEDVGIYYCM   | 90  |
| ABC66851 | 28 | SQS-VSS-----YLAWYQOKPGQAPRLLIYDASN----RATGIPARFSGS--GSGTDFTLTIS-SLEPEDFAVYY--     | 89  |
| AAL96507 | 24 | SQS-VTN-----YLAWYQOKPGQAPRLLIYGASN----RATGIPARFSGS--GSGTDFTLTIS-SLEPEDFAVYY--     | 85  |
| ABA71382 | 26 | SQS-VSS-----HLAWYQOKPGQAPRLLIFETSD----RAAGIPARFSGS--GSGTDFTLTIS-SLEPEDSAVYY--     | 87  |
| AAT84400 | 26 | SQS-ISS-----Y-LNWYQOKPGKAPKLLIYAASS----LQSGVPSRFSGS--GSGTDFTLTIS-SLQPEDFATYY--    | 87  |
| ABC67089 | 28 | SQS-VGT-----NLAWFQOKPGQAPRLLIYEASN----RATGIPARFSGS--GSGTDFTLTIS-RLEPEDFALYY--     | 89  |
| AAZ32299 | 25 | SQS-VSS-----YLAWYQOKPGQAPRLLIYDASN----RATGIPARFSGS--GSGTDFTLTIS-SLEPEDFAVYY--     | 86  |
| ACF34414 | 26 | RSN-IGA----G-YHVHWYQQLPGTAPKLLIYADTN----RPSGVPDRFSGS--KSGTSASLAIT-GLQAEDEAEYYCQ   | 91  |
| AAB53267 | 46 | SQT-VSS-----TYLAWYQOKPGQAPRLLIYGASS----RATGIPDRFSGS--GSGTDFTLTIS-RLEPADFAVYY--    | 108 |
| AAL96511 | 24 | SQS-VGS-----HLAWYQOKPGQAPRLLMYDASN----RATGIPARFSGS--GSGTDFTLTIS-SLEPEDFALYH--     | 85  |
| AAF05689 | 26 | SQG-ISN-----Y-LAWYQOKPGKVPNLLIYGAST----LQSGVPSRFSGS--GSGTDFTLTIS-SLQPEDVATYY--    | 87  |
| AAA59100 | 48 | SQS-ISS-----Y-LNWYQOKPGKAPKLLIYAASS----LQSGVPSRFSGS--GSGTDFTLTIS-SLQPEDFATYY--    | 109 |
| CAA66113 | 24 | SQS-ISS-----W-LAWYQOKPGKAPKLLIYKASS----LESGVPSRFSGS--GSGTEFTLTIS-NLQPDSDATYY--    | 85  |
| AAB26430 | 48 | SQG-ISS-----W-LAWYQOKPGKAPKLLIYAASS----LQSGVPSRFSGS--GSGTDFTLTIS-SLQPEDFATYY--    | 109 |
| ABC66966 | 28 | SQS-VSS-----YLAWYQOKPGQAPRLLIYDASN----RATGIPARFSGS--GSGTDFTLTIS-SLEPEDFAVYY--     | 89  |
| AAA86784 | 39 | SQS-VSS-----YLAWYQOKPGQAPRLLIYDASN----RATGIPATFSGS--GSGTDFTLTIS-SLEPEDFAVYY--     | 100 |
| AAB53268 | 46 | SQS-VSS-----SYLAWYQOKPGQAPRLLIYGASS----RATGIPDRVSGS--GSGTDFTLTIS-RLEPEDFAMYY--    | 108 |
| ADX65785 | 1  | -----LAWYQOKPGEAPKLLIYGAST----LQSGVPSRFSGS--GSGTEFTLTIN-SLQPEDFGTYFCQ             | 57  |
| BAC01816 | 48 | SSN-IGA----G-YDVHWYQQLPGTAPKLLIYGNSN----RPSGVPDRFSGSK--SGTSASLAIT-GLQAEDEADYYCQ   | 113 |
| CAJ57364 | 26 | SQS-ISS-----Y-LNWYQOKPGKAPKLLIYAASS----LQSGVPSRFSGS--GSGTDFTLTIS-SLQPEDFATYY--    | 87  |
| 3H42_L   | 26 | SSN-IGA----G-YDVHWYQQLPGTAPKLLISGNSN----RPSGVPDRFSGS--KSGTSASLAIT-GLQAEDEADYYCQ   | 91  |
| AAH73769 | 45 | SSN-IGA----G-YDVHWYQQLPGTAPRLLIYGNSN----RPSGVPDRFSGS--KSGTSASLAIT-GLQAEDEADYYCQ   | 110 |
| AAT84385 | 26 | SQS-VSS-----SYLAWYQOKPGQAPRLLIYGASS----RATGIPDRFSGS--GSGTDFTLTIS-RLEPEDFAVYY--    | 88  |
| AAV28163 | 43 | SQS-VSF-NSN-SKNFLAWYQOKPRQPPELLIYWAST----RESGVPDRFSGS--GSETDFTLTIS-SLQAEADVAVYYCQ | 112 |
| AEO16794 | 45 | SSN-IGA----G-YDAYWYQQLPGTAPKLLIYGNSN----RLSGVPDRFSAS--KSGTSASLAIT-GLQAEDEADYYCQ   | 110 |
| ADX65778 | 14 | SQS-VFY-SSN-NKNYLAWYQOKPRQPPELLIYWAST----RSGVPSRFSGS--GSGTDFTLTIS-SLQAEADVAVYYCQ  | 83  |
| S54905   | 26 | SQS-VSS-----YLAWYQOKPGQAPRLLIYDASR----RATGIPARFSGS--GSGTDFTLTIS-SLEPEDFAVYY--     | 87  |
| AAB25738 | 26 | SQS-VAT-----YLAWYQHKPGQAPRLLIYDASN----RATGIPARFSGS--GSGTDFTLTIS-SLEPADFAVYY--     | 87  |
| B26555   | 26 | SQS-ISS-----N-LAWYQOKPGQAPRLLIYAASST----RATGIPARFSGS--GSGTEFTLTIS-SLQSEDFAVYY--   | 87  |
| 3PIQ_L   | 26 | --N-IA-----N-KNVHWYQOKPGQAPVLIYYDDDD----RPSGIPDRFSGS--NSGNTATLTIS-RVEAGDEADYYCQ   | 88  |
| BAC01836 | 48 | SSN-IGA----G-YDVHWYQQLPGTAPKLLIYGNSN----RPSGVPDRFSGSK--SGTSASLAIT-GLQAEDEADYYCQ   | 113 |
| 3P30_L   | 26 | SSN-IG-----N-NYVYWYQQLPGTAPKLLIYKNNI----RPSGVPDRFSGS--KSGTSASLAIS-GLRSEDEADYYCA   | 90  |
| AA16591  | 28 | SQS-VSS-----SYLAWYQOKPGQAPRLLIYGASS----RATGIPARFSGS--GSGTDFTLTIS-SLEPEDFAVYY--    | 90  |
| ADX65734 | 23 | SQS-VLS-SSN-NKDYLAWYQOKPGQPPKLLTYWAST----RQSGVPSRFSGS--GSGTDFTLTIS-SLQAEADVAVYYCQ | 92  |
| AAC41918 | 26 | SQS-VSS-----N-LAWYQOKPGQAPRLLIYGAST----RATGMPARFRGS--GSGTEFTLTIS-SLQSEDFAVYY--    | 87  |
| AA16617  | 28 | SQG-V-S-----SYLAWYQOKPGQAPRLLIYDASN----RATGIPARFSGS--GSGTDFTLTIS-SLEPEDFAAYY--    | 89  |

|          |    |                                                                                  |     |
|----------|----|----------------------------------------------------------------------------------|-----|
| AAM46647 | 46 | SQR-VGR-----TNVAWYQKFGQAPRLLIYDASS----RATGIPDRFSGS--GSGTDFTLTIS-RMEPEDFAIYY--    | 108 |
| ABA71381 | 26 | SES-VRG-----YLIWYQKRGQAPRLLISDTSN----RATGIPARFSGS--GSGTDFTLTIS-SLEPEDFAVYY--     | 87  |
| AAH20233 | 45 | SSN-IGA-----G-YDVHWYQQLPGTAPKLLIYGNSN----RPSGVPDRFSGS--KSGTSASLAI--GLQAEDEADYYCQ | 110 |
| AAH22098 | 45 | SSN-IGA-----G-YDVHWYQQLPGTAPKLLIYGNSN----RPSGVPDRFSGS--KSGTSASLAI--GLQAEDEADYYCQ | 110 |
| JE0246   | 26 | SSN-IGA-----G-YPVHWYQQLPGAAPKLLISDNYN----RPSGVPARFSGS--KSGTSASLAI--GLQAEDEADYYCQ | 91  |
| BAC01586 | 26 | SQS-VSS-----N-LAWYQKPGQAPRLLIYGAST----RATGIPARFSGS--GSGTEFTLTIS-SLQSEDFAVYY--    | 87  |
| AAH54883 | 45 | --N-IG-----A-KSVHWYQKTDQAPVLVVDHND----RPSGIPERFSGS--NSGNTATLTIS-RVEPEGDEADYFCQ   | 107 |
| AAC37556 | 14 | SQS-ITS-----SLAWYQKPGQAPRLLIYDASN----RDTGIPARFSGR--GSGTDFTLTIS-SLEPEDFAVYY--     | 75  |
| CAJ57360 | 26 | SQG-ISR-----H-LAWYQEKPGKVPKLLIYAAS--LQSGVPSRFSGS--GSGTDFTLTIS-CLQPEDVATYY--      | 87  |
| S25744   | 45 | RSN-VG-----S-NNVNWYQQLPGTAPKLLIYNNQ----RPSGVPDRFSGS--KSGTSASLAI--GLQSEDEADYYCA   | 109 |
| CAJ57363 | 26 | SQS-VSS-----SYLAWYQKPGQAPRLLIYGASS----RATGIPDRFSGS--GSGTDFTLTIS-RLEPEDFAVYY--    | 88  |
| AAA59089 | 48 | SQS-ISS-----Y-LNWYQKPGKAPKLLIYAASS--LQSGVPSRFSGS--GSGTDFTLTIS-SLQPEDFATYY--      | 109 |
| AA16597  | 26 | SQS-V-S-----SYLAWYQKPGQAPRLLIYDASN----RATGIPARFSGS--GSGTDFTLTIS-SLEPEDFAVYYCQ    | 89  |
| AAT84387 | 26 | SQS-VSS-----SYLAWYQKPGAPRLLIYDASS----RATGIPDRFSGS--GSGTDFTLTIS-RLEPEDFAVYY--     | 88  |
| S23628   | 26 | SQS-VSS-----YLAWYQKPGQAPRLLIYDASN----RATGIPARFSGS--GSGTDFTLTIS-SLEPEDFAVYY--     | 87  |
| ADX65755 | 14 | SRS-LLA-TD--GYNLDWYLHKPGQPQLLIYLGSK--RASGVPERFSGS--GSGRNFTRLIS-RVEAEDVGIYYCM     | 82  |
| AAA20447 | 46 | SQS-VSS-----YLAWYQKPGQAPRLLIYDASN----RATGIPARFSGS--GSGTDFTLTIS-SLEPEDFAVYY--     | 107 |
| AAD16616 | 19 | SQS-VNS-----N-LAWYQKPGQAPRLLIYGAST----RATGIPARFSGS--GSGTEFTLTIS-SLQSEDFAVYY--    | 80  |
| AAC41922 | 26 | SQS-VSS-----N-LAWYQKPGQAPRLLIYGAST----RATGIPARFSGS--GSGTEFTLTIS-SLQSEDFAVYY--    | 87  |
| BAC01795 | 48 | AL---PK-----Q-Y-AYWYQKPGQAPVLVIYKDE--RPSGIPERFSGS--SGTTVTLTIS-GVQAEDEADYYCQ      | 110 |
| CAG27030 | 29 | SQS-VNN-----N-LAWYQKPGQAPRLLIYGAST----RATGIPARFSGS--GSGTEFTLTIS-SLQSEDFAVYY--    | 90  |
| 3Q6F_A   | 26 | --N-IA-----N-KNVHWYQKPGQAPVLVIYDSD--RPSGIPDRFSGS--NSGNTATLTIS-RVEAGDEADYYCQ      | 88  |
| AA16600  | 25 | SQS-V-S-----SYLAWYQKPGQAPRLLIYDASN----RATGIPARFSGS--GSGTDFTLTIS-SLEPEDFAVYYCQ    | 88  |
| ABY48868 | 26 | SHS-VSR-----N-LAWYQKPGRAPRLLIYDTS--RATGIPARFSGS--GSGTEFTLTIS-SLQSEDFAVYY--       | 87  |
| ABC66846 | 28 | SQS-ISS-----Y-LNWYQKPGKAPKLLIYAASS--LQSGVPSRFSGS--GSGTDFTLTIS-CLRSEDFATYY--      | 89  |
| AAH73770 | 45 | SSN-IGA-----G-YGVHWYQQLPGTAPKLLISNNSN----RPSGVPDRFSGS--KSGTSASLAI--GLQAEDEADYYCQ | 110 |
| AA16599  | 26 | SQS-V-S-----SYLAWYQKPGQAPRLLIYDASN----RATGIPARFSGS--GSGTDFTLTIS-SLEPEDFAVYYCQ    | 89  |
| ABA26038 | 26 | SQS-VSS-----N-LAWYQKPGQAPRLLIYGAST----RATGIPARFSGS--GSGTEFTLTIS-SLQSEDFAVYY--    | 87  |
| S20631   | 46 | SQK-IKN-----NYLAWYQKPGQAPSLVIYGVSI--RATGIPDRFSGS--GSETDFTLTIS-RLEPEDFAVYY--      | 108 |
| BAC01771 | 48 | SSN-IGA-----G-YDVHWYQQLPGTAPKLLIYDIN--RPSGVPDRFSGS--SGTSASLAI--GLQAEDEADYYCQ     | 113 |
| AA16618  | 28 | SQS-V-S-----SYLAWYQKPGQAPRLLIYDASI--RATDIPARFSGS--GSGTDFTLTIS-SLEPDDFAVYY--      | 89  |
| CAJ57362 | 26 | SQS-ISS-----Y-LNWYQKPGKAPKLLIYAASS--LQSGVPSRFSGS--GSGTDFTLTIS-SLQPEDFATYY--      | 87  |
| AAH30984 | 45 | RSN-IG-----S-NYVWYQVPGTAPKLLIYRNDQ--RPSGVPDRFSGS--KSGTSASLAI--GLRSEDEADYYCA      | 109 |
| AAV28164 | 43 | SQS-ILS-SSN-NNNYLAWYQKPGQSPNLLIYWAST--RESGVPDRFSGS--GSGTDFTLTIS-SLQAEDEVAVYYCQ   | 112 |
| CAD43025 | 26 | SQS-VSS-----YVAVYQKPGQAPRLLIYDASN----RATGIPARFSGS--GSGTDFTLTIS-SLEPEDFAVYY--     | 87  |
| 1AQK_L   | 26 | NSN-IGA-----G-FTVHWYQHLPGTAPKLLIFANTN--RPSGVPDRFSGS--KSGTSASLAI--GLQAEDEADYYCQ   | 91  |
| ABA71388 | 26 | SQG-VGT-----W-LAWFQKPGKPKLLIYGASN--LQSGVPSRFSGS--GAGTDFTLTIT-SLQPEDFATYY--       | 87  |
| AAB37391 | 26 | SQS-VSS-----N-LAWYQKPGQAPRLLIYGAST----RATGIPARFSGS--GSGTEFTLTIS-SLQSEDFAVYY--    | 87  |
| AAD19463 | 22 | SRS-VNI-----N-VAWYQKPGQAPRLLIFGAST--RATGIPARFSGS--GSGTEFTLTIS-SLQSEDFAVYY--      | 83  |
| CAA85586 | 26 | SQS-ISS-----Y-LNWYQKPGKAPKLLIYAASS--LQSGVPSRFSGS--GSGTDFTLTIS-SLQPEDFATYY--      | 87  |
| ABA26068 | 26 | SQS-VSS-----N-LAWYQKPGQAPRLLIYGAST----RATGIPARFSGS--GSGTEFTLTIS-SLQSEDFAVYY--    | 87  |
| ABA71363 | 26 | SQT-IFS-----Y-LHWYQNPQKAPRLLIYVSS--LRSGVPSRFSGS--GSGTDFTLTIS-SLQPEDFATYY--       | 87  |
| ADU32611 | 26 | SQS-VSS-----N-LAWYQKPGQAPRLLIYGAST----RATGIPARFSGS--GSGTEFTLTIS-SLQSEDFAVYY--    | 87  |
| ABU90703 | 26 | NSN-IGT-----G-YDLHWYQQLPGTAPKLLIYGNTN--RPSGVPDRFSGS--KSGTSAYLAI--GLQAEDEADYYCQ   | 91  |
| 3MLX_L   | 25 | SSN-IG-----N-NMVSWYQHPGTAPKLLIYENSK--RPSGIPDRFSGS--RSGTSATLGI--GLQTGDEAEYYCA     | 89  |
| CAC28926 | 26 | SQS-ISS-----Y-LNWYQKPGKAPKLLIYAASS--LQSGVPSRFSGS--GSGTDFTLTIS-SLQPEDFATYY--      | 87  |
| AAH28090 | 45 | --N-IG-----S-KSVHWYQKPGQAPVLVYDSD--RPSGIPERFSGS--NSGNTATLTIS-RVDAGDEADYYCQ       | 107 |



|          |    |                                                                                   |     |
|----------|----|-----------------------------------------------------------------------------------|-----|
| 1615309A | 26 | SSN-IG-----R-NYVNWYQQLPGTAPKLLIYKNSQ---- <td>90</td>                              | 90  |
| AAZ09098 | 26 | SQS-INN-----YLAWYQKQKPGQAPRLLIYDASN----RATGIPTRFSGS--GSGTDFTLTIN-SLEPEDFAVYY--    | 87  |
| AAD00856 | 26 | SQS-LVY-SDG-N-TYLNWFQQRPGQSPRLLIYKNSQ----RDSGVDRFSGS--GSGTDFTLKIS-RVEAEDVGVYYCM   | 94  |
| BAC01807 | 48 | AL---PK-----Q-Y-AYWYQKQKPGQAPVLIYKDESE----RPSGIPERFSGS--SGTTFVTLTIS-GVQAEDEADYYCQ | 110 |
| ABA71377 | 26 | SQS-VSS-----RYLAWYQKQKPGQAPRLLIYFASG----RATGIPDRFSGS--GSGTDFTLTIS-RLEPEDFAVYY--   | 88  |
| AAW69127 | 26 | SQS-VSS-----N-LAWYQKQKPGQSPRLLIYGAST----RATGIPARFSGS--GSGTEFTLTIS-SLQSEDFAAVYY--  | 87  |
| CAA85588 | 26 | SQS-ISS-----Y-LNWXQKQKPGKAPKLLIYAASS----LQSGVPSRFSGS--GSGTDFTLTIS-SLQPEDFATYY--   | 87  |
| AAB25319 | 50 | SQS-VDN-----YYLWYQKQKPGQAPRLLIYFASG----RATGIPDRFSGS--GSGTDFTLTIS-RLEPEDFAIYY--    | 112 |
| ABC67125 | 28 | SQS-VNN-----NYLAWYQKQKPGQAPRLLIYLASY----RATGIPYRFSGS--GSGTDFTLTIS-RLEPEDFAVYY--   | 90  |
| AAT84398 | 18 | SQS-ISS-----TYLAWYQKQKPGQAPRLLIYFASG----RATGIPDRFSGS--GSGTDFTLTIS-RLEPEDFAVYY--   | 80  |
| ACF34423 | 26 | SSN-IG-----I-NNVNWYQHLPGTAPKLLIYTNNE----RPSGVDRFSGS--KSGTSASLAIIS-GLQSEDEADYYCS   | 90  |
| 3MLY_L   | 26 | SSN-IG-----N-NMVSQYQHPGTAPKLLIYENSK----RPSGIPDRFSGS--RSGTSATLGIIS-GLQTDGAEADYYCA  | 90  |
| P01624   | 26 | SQS-ISN-----SYLAWYQKQKPGQSPRLLIYGAST----RATGIPARFSGS--GSGTEFTLTIS-SLQSEDFAVYY--   | 88  |
| BAC01805 | 48 | NI---GS-----K-S-VHWYQKQKPGQAPVLIYDSD----RPSGIPERFSGSN--SGNTATLTIS-RVEAGDEADYYCQ   | 110 |
| BAC01847 | 48 | SSN-IGA-----G-YDVHWYQQLPGTAPKLLIYGNNS----RPSGVDRFSGSK--SGTSASLAIIS-GFQAEDEADYYCQ  | 113 |
| CAA51140 | 36 | SQS-VSS-----N-LAWYQKQKPGQAPRLLIYGAST----RATGIPARFSGS--GSGTEFTLTIS-SLQSEDFAVYY--   | 97  |
| AAT86034 | 26 | SQS-ISS-----Y-LNWXQKQKPGKAPKLLIYAASS----LQSGVPSRFSGS--GSGTDFTLTIS-SLQPEDFATYY--   | 87  |
| CCD30934 | 26 | SQG-----LNFWVWYQKGGQAPRLLIYHPTD----RAPGVDRFSAR--GSGTEFSLVIS-SVEPDDFALYYCQ         | 88  |
| S40362   | 36 | SQS-VSS-----N-LAWYQKQKPGQAPRLLIYGAST----RATGIPARFSGS--GSGTEFTLTIS-SLQSEDFAVYY--   | 97  |
| ABC66950 | 28 | SQS-ISS-----Y-LNWXQKQKPGKAPKLLIYVASN----LHSGVPSRFSGS--GSGTDFSLTIN-ILQPEDFATYY--   | 89  |
| AAB53322 | 26 | SQS-VSS-----N-LAWYQKQKPGQAPRLLIYGAST----RATGIPARFSGS--GSGTEFTLTIS-SLQSEDFAVYY--   | 87  |
| S40343   | 46 | SQS-VSS-----N-LAWYQKQKPGQAPTVLIYGAST----RATGIPARFSGS--GSGTEFTLTIS-SLQSEDFAVYY--   | 107 |
| ABZ81098 | 26 | SQS-VSS-----N-LAWYQKQKPGQAPRLLIYGAST----RATGIPARFSGS--GSGTEFTLTIS-SLQSEDFAVYY--   | 87  |
| 3LMJ_L   | 26 | SSN-IG-----K-NYVSWYQQLPGAAPKLLIFDDTQ----RPSGIPDRFSGS--KSGTSATLAIIS-GLQTDGAEADYYCG | 90  |
| AAW69248 | 26 | SQS-VSS-----N-LAWYQKQKPGQAPRLLIYGAST----RATGIPARFXGS--GSGTEFTLTIS-SLQSEDFAVYY--   | 87  |
| S25756   | 45 | --N-IG-----S-KSVHWYQKQKPGQAPVLIYVYDSD----RPSGIPERFSGS--NSGNTATLTIS-RVEAGDEADYYCQ  | 107 |
| 1NL0_L   | 26 | TSN-IG-----N-NYVSWYQHPGKAPKLLIYDVSK----RPSGVDRFSGS--KSGNSASLDIIS-GLQSEDEADYYCA    | 90  |
| AAC41988 | 26 | SQS-VGS-----SLAWYQKQKPGQAPRLLIYVYDTSN----RATGIPARFSGS--GSGTDFTLTIS-SLEPEDFADYY--  | 87  |
| AAD48834 | 26 | SQN-VGN-----N-LAWYQKQKPGQAPRLLIYDAST----RATGVPARFSGS--GSGTEFTLTIS-SLQSEDFTVYY--   | 87  |
| 1102971A | 26 | SQS-VSS-----SYLAWYQKQKPGQAPRLLIYFASG----RATGIPDRFSGS--GSGTDFTLTIS-RLEPEDFAVYY--   | 88  |
| ABU90694 | 26 | RSN-IG-----S-NIVNWHQFPGTAPKLLIYSDQ----RPSGVDRFSGS--KSGTSASLAIIS-GLQSEDEADYYCA     | 90  |
| ACF34413 | 26 | --N-IE-----N-TGVHWYQKQKPGQAPVLIYVYDSD----RPSGTPERFSGS--NSGNTATLMIS-RVEAGDEADYYCQ  | 88  |
| 1102971B | 26 | SQS-VRS-----SYLAWYQKQKPGQAPRLLIYFASG----RATGIPDRFSGS--GSGTDFTLTIS-RLEPEDFAVYY--   | 88  |
| ACR16228 | 28 | SQS-V-S-----SYLAWYQKQKPGQAPRLLIYDASN----RATGIPARFSGS--GSGTDFTLTIS-SLEPEDFAVYYCQ   | 91  |
| AAW67418 | 28 | SQS-VSS-----N-LAWYQKQKPGQAPRLLIYGAST----RATGIPARFSGS--GSGTEFTLTIS-SLQSEDFAVYY--   | 89  |
| ADU32644 | 26 | SQS-VSS-----N-LAWYQKQKPGQAPRLLIYAASS----RATGIPARFSGS--GSGTEFTLTIS-SLQPEDFAVYY--   | 87  |
| ABC66880 | 28 | SQS-VSS-----SYLAWYQKQKPGQAPRLLIYFASG----RATGIPDRFSGS--GSGTDFTLTIS-RLEPEDFAVYY--   | 90  |
| ABA71362 | 26 | SQS-ITM-----N-LNWXQKQKPGKAPKLLIYAASS----LQSGVPSKFSGS--GSGTDFTLTIS-SLQAEFATYF--    | 87  |
| AAH73794 | 45 | --N-IG-----T-KSVHWYQKQKSGQAPVLIYVYDSD----RPSGIPERFSGS--NSGNTATLTIS-RVEAGDDADYFCQ  | 107 |
| AAC16894 | 26 | SQS-FTS-----K-LGWYQKQKPGQAPRLLIYGAST----RATGIPARFSGS--GSGTEFTLTIS-SLQSEDFAVYY--   | 87  |
| S29258   | 26 | SSN-IGA-----R-YDVNWYQQLPGTAPKLLIYGNTI----RPSGVDRFSGS--KSGTSASLAIIS-GLQAEDEADYYCQ  | 91  |
| ABC66849 | 28 | SQS-VSS-----SYLAWYQKQKPGQAPRLLIYFASG----RATGIPDRFSGS--GSGTDFTLTIS-RLEPEDFAVYY--   | 90  |
| CAA11830 | 46 | SQS-FSS-----SYLAWYQKQKPGQAPRLLIYGAST----RATGIPDRFSGS--GSGTDFTLTIS-RLEPEDFAVYY--   | 108 |
| CAA67399 | 26 | SQS-VGN-----YLAWYQKQKPGQAPRLLIYASN----RATGIPARFSGS--GSGTDFTLTIS-SLEPEDFAVYY--     | 87  |
| AAB49706 | 26 | SQS-VSS-----N-LAWYQKQKPGQAPRLLIYGAST----RATGIPARFTGS--GSGTEFTLTIS-SLQSEDFAVYY--   | 87  |
| ACZ97421 | 45 | SSN-IG-----K-NYVSWYQQLPGAAPKLLIFDDTQ----RPSGIPDRFSGS--KSGTSATLAIIS-GLQTDGAEADYYCG | 109 |
| AAB03781 | 24 | SQR-IST-----SFLAWYQKQKPGQSPRLLIYDAST----RAPGIPDRFSAS--WSGTDFTLTIS-RLEPEDFAVYY--   | 86  |

|          |    |                                                                                  |     |
|----------|----|----------------------------------------------------------------------------------|-----|
| AAC97103 | 26 | SQD-ISN-----Y-LNWXQKPKGKAPKLLIDGASN----LETGVPSRFSGS--GSGTDFTTTIS-SLQPEDIATYY--   | 87  |
| ABC67083 | 28 | SQS-ISS-----Y-LNWXQKPKGKAPKLLIYVASN----LHSGVPSRFSGS--GSGTDFSLTIN-ILQPEDFATYY--   | 89  |
| AA16589  | 28 | SQS-VSS-----SYLAWYQKPGQAPRLLIYGASS----RATGVPDFRFSGS--GSGTDFTLTIS-RLEPEDFAVYY--   | 90  |
| AAA86778 | 38 | SQG-IRN-----D-LGWYQKPKGKAPKLLIYDAK----LQSGVPSRFSGS--RSGTEFTLTIS-SLQPEDFATYY--    | 99  |
| S21066   | 26 | SSN-IGA----R-YDVNWXQQLPGTAPKLLIYGNTI----RPSGVPDFRFSGS--KSGTSASLAI-GLQAEDEGDYYCQ  | 91  |
| S34005   | 26 | SQS-VSS-----N-LAWYQKPGQAPRLLIYGAST----RATGIPARFSGS--GSGTEFTLTIS-SLQSEDFAVYY--    | 87  |
| AAK62672 | 23 | SQS-VGR-----NLGWYQKPGQAPRLLIYDASN----RATGIPARFSGS--GSGTDFTLTIS-SLEPEDFAVYY--     | 84  |
| AAK71572 | 30 | SQS-VSS-----SYLAWYQKPGQAPRLLIYDAST----RATGIPARFSGR--GSGREFTLTIS-SLQSEDFAVYY--    | 92  |
| CAA34118 | 46 | SQS-VSS-----YLAWYQQRPGQAPRLLIYDASN----RATGIPARFSGS--GSGTDFTLTIS-SLEPEDFAVYY--    | 107 |
| AAF03880 | 26 | SQS-LLR-RDG-H-NDLEWYLQKPGQSPQLIYLGST----RASGVPDFRFSGS--GSGTDFTLKII-RVEAEDAGTYICM | 94  |
| ABC66951 | 28 | SQD-ISS-----W-LAWYQKPKGKAPKLLIYAAS-----LQSGVPSRFSGS--GSGTDFTLTIS-SLQPEDFATYY--   | 89  |
| ABA71385 | 26 | SQD-INS-----W-LAWYQQRPGKVPKLLIYAASS----LQSGVPSRFSGS--GSGTDFTLTIS-SLQPEDFATYY--   | 87  |
| AAT96437 | 26 | SQS-VSS-----K-LAWYQKPGQAPRLLIFGAST----RATGIPARFSGS--GSGTEFTLTIS-SLQSEDFAVYY--    | 87  |
| AAB50823 | 46 | SQS-VST-----N-LAWYQKPGQAPRLLIYGASI----RATGISARFSGS--GSGTEFTLNIT-SLQSGDLALYF--    | 107 |
| AAC41984 | 26 | SQS-VGS-----SLAWYQKPGQAPRLLIYDTSN----RATGIPARFNGS--GSGTDFTLTIS-SLEPEDFADYY--     | 87  |
| AAL65707 | 24 | SQS-ISS-----YLAWYQQRPGQAPRLLIYDASN----RATGIPARFSGS--GSGTDFTLTIS-SLEPEDFAVYY--    | 85  |
| AAC41993 | 26 | SQS-VNS-----RLVWYQKPGQAPRLLIYDASN----RATGIPARFSGS--GSGTDFTLTIS-SLEPEDFAVYY--     | 87  |
| AAH72392 | 45 | SSN-IG-----N-SYVSWYQFPGAAPQLLIYDNDK----RPSGIPDRFSGS--KSGTSATLAI-GLQTEDEAEYYCG    | 109 |
| CAA85587 | 26 | SQS-ISS-----Y-LNWXQKPKGKAPKLLIYAASS----LQSGVPSRFSGS--GSGTDFTLTIS-SLQPEDFATYY--   | 87  |
| AAD14417 | 26 | SQS-VSS-----N-LAWYQKPGQAPRLLIYGAST----RATGIPARFSGS--GSGTEFTLTIS-SLQSEDFAVYY--    | 87  |
| S05270   | 45 | SSN-IG-----N-NYVSWYQQLPGTAPKLLIYDNNK----RPSGIPDRFSGS--KSGTSATLGIT-GLQTGEADYYCG   | 109 |
| ABA26082 | 26 | SQS-VSS-----YLAWYQKPGQAPRLLIYDASN----RATGIPARFSGS--GSGTDFTLTIS-SLEPEDFAVYY--     | 87  |
| 3SM5_L   | 26 | --D-IG-----R-KSVHWYQKPGQAPVLVVCYDSD----RPSGIPERFSGS--NSGNTATLTIS-RVEAGDEADYYCQ   | 88  |
| ABC67023 | 28 | SQS-ISS-----Y-LNWXQKPKGKAPKLLIYAASS----LQSGVPSRFSGS--GSGTDFTLTIS-SLQPEDFATYY--   | 89  |
| S25746   | 45 | SSN-IGA----G-HHVHWYQVPGTAPKLLIYADNN----RPSGVPDFRISGS--KSGTSASLAI-GLRAEDEADYYCQ   | 110 |
| 1206991E | 26 | SQS-VSS-----SYLAWYQQRPGQAPRLLIYGASS----RATGIPDRFSGS--GSGTDFTLTIS-RLEPEDFAVYY--   | 88  |
| AAD44145 | 26 | SQD-ISN-----Y-LNWXQKPKGKAPKLLIDGASN----LETGVPSRFSGS--GSGTDFTTTIS-SLQPEDIATYY--   | 87  |
| AAR88372 | 21 | SQS-VSS-----D-LAWYQKPGQAPRLLIYGAST----RATAIPARYSGG--GSGTAFTLTIS-SLQSEDFAVYY--    | 82  |
| AAK94844 | 26 | SQS-VSS-----YLAWYQQRPGQVPRLLIYDAST----RATGIPARFSGS--GSGTDFTLTIS-SLEPEDFAVYY--    | 87  |
| ACR16233 | 28 | SQS-V-N-----SYLAWYQKPGQAPRLLIYDASN----RATGIPARFSGS--GSGTDFTLTIS-SLEPEDFAVYYCQ    | 91  |
| AEL30602 | 26 | SQS-VSS-----N-LAWYQMPGQAPRLLIYGAST----RATGIPARLSGS--ASGTEFTLTIS-SLQSEDFAVYY--    | 87  |
| 2JB5_L   | 26 | SSD-VGS-----N-NYVSWYQHPGKAPKLLIYGGSN----RPSGVSNRFSGS--KSGNTASLTIS-GLQAEDEADYYCR  | 91  |
| 1ADQ_L   | 25 | --N-IG-----S-KSVHWYQKPGQAPVLVYDSDSD----RPPGIPERFSGS--NSGNTATLTIS-RVEAGDEADYYCQ   | 87  |
| BAC01858 | 48 | NI---GS-----K-N-VHWYQKPGQAPVLVIYRDSN----RPSGIPERFSGSN--SGNTATLTIS-RAQAGDEADYYCQ  | 110 |
| AAD19427 | 21 | SQS-VST-----YLAWYQKPGQAPRLLIYDASN----RATGIPARFSGS--GSGTDFTLTIS-SLEPEDFAVYY--     | 82  |
| 1102971C | 26 | SQS-VSS-----SYLAWYQKPGQAPRLLIYGASS----RATGIPDRFSGS--GSGTDFTLTIS-RLEPEDFAVYY--    | 88  |
| AAZ32306 | 28 | SQS-VSS-----SYLAWYQKPGQAPRLLIYGASS----RATGIPDRFSGS--GSGTDFTLTIS-RLEPEDFAVYY--    | 90  |
| AAW69074 | 26 | SQS-VSS-----N-LAWYQKPGQAPRLLIYGAST----RATGIPARFSGS--GSGTEFTLTIS-SLQSEDFAVYY--    | 87  |
| 1ZVO_A   | 26 | SSN-IG-----R-YYVWYQQLPGTTPKLLIYKDNQ----RPSGVPDFRFSGS--KSGTSASLAI-GLRSEDEADYYCA   | 90  |
| 2XQB_L   | 22 | TSN-LK-----R-NYVWYQQLPGTAPKLLIYRDRR----RPSGVPDFRFSGS--KSGTSASLAI-GLRSEDEADYYCA   | 86  |
| CAJ57183 | 26 | SQS-VSS-----N-LAWYQKPGQAPRLLIYGAST----RATGIPARFSGS--GSGTEFTLTIS-SLQSEDFAVYY--    | 87  |
| 1Q1J_L   | 26 | SSN-IG-----N-NYVLWYQFPGTAPKLLIYGNK----RPSGIPDRFSGS--KSGTSATLGIT-GLQTGEADYFCA     | 90  |
| BAC01774 | 48 | SSD-IGA----G-SDVHWYQQLPGTAPKVVYIGDNT----RPSRVPDRFSGSK--SGTSATLAI-GLQGEDEADYYCQ   | 113 |
| ABU90688 | 26 | --N-IG-----S-ESVHWYQHKGQAPVLVIYDDTD----RPSGIPERFVGS--NSGNTATLTIN-RVEDGEADYYCQ    | 88  |
| 1206991B | 26 | SQS-VSS-----SYLAWYQKPGQAPRLLIYGASS----RATGIPDRFSGS--GSGTDFTLTIS-RLEPEDFAVYY--    | 88  |
| AAC41992 | 26 | SQS-VSS-----YLAWYQKPGQAPRLLIYDASN----RATGIPARFSGS--GSGTDFTLTIS-SLEPEDFAVYY--     | 87  |
| S40379   | 46 | SQS-VSS-----YLAWYQKPGQPRLLIYVASN----RATGIPARFSGS--GAGTDFTLTIS-SLEPEDFAVYY--      | 107 |

|          |    |                                                                                  |     |
|----------|----|----------------------------------------------------------------------------------|-----|
| AA16639  | 28 | SQS-ISS-----W-LAWYQKPGKAPKLLIYKASR----LESGVPSRFSGS--GSGTDFTLTIS-SLQPDDFATYY--    | 89  |
| ABE03813 | 26 | SQG-IRS-----W-LAWYQQRPGRAPKLLIYAASS----LQSGVPSRFSGS--GSGTDFTLTIT-SLQPEDFVTTY--   | 87  |
| ABC67131 | 28 | SQS-ISS-----Y-LNWXQKPGKAPKLLIYVASN----LHSGVPSRFSGS--GSGTDFSLTIN-ILQPEDFATYY--    | 89  |
| AAD56267 | 26 | SQS-VSS-----N-LAWYQKPGQAPRLLIYCAST----RATGIPARFSGS--GSGTEFTLTIS-SLQFEDFAVYY--    | 87  |
| 3C2A_L   | 26 | SSN-IG-----N-NYVLWYQFPGTAPKLLIYGNK----RPSGIPDRFSGS--KSGTSATLGIT-GLQTGDEADYFCA    | 90  |
| A56701   | 46 | SQS-VSS-----YLAWYQKPGQAPRLLIYDASN----RATGIPARFSGS--GSGTDFTLTIS-SLEPEDFAVYY--     | 107 |
| CCD30932 | 26 | SQG-----LNFWVWYQKRGQAPRLLIHAPSG----RAPGVDRFSAR--GSGTEFSLVIS-SVEPDDFAIYYCQ        | 88  |
| AAU14891 | 26 | SQS-VSS-----N-LAWYQKPGQAPRLLIYGAST----RATGIPARFSGS--GSGTEFTLTIN-SLQSEDFAVYY--    | 87  |
| AAW69100 | 29 | SQS-VGS-----D-LVWYQQRPGQAPRLLIYRASL----RATGIPARFSGS--GSGTEFTLTIS-SLQSEDFAVYY--   | 90  |
| ABC67132 | 28 | SQS-ISS-----Y-LNWXQKPGKAPKLLIYVASN----LHSGVPSRFSGS--GSGTDFSLTIN-ILQPEDFATYY--    | 89  |
| AAC41991 | 26 | SQS-VSS-----YLAWYQKPGQAPRLLIYDASN----RATGIPARFSGS--GSGTDFTLTIS-SLEPEDFAVYY--     | 87  |
| ABC66850 | 28 | SQS-VSS-----SYLAWYQKPGQAPRLLIYGASS----RATGIPDRFSGS--GSGTDFTLTIS-RLEPEDFAVYY--    | 90  |
| ABA70850 | 26 | SQS-VNN-----HLVWFQKPGQVPRLLIYAASH----RATGIPARFSGS--GSGTDFTLTIS-SLEPEDFAVYY--     | 87  |
| S25757   | 44 | TSN-IG-----S-NTVNWYQQLPGTAPKVLIIYNNNE----RPSGVDRFSGS--KSGTSASLAIS-GLQSDDEADYICA  | 108 |
| AAK94835 | 26 | SQS-VSS-----YLAWYQKPGQAPRLLIYDASN----RATGIPARFSGS--GSGTDFTLTIS-SLEPEDFAVYY--     | 87  |
| AAW69069 | 26 | SQS-VGS-----D-LVWYQQRPGQAPRLLIYRASL----RATGIPARFSGS--GSGTEFTLTIS-SLQSEDFAVYY--   | 87  |
| ABG38342 | 28 | SQS-VSS-----YLAWYQKPGQAPRLLIYDASN----RATGIPARFSGS--GSGTDFTLTIS-SLEPEDFAVYY--     | 89  |
| BAC01796 | 48 | KL---GD-----K-Y-ACWYQKPGQSPVLVIYQDSK----RPSGIPERFSGSN--SGNTATLTIS-GTQAMDEADYICQ  | 110 |
| 4DAG_L   | 26 | --K-LG-----D-KYASWYQKPGQSPVLVIYQDSE----RPSGIPERFSGS--NSGNTATLTIS-GTQAMDEADYICQ   | 88  |
| ABU90722 | 26 | SGS-IAS-----NYVQWYQQRPGSAPSTLIFEDKQ----RPSGVDRFSGSIDTSSNSASLTIS-GLKTEDEADYICQ    | 92  |
| AAC64144 | 26 | SQS-VSS-----N-LAWYQKPGQAPRLLIYGAST----RATGIPARFSGS--GSGTEFTLTIS-SLQSEDFAVYY--    | 87  |
| ABC66942 | 26 | SQS-VSS-----YLAWYQKPGQAPRLLIYDASN----RATGIPARFSGS--GSGTDFTLTIS-SLEPEDFAVYY--     | 87  |
| 3G6D_L   | 26 | --N-IG-----G-TFVSWYQKPGQAPVLVIYDDND----RPSGIPERFSGS--NSGNTATLTIS-GTQAEDEADYICG   | 88  |
| G44151   | 25 | SQS-VSS-----YLAWYQKPGQAPRLLIYDASN----RATGIPARFSGS--GSGTDFTLTIS-SLEPEDFAVYY--     | 86  |
| AAA03468 | 26 | SQS-VST-----N-LAWYQKPGQAPRLLIYGAST----RATGIPARFSGS--GSGTEFTLTIR-SMQSEDFAVYY--    | 87  |
| AAR84230 | 26 | SQR-VSL-GSN-NKNYLAWYQHQPQPRLIYWAST----RESGVDRFSGS--GSGTDFTLTIN-SLQAEDVAVYYCQ     | 95  |
| ABA70836 | 26 | SQG-ISS-----W-LAWYQKPGKAPKLLIYAASN----LQSGVPSRFSGS--RSGTDFTLTIS-SLQPEDFATYY--    | 87  |
| AAB41520 | 26 | SQS-VSS-----N-LAWYQKPGQAPRLLIYGAST----RATGIPARFSGS--GSGTEFTLTIS-SMQSEDFAVYY--    | 87  |
| CAB99323 | 46 | SQS-VAS-----AYLAWYQKPGQAPRLLIYGASS----RATDIPHRFSGS--GSGTDFTLTIS-RLEPEDFAVYY--    | 108 |
| AE016796 | 45 | SSN-IGA-----G-YGVHWYQQLPGAAPKLLVYGNNSN----RPSGVDRFSGS--KSGTSASLAIT-GLQAEDEADYICQ | 110 |
| ABU90610 | 26 | SGS-IGS-----NYVQWYQQRPRSPSTVIYEDIE----RPSGVDRFSGSIDQSSNSASLTIS-GLKAEDEADYICQ     | 92  |
| AEM89218 | 45 | --N-IG-----T-KVLHWYQQTTPGQAPVLVYDDSD----RPSGIPERFSGS--NSGNTATLTIS-RVEVGDEADYICQ  | 107 |
| ABC66862 | 28 | SQS-ISS-----Y-LNWXQKPGKAPKLLIYAASS----LQSGVPSRFSGS--GSGTDFTLTIS-SLQPEDFATYY--    | 89  |
| 1W72_L   | 26 | --N-IG-----S-RSVHWYQKPGQAPVLVYDDSD----RPSGIPERFSGS--NSGNMATLTIS-RVEAGDEADYICQ    | 88  |
| ACF34411 | 26 | SSN-IG-----G-NVVNWXQQLPGMAPKVLIIHSQNG----RAPGVDRFSGS--KSDTSASLAIS-GLQSEDEADYICA  | 90  |
| AAD19434 | 21 | SQS-ISS-----HLAWYQHKGQAPRLLIYETSND----RVTGIPARFSGS--GSGTDFTLTIS-SLEPEDFAVYY--    | 82  |
| 0903206A | 26 | SSN-IG-----D-NFVSWYQQLPGTAPKLLIYDNNK----RPSGIPDRFSGS--KSGTSATLGIT-GLQTGDEADYICG  | 90  |
| 7FAB_L   | 26 | SSN-IGA-----G-HNVKWXQQLPGTAPKLLIYHNN-----ARFSVS--KSGTSATLAIIT-GLQAEDEADYICQ      | 84  |
| 1206991C | 26 | SQS-VSS-----SYLAWYQKPGQAPRLLIYGASS----RATGIPDRFSGS--GSGTDFTLTIS-RLEPEDFAVYY--    | 88  |
| AAA20162 | 26 | SQS-VSS-----YLAWYQEKPGTAPRLLIYDASN----RATGIPARFSGS--GSGTDFTLTIS-SLEPEDFAVYY--    | 87  |
| AA16590  | 28 | SQS-VSN-----NYLAWYQKPGQAPRLLIYAASS----RATGIPDRFSGS--GSGTDFTLTIS-RLEPEDFAVYY--    | 90  |
| AAB24270 | 26 | SSN-IGA-----G-HNVKWXQQLPGTAPKLLIYHNN-----ARFSVS--KSGTSATLAIIT-GLQAEDEADYICQ      | 84  |
| AAD16618 | 20 | SQS-VSS-----YLAWYQKPGQAPRLLIYDASY----RATGIPARFSGS--GSGTDFTLTIS-SLEPEDFAVYY--     | 81  |
| ADX66128 | 15 | SQS-ISN-----N-LAWYQKPGQAPRLLIYDAST----RATGIPARFAGS--GSGTEFTLTIS-SLQSEDFALYY--    | 76  |
| CAC06693 | 26 | SQS-VSS-----TYLAWYQKPGQAPRLLIYDASN----RATGIPARFSGS--GSGTDFTLTIS-SLEPEDFAVYY--    | 88  |
| AAD19497 | 22 | SQS-VGS-----K-LAWYQKPGQAPRLLIYGAST----RASGVPARFSGS--GSGTEFTLTIS-SLQSEDFAVYY--    | 83  |
| AAD48829 | 26 | SQN-IGN-----S-LAWYQLKPGQAPRVMYDPST----RATGIPARFSGS--GSGTEFTLTIN-SLQSEDFAVYY--    | 87  |

ACF34422 26 --T-LR-----S--YYANWYQOKTGPVPLVIYYANN----RPSGIPDRFSGS--TSGNTASLTIT-GAQAEDADYYCN 88  
 B49444 26 SSN-IGA-----G-HNVKWYQQLPGTAPKLLIFHNN-----ARFSVS--KSGTSATLAIIT-GLQAEDADYYCQ 84  
 1206991A 26 SQS-VSS-----SYLAWYQOKPGQAPRLLIYGASS----RATGIPDRFSGS--GSGTDFTLTIS-RLEPEDFAVYY-- 88  
 ABC66967 28 SQS-VSS-----YLAWYQOKPGQAPRLLIYDASN----RATGIPARFSGS--GSGTDFTLTIS-SLEPEDFAVYY-- 89  
 3GBM\_L 26 SSN-IG-----N-DYVSWYQQLPGTAPKLLIYDNNK----RPSGIPDRFSGS--KSGTSATLGIT-GLQTGDEANYCA 90  
 AAA20158 26 SQS-VSS-----N-LAWYQOKPGQAPRLLIYGAST----RATGIPARFSGS--GSGTEFTLTIS-SLQSEDFAVYY-- 87  
 AEN14418 26 SQS-VKN-----N-LAWYQKRPQAPRLLIFDTSS----RASGIPARFSGG--GSGTEFTLTVN-SMQSEDFATYY-- 87  
 S25751 45 --K-LG-----D-KYASWYQOKAGQSPVLIYRHSK----RPSGIPERFSGS--NSGNTATLTIS-GTQVMDEADYYCQ 107  
 3NH7\_L 26 --S-LG-----S-KYVIWYQOKPGQAPVLIYDDSN----RPSGIPERFSGS--NSGNTATLTIS-GTQAEDADYYCS 88  
 ABU90591 26 SGK-IAT-----NYVQWFQORPGSSPTTVIFEDKI----RPSGVDRFSGS IDTSSNSASLTIS-GLETEDEADYYCQ 92  
 AEK69362 26 SQS-VSS-----YLAWYQONPGQAPRLLIYDASN----RATGIPARFSGS--GSGTDFTLTIS-SLEPEDFAVYY-- 87  
 AAY16633 26 SQS-VSS-----SYLAWYQOKPGQAPRLLIYGASS----RATGIPDRFSGS--GSGTDFTLTIS-RLEPEDFAVYY-- 88  
 0610195A 26 SSN-IGR-----NTVNWYQOVPGAAPKLLVYSNNO----WPSGVDRFSGS--KSGTSASLAIIS-GLHSEDEADYFCA 90  
 AAW69171 26 SQS-VTS-----N-LAWYQOKPGQAPRLLIYVAST----RATGIPDRFSGS--GSGTEFTLTIS-SLQSEDFAVYY-- 87  
 AAF79137 26 SQS-VNN-----N-LAWYQONPGQAPRLLIYGAST----RATGIPARFSGS--GSGTEFTLTIS-SLQSEDFAIYY-- 87  
 CAJ13455 26 SQS-IGS-----S-LHWYQOKPDQSPKLLIKYASQ----SFGVPSRFSGS--GSGRDFTLTIN-SLEAEDAATYY-- 87  
 1RZF\_L 26 SSN-IG-----N-NDVSWYQFPPTVTKLVIYENNE----RPSGIPDRFSGS--KSGTSATLGIT-GLQTGDEADYYCG 90  
 AAY16598 28 SQS-VSS-----SYLAWYQOKPGQAPRLLIYGASS----RATGIPDRFSGS--GSGTDFTLTIS-RLEPEDFAVYY-- 90  
 3G04\_A 26 SSN-IG-----N-NAVNWYQQLPGKAPKLLIYDDQ----LPSGVSDRFSGS--RSGTSASLAIR-GLQSEDEADYYCT 90  
 AAF13225 26 ISN-IG-----I-NSVYWYQQLPGTAPKLLFYRNNQ----RPSGVDRFSGS--KSGTSASLAIIS-GLRSEDEADYYCA 90  
 CAA85594 26 SQS-VSR-----SQLAWYQOSPGQAPRLLIYDASS----RATGIPDRFSGS--GSGTDFTLTIS-RLEPEDFAVYY-- 88  
 AAB03782 24 SQG-VSS-----GSLAWYQOKAGQAPRLLIYGASR----RATGIPDRFTGS--GSGTDFTLTIT-RLEPEDFAVYY-- 86  
 ABY48867 26 SSN-IG-----S-YTVNWXQQLPGTAPKLLIYSLNQ----RPSGVDRFSGS--KSGTSASLAIIS-GLQSEDEAVYYCA 90  
 S40328 45 SQS-VIH-----N-LAWYQOKPGQAPRLLIYGAYT----RATGVPARFSGS--GSGTEFTLTIS-GLQSEDLATYY-- 106  
 ABC66939 28 SQG-ISS-----Y-LAWYQOKPGKAPKLLIYAASST----LQSGVPSRFSGS--GSGTEFTLTIS-SLQPEDFATYY-- 89  
 AAO22175 25 SQX-ISN-----Y-LDWYQOKPGKAPKLLIYDAST----LQSGVPSRFSGS--GSGTDFTLTIS-SLQPEDFATYY-- 86  
 S25738 45 --T-LG-----D-KYACWYQOKPGHSPVLIYFQDSK----RPSGIPERFSGS--NSGNTATLTIS-GTQAMDEADYYCQ 107  
 CAA85584 26 SQS-ISS-----Y-LNWXQOKPGKAPKLLIYAASS----LQSGVPSRFSGS--GSGTDFTLTIS-SLQPEDFATYY-- 87  
 1206991D 26 SQS-VSS-----RYLAWYQOKPGQAPRLLIYGASS----RATGIPDRFTGS--GSGTDFTLTVS-RLEPEDFAVYY-- 88  
 AAW69195 26 SQS-VSS-----N-LAWYQOKPGQAPRLLIYGAST----RATGIPARFSGS--GSGTEFTLTIS-SLQSEDFAVYY-- 87  
 AAH70353 45 --N-VG-----S-KAVHWYQOKPGQAPVLIYDYDTD----RPSGIPERFSGS--NSGNTATLTIS-RVEAGDEADYYCQ 107  
 AAZ09054 26 SQS-VSS-----YLAWYQOKPGQAPRLLIYDASN----RATGIPARFSGS--GSGTDFTLTIS-SLEPEDFAVYY-- 87  
 AAR84233 26 SQR-VSL-GSN-NKNYLAWYQHQPQPRLLIYWAST----RESGVDRFSGS--GSGTDFTLTIN-SLQAEDVAVYYCQ 95  
 AAH32452 45 --A-LP-----K-KYAYWYQOKSGQTPVLIYDDTE----RPSGIPERFSGS--SSGTVATLTIS-GAQVEDEADYYCY 107  
 AAQ55267 24 SQS-VGS-----NLAWYQOKPGQAPRLLIYGVSS----RATGIPARFSGS--GSGTKFTLTIS-SLRSEDFAVYY-- 85  
 AAW69176 26 SQS-VTS-----N-LAWYQOKPGQAPRLLIYVAST----RATGIPDRFSGS--GSGTEFTLTIS-SLQSEDFAVYY-- 87  
 ABC67121 28 SQG-ISS-----W-LAWYQOKPEKAPKSLIYAASS----LQSGVPSRFSGS--GSGTDFTLTIS-SLQPEDFATYY-- 89  
 ABA70776 36 SQS-ISS-----Y-LNWXQOKPGKAPKLLIYAASS----LQSGVPSRFSGS--GSGTDFTLTIS-SLQPEDFATYY-- 97  
 BAC01827 49 DIS-VGS-----Y-R-IYWYQOKPGSPPFLLKYTSDSKQOQSGVPSRFSGSKDVANAGILLIS-GLQSEDEADYYCM 119  
 AAW69108 29 SQS-VGS-----D-LVWYQORPGQAPRLLIYRASL----RATGIPARFSGS--GSGTEFTLTIS-SLQSEDFAVYY-- 90  
 AAV40707 32 SQN-IGN-----Y-LSWYQOKPGRAPKLLIYDAST----LQDGVPARFSGS--GSGTDFTLTIS-SLQPEDFATYY-- 93  
 AAD27544 26 SQS-VSS-----N-LAWYQOKPGQAPRLLIYGAST----RATGIPARFSGS--GSGTEFTLAIIS-SLQSEDFAVYY-- 87  
 AEO16798 45 SSN-IGA-----D-YDVYWYQHLPGTAPKLLMYGDGY----RPSGVDRFSGS--KSGTSASLAIIT-GLQAEDADYYCQ 110  
 AAK94860 26 SQS-VSS-----N-LAWYQOKPGQAPRLLIYDAST----RATGIPAKFSAS--GSGTDFTLTIS-SLQSEDFAVYY-- 87  
 1603260B 26 SQG-IRN-----D-LGWYQOKPGKAPKLLIYAASS----LQSGVPSRFSGS--GSGTEFTLTIS-SLQPEDFATYY-- 87  
 AAW69207 26 SQS-VSS-----YLAWYQOKPGQAPRLLIYDTSN----RATGIPARFSGS--GSGTDFTLTIS-SLEPEDFAVYY-- 87  
 ABC67104 28 SQS-ISS-----W-LAWYQOKPGKAPKLLIYKASS----LESGVPSRFSGS--GSGTEFTLTIS-SLQPDFFATYY-- 89

|          |    |                                                                                  |     |
|----------|----|----------------------------------------------------------------------------------|-----|
| ABU90574 | 26 | --N-IG-----G-KTVHWYQKPGQAPVLVYVYDSD---- <td>88</td>                              | 88  |
| AAA58917 | 46 | SQS-VSS-----YLAWYQKPGQAPRLLIYDASN----KATGVPARFSGS--GSGTDFTLTIS-SLEPEDFAVYY--     | 107 |
| AAM46646 | 48 | SQR-IST-----Y-LNWXQKPGKAPKLLIYAASS----LQSGVPSRFSGS--GSGTDFTLTIT-SLQPDDFATYY--    | 109 |
| ABA70799 | 30 | SQS-IFT-----W-VAWYQKAGQAPRLLIYKAST----LESGVPSRFSGS--GSGTDFILTIS-SLQPDDVATYY--    | 91  |
| AAW69029 | 26 | SQS-VSS-----YLAWYQKPGQAPRLLIYDVST----RAAGIPARFSGS--GSGTDFTLTIS-SLEPEDFAVYY--     | 87  |
| AAC97102 | 26 | SQD-INN-----Y-LNWXQKPGKTPKLLIYGASN----LETGVPSRFSGS--GSGTDFIFTIS-SLQPEDIATYY--    | 87  |
| ABA71378 | 26 | SQS-VDS-----RYLAWYQKPGQAPRLVIHGASS----RATGIPDRFSGS--GSGTEFTLTIS-RLEPEDFAVYY--    | 88  |
| ACF34424 | 26 | SSN-IG-----R-NTVNWYQHLPGTAPKLLIYGNNE----RPSGVDRFSGS--KSGTSASLAIS-GLRSEDEADYFCA   | 90  |
| ABU90600 | 26 | SQG-INN-----N-LAWFQKPGKAPKSLIYAASS----LQGGVPSKFSGS--GSGTDFNLTIS-SLQPEDFATYY--    | 87  |
| ABI74147 | 26 | SQS-VTS-----N-LAWYQKPGQAPRLLIHGAST----RASGVPARFSGS--GSGTEFTLTIS-SLQSEDFAVYY--    | 87  |
| 3UJI_L   | 26 | --I-LG-----D-KYVSWYQKSGQSPLLVIYEDTK----RPSGIPDRFSGS--KSGNTATLTIS-GTQAMDEADYYCQ   | 88  |
| ABG77645 | 26 | SQS-VSS-----N-LAWYQKPGQAPRLLIYGAST----GATGIPARFSGS--GSGTEFTLTIS-SLQSEDFAVYY--    | 87  |
| ABC67129 | 28 | SQS-ISS-----Y-LNWXQKPGKAPKLLIYVASN----LHSGVPSRFSGS--GSGTDFSLTIN-ILQPEDFATYY--    | 89  |
| CAD43024 | 26 | SQS-VSS-----NYLAWYQKPGQAPRLLIYGASS----RATGIPDRFSGS--GSGTDFTLTIS-SLQSEDFAVYY--    | 88  |
| AAW69261 | 26 | SQS-VTA-----K-LAWYQKPGQAPRLLIYGAST----RATGIPARFSGS--GSGTEFTLTIS-SLQSEDFAVYY--    | 87  |
| ADU32604 | 26 | SKS-ISS-----N-LAWYQKPGQAPRLLIYGAST----RATGIPARFSGS--GSGTEFTLTIS-SLQSEDFAVYY--    | 87  |
| S25742   | 42 | SSN-IG-----N-NYVSWYQQLPGRAPKLLIFENNK----RPSAIPDRFSGS--KSGTSATLGIA-GLQTGDEADYYCG  | 106 |
| ABA26134 | 26 | SQS-VSS-----YLAWYQKPGQAPRLLIYDASN----RATGIPARFSGS--GSGTDFTLTIS-SLEPEDFAVYY--     | 87  |
| ABA70845 | 26 | SQR-ISS-----NSLAWYQKPGRAPRLVIYATSS----RATGIPDRISGS--GSGTDFTLTIS-RLEPEDFAVYY--    | 88  |
| AAC64146 | 26 | SQS-VSS-----N-LAWYQKPGQAPRLLIYGAST----RATGIPARFSGS--GSGTEFTLTIS-SLQSEDFAVYY--    | 87  |
| BAD90940 | 24 | SQS-VRN-----YLAWYQKPGQAPRLLIYGASN----RATGIPARFSGS--GSGTDFTLTIS-SLEPEDFAVYY--     | 85  |
| AAA51019 | 48 | SQT-IAT-----F-LNWXQKPGKAPKLLIYGASS----LQSGVPSRFSGS--GSGTDFTLTIS-SLQPEDFATYY--    | 109 |
| AAD16595 | 19 | SQS-VSG-----N-LAWYQKPGQAPRLLIHGAST----RATGIPARFSGS--GSGTEFTLTIS-SLQSEDFAVYY--    | 80  |
| ABC67122 | 28 | TQS-ISK-----Y-LNWXQKPGQAPKVLIIYGAST----LEGGVPSRFNGS--GSGTDFTLIIS-SLQPEDFATYY--   | 89  |
| CAA85585 | 26 | SQS-INS-----Y-LNWXQKPGKAPKLLIYAASS----LESGVPSRFSGS--ESGTFDLTIS-SLQPEDFATYY--     | 87  |
| BAC01776 | 48 | SSN-IGN-----N-Y-VSWYQQLPGTAPKLLIYDNNK----RPSGIPDRFSGSK--SGTSATLGIT-GLQTGDEADYYCG | 112 |
| CAC85285 | 27 | --N-IG-----R-KSVHWYQQRPGQAPLLLVYDDGD----RPSGIPDRFSGS--NSESAATLTIS-MVAPADEADYFCQ  | 89  |
| AAW69214 | 26 | SQS-VSS-----N-LAWYQKPGQAPRLLIYGAST----RATGIPGRFSGS--GSGTEFTLTIS-SLQSEDFAVYY--    | 87  |
| AAW69097 | 29 | SQS-VSS-----YLAWYQRRPGQAPRLLIYDVST----RAAGIPARFSGS--GSGTDFTLTIS-SLEPEDFAVYY--    | 90  |
| BAD27497 | 26 | SQS-VSS-----N-LAWYQKPGQAPRLLIYGAST----RATGIPARFSGS--GSGTEFTLTIS-SLQSEDFAVYY--    | 87  |
| CAD48510 | 26 | SQS-VRS-----N-LVWYQKPGQAPRLLIYDASN----RASGVPPRFSGS--GSGTDFTLTIS-SLQSEDFAVYY--    | 87  |
| CAA85596 | 26 | SQT-INS-----HYLAWYQKPGQAPRLLIYDASS----RATGVDRFSGS--GSGTDFILTIS-GLEPEDFAVYY--     | 88  |
| CAA85598 | 26 | SQS-VSR-----SQLAWYQKSPGQAPRLLIYDASS----RATGIPDRFSGS--GSGTDFTLTIS-RLEPEDFAVYY--   | 88  |
| ABU90732 | 26 | --N-LG-----D-QYACWYQKPGQSPVLIYQDNK----RPSGIPERFSGS--NSGDTATLTIS-GTQSTDEADYFCQ    | 88  |
| AAC41920 | 22 | SQS-VSS-----YLAWYQKPGQAPRLLIYDASN----RATGIPARFSGS--GSGTDFTLTIS-SLEPEDFAVYY--     | 83  |
| AAD29271 | 26 | SQS-VSS-----YLAWYQKPGQAPRLLIYDASN----RATGIPARFSGS--GSGTDFTLTIS-SLEPEDFAVYY--     | 87  |
| S25747   | 45 | --N-IA-----S-KSVHWYQKPGQAPVLVYVYDSD----RPSGIPERFSGS--NSGNTATLNIS-RVEAGDEAAYYCQ   | 107 |
| ABV22589 | 21 | RSN-IR-----S-GFVSWYQVPGTAPKVLINRNDQ----RPSGVDRFSGS--KSGTSATLAIS-GLRSEDEADYYCA    | 85  |
| ACR16246 | 26 | SQS-VSS-----YLAWYQKPGQAPRLLIYDASN----RATGIPARFSGS--GSGTDFTLTIS-SLEPEDFAVYY--     | 87  |
| 3G01_L   | 26 | --A-LS-----N-QYAYWYRQRPGQAPLLIYKDTK----RPSGIPERFSGS--TSGTTVTLTIS-GVQAEDEADYYCQ   | 88  |
| AAO17826 | 45 | --N-IE-----Y-RSVHWYQKSGQAPVAVIYDNSD----RPSGIPERFSGS--KSGNTATLTIS-RVEAGDEADYYCQ   | 107 |
| CAC44147 | 24 | SQS-ITS-----Y-LNWXQKLGKAPKLLIYAASR----LQSGVPSRFSGS--GSGTDFTLTIS-SLQPEDFATYY--    | 85  |
| 2FL5_L   | 26 | --V-LP-----K-KYAYWYQERSGQAPVLVYVYEDSG----RPSEIPERFSGS--SSGKATLTIS-GAQVEDEADYYCY  | 88  |
| S40371   | 23 | SQS-LLY-STG-Y-NYLDWYLQKPGKSPQLLIYLGSK----RASGVDRFSGS--GSGTDFTLKIS-RVEAEDVGVYYCM  | 91  |
| ADU32608 | 26 | SQS-VSH-----YLAWFQKPGQPPRLLIYDVST----RATGIPARFSGS--GSGTDFTLTIS-SLEPEDFAVYY--     | 87  |
| BAC01775 | 48 | SSN-IGN-----N-Y-VSWYQQLPGTAPKLLIYDNNK----RPSGIPDRFSGSK--SGTSATLGIT-GLQTGDEADYYCG | 112 |
| ABC66978 | 28 | SQS-ISS-----W-LAWYQKPGKAPKLLIYKASS----LESGVPSRFSGS--GSGTEFTLTIS-SLQPDDFATYY--    | 89  |

BAC55089 26 --A-LP-----K-KYAYWYQKSGQAPVLVIYEDSK----RPSGIPERFSGS--SSGTMATLTIS-GAQVEDEADYYCY 88  
 AAW69085 26 SHS-VSS-----YLAWYQKPGQAPRLLIYDAST----RATGIPARFSGS--GSGTDFTLTIS-SLEPEDFAVYY-- 87  
 AAH73787 45 --N-IG-----S-KSVHWYRQKPGQAPMLVVYDDSA----RPSGIPERFSGS--ASENTATLTIS-GVEAGDEADYYCQ 107  
 AAR88382 26 SSN-IG-----N-NDVSWYQOPGTVPKLVYENNO----RPSGIPDRFSGS--KSGTSATLTGIT-GLQTGDEADYYCG 90  
 LLIL\_A 25 --K-LG-----D-AYVCWYQOPGQSPVVVIYQDNR----RPSGIPERFSGS--SSGNTATLTIS-GTQTLDEADYYCQ 87  
 ADU32607 26 SQS-VRF-----YLAWYQKPGQAPRLLIYDAST----RATGIPARFSGS--GSGTDFSLTIS-SLETEDFAVYY-- 87  
 ABA70797 30 SQS-ISS-----W-LAWYQKPGKAPKLLIYKASS----LESGVPSRFSGS--GSGTEFTLTIS-SLQPDDFATYY-- 91  
 AAW69280 26 SQS-VSS-----N-LAWYQHKPGQAPRLLIYGAST----RATGIPGRFSGS--GSGTEFTLTIS-SLQSEDFAVYY-- 87  
 AAT96435 26 SQS-VSS-----K-LAWYQKPGQAPRLVYVYGAST----RATGIPARFSGS--GSGTEFTLTIN-SMESEDFAVYY-- 87  
 AAZ09058 26 SQT-VGS-----S-LAWYQKPGQAPRLLIYGAST----RATGIPARFSAS--RSGTEFTLTIS-SLQSEDFAVYY-- 87  
 BAC01826 49 GIN-VGT-----Y-K-IYWYQKPGSPQYLLRYSNSDSRQOASGVPSRFSGSKDASANAGILLIS-GLQSEDEADYYCM 119  
 ABU90584 26 SSD-IGG-----Y-NYVSWYQHPGKAPKLIYEVSN----RPSGVSNRFSGS--KSGNTASLTIS-GLQAEDEADYYCN 91  
 P04207 46 SQS-VSN-----N-LAWYQKPGQAPRLLIYGAST----RATGIPARFSGS--GSGTEFTLTIS-RLQSEDFAVYY-- 107  
 ACF34443 26 --K-LG-----N-EYACWYQKPGQSPVVVIYQDTK----RPSGIPERFSGS--NSGNTATLTIS-GTQTMDEADYYCQ 88  
 ACF34427 26 SSN-IE-----N-NYVSWYQOLPGTAPKLLIYDTNK----RPSGIPDRFSGS--KSGTSATLDIA-GLQTGDEADYYCG 90  
 BAC01596 26 SQS-VSS-----YLAWYQKPGQAPRLLIYDASN----RATGIPARFSGS--GSGTDFTLTIFFSLEPEDFAVYY-- 88  
 ADU57744 26 SQS-VRR-----SLAWYQKPGQAPRLLIYDASN----RATDIPARFSGS--GSGTDFTLTIS-SLEPEDFAVYY-- 87  
 ABA70774 36 SQS-ISS-----Y-LNWYQKPGKAPKLLIYAASS----LQSGVPSRFSGS--GSGTDFTLTIS-SLQPEDFATYY-- 97  
 AAB25742 26 SQS-ISS-----W-LAWYQKPGKAPKLLIYKASS----LESGVPSRFSGS--GSGTEFTLTIS-SLQPDDFATYY-- 87  
 AAG43503 26 SQS-VTS-----SLAWYQKPGQAPRLLIYDASN----RATGIPARFSGS--GSGTDFTLTIS-SLEPEDFAVYY-- 87  
 AAW69249 26 SQS-VSS-----N-LAWYQKPGQAPRLLIYGAST----RATGIPARFSGS--GSGTEFTLTIS-SLQSEDFAVYY-- 87  
 BAC87479 46 SQS-VGT-----T-VAWYQKPGQAPRLLIYGAST----RAADIPARFSGS--GSGTEFTLTIS-SLQSEDFAVYY-- 107  
 ADU57763 26 SQS-VSS-----N-LAWYQKPGQAPRLLIYGAST----RATGIPARFSGS--GSGTEFTLTIS-SLQSEDFAVYY-- 87  
 AAP34743 26 SQT-VSS-----N-LAWYQKPGQAPRLLIYGAST----RATGIPARFSGS--GSGTEFTLTIS-SLQSEDFAVYY-- 87  
 AAD19498 24 SQS-VSG-----N-LAWYQKPGQAPRLLIYDAST----RATGIPARFSGS--GSGTEFTLTIS-SLQSEDFAVYY-- 85  
 AAY16626 26 SQS-VSS-----YLAWYQKPGQAPRLLIYGASS----RATGIPDRFSGS--GSGTDFTLTIS-RLEPEDFAVYY-- 87  
 ABU90561 26 --K-LG-----D-TYTCWYQKPGQSPLLVIYQDNK----RPSGIPERFSGS--NSGNTATLTIS-GTQALDEADYFCQ 88  
 AAP34742 26 SQS-VSS-----N-LAWYQKPGQAPRLLIYGAST----RATGIPARFSGG--GSGTEFTLTIS-SLQSEDFALYY-- 87  
 AAR84234 26 SQR-VSL-DSN-NKNYLAWYQHQPQAPRLLIYWAST----RESGVPDRFSGS--GSGTDFTLTIN-SPQAEDVAVYYCQ 95  
 AAT96436 26 SQS-IKS-----D-LAWYQKPGQAPRLVYVYGAST----RATGIPARFSGS--GSGTEFTLTIN-SMESEDFAVYY-- 87  
 AAW69188 26 SQS-VSN-----N-LVWYQKPGQAPRLLIYGAST----RATGIPARFSGS--GSGTEFTLTIS-SLQSEDFAVYY-- 87  
 CAG17618 26 SQS-VGS-----YLDWYQKPGQAPRLLIYDASN----RATGIPARFSGS--GSGTDFTLTIS-SLEPEDFAVYY-- 87  
 CAA06600 48 SDS-IGT-----N-LAWYQQRPGQAPRLVIFAAT----RASAPPRFSGG--GSGTEFTLTISIT-SLQPADVAVYY-- 109  
 ABA71387 26 SQN-ITT-----Y-LNWYQQRSGSAPKLLIYVSN----LQSGVPSRFSGS--GSGTDFTLTSS-SLQPEDFATYY-- 87  
 AAW69082 26 SQS-ISR-----H-LAWYQKPGQAPRLLIYGASN----RATGIPPRFSGS--GSGTEFTLTIS-SLQSEDFAVYY-- 87  
 ADU32643 26 SEG-ISS-----H-LAWYQQRPGQAPRLLIYGAST----RATGIPARFRGS--GSGTDFTLTIS-SVQSEDFAVYY-- 87  
 AAW69231 26 SQS-VST-----YLAWYQHKPGQAPRLLIYDASN----RATGIPARFSGS--GSGTDFTLTIS-SLEPEDFAVYY-- 87  
 ABA26240 26 SQS-VSS-----YLAWYQKPGQAPRLLIYDASN----RATGIPARFSGS--GSGTDFTLTIS-SLEPEDFAVYY-- 87  
 AAK94802 26 SQS-VSS-----YLAWYQKPGQAPRLLIYDASN----RATGIPARFSGS--GSGTDFTLTIS-SLEPEDFAVYY-- 87  
 AAT96434 26 SQS-VSS-----K-LAWYQKPGQAPRLLIYGAST----RATGIPARFSGS--GSGTEFTLTIS-SLQSEDFAVYY-- 87  
 BAC01828 49 GIN-VGT-----Y-R-IYWYQKPGSPQYLLRYSKSDSKQOQSGVPSRFSGSKDASANAGILLIS-GLQSEDEADYYCM 119  
 ABG38408 28 SQS-VSS-----YLAWYQKPGQAPRLLIYDASN----RAAGIPARFSGS--GSGTDFTLTIS-SLEPEDFAVYY-- 89  
 AAA36085 46 SQS-VSS-----SYLAWYQKPGQAPRLLIYGASS----RATGIPDRFSGS--GSGTDFTLTIS-RLEPEDFAVYY-- 108  
 AAO11855 41 SQS-IST-----W-LAWYQKPGKAPKILYKASI----LESGVPSRFSGS--GSGTEFTLTIS-SLQPDDFATYY-- 102  
 AAW69089 29 SRS-VAS-----YLAWYQKPGQAPRLLIYDAST----RAIGIPARFSGS--GSGTDFTLTIS-SLEPEDFAVYY-- 90  
 BAC01769 48 NSN-IEK-----N-D-VSWYQQPGAAPKLLISDTR----RPSGIPDRFSGSK--SGTSATLAI-GLQAEDEADYYCQ 112  
 AAC97100 26 SQD-ISN-----F-LAWFQKPGNAPKSLIYAASS----LQSGVPSKFSGS--GSGTNFTLTIS-SLQPEDFATYY-- 87

|          |    |                                                                                  |     |
|----------|----|----------------------------------------------------------------------------------|-----|
| AAO11857 | 41 | SQS-IGS-----Y-LNWXQKPKGKAPKVVIIYAANV----LQSGVPSRFSGS--GSGTDFTLTIS-SQPEDFATYY--   | 102 |
| ABA26089 | 26 | SQS-VSS-----YLAWYQKPGQAPRLLIYDASN----RATGIPARFSGS--GSGTDFTLTIS-SLEPEDFAVYY--     | 87  |
| CAA29935 | 46 | SQS-VSS-----SYLAWYQKPGQAPRLLIYGASS----RATGIPDRFSGS--GSGTDFTLTIS-RLEPEDFAVYY--    | 108 |
| BAC01802 | 48 | DV---GG-----K-S-LHWYQKPGQAPVLVVFDDRD----RPSGIPERFSGTN--SRDTAALTIS-RVEAGDEADYYCQ  | 110 |
| AAA69014 | 39 | SQS-ISS-----W-LAWYQKPKGKAPQLLMYKASS----LESGVPSRFSGS--GSGTEFTLTIS-SLHPDDFATYF--   | 100 |
| BAC01793 | 48 | AL---PK-----K-Y-AYWYQKSGQAPVLVIYEDSK----RPSGIPERFSGS--SGTMATLTIS-GAQVEDEADYYCY   | 110 |
| ABA26105 | 26 | SQS-VSS-----YLAWYQKPGQAPRLLIYDASN----RATGIPARFSGS--GSGTDFTLTIS-SLEPEDFAVYY--     | 87  |
| AAL96535 | 24 | SQS-VGS-----FLAWYQKPGQAPRLLIYDASN----RATGIPARFSGS--GSGTDFTLTIS-SLEPEDSAVYY--     | 85  |
| AAL37877 | 26 | SQN-IDS-----YLIWYQKPGQAPRLLIYDASN----RATGIPARFSGS--GSGTDFTLTIS-SLEPEDFAIYY--     | 87  |
| AA166630 | 28 | SQS-IST-----W-LAWYQKPKGKAPKLLIQTASR----LESGVPSRFSGS--GSETDFTLTIS-SLQPEDFATYY--   | 89  |
| ABC67110 | 28 | SQD-IST-----W-LAWYQKPKGKAPKLLISAAYT----LQSGVPSRFSGS--GSGTDFTLTIS-SLQPEDFATYY--   | 89  |
| AAH75843 | 45 | SSN-IGI-----N-Y-VYWYQKIPGTAPKLLISTNDQ----RPSGVPDRFSGS--KSGTSASLAIG-GLRSEDEAHYYCA | 109 |
| AAB26307 | 24 | SQS-VGT-----N-LAWYQKPGQAPRLLIFDAST----RDYIPDTFSGS--GSGTDFALTIS-SLQSEDFGFYY--     | 85  |
| AA166623 | 26 | SQS-VSS-----SYLAWYQKPGQAPRLLIYGASS----RATGIPDRFSGS--GSGTDFTLTIS-RLEPEDFAVYY--    | 88  |
| ABU90640 | 26 | NFN-VG-----R-NTVQWYQVPGSAPKLLIYADDQ----RLSGVPDRFSGS--KSGTSASLAIS-GLHSEDEAAYSCA   | 90  |
| AAA58972 | 39 | SQS-ISS-----W-LAWYQKPKGKAPKLLIYKASS----LESGVPSRFSGS--GSGTEFTLTIS-SLQPEDFATYY--   | 100 |
| ABA26202 | 26 | SQS-VRS-----NLAWYQKPGQAPRLLIYDASK----RATGIPARFSGS--GSGTDFTLTIS-RLEPEDFAVYY--     | 87  |
| AAW69048 | 26 | SRS-VAS-----YLAWYQKPGQAPRLLIYDAST----RAIGIPARFSGS--GSGTDFTLTIS-SLEPEDFAVYY--     | 87  |
| ABG38341 | 28 | SQS-VSS-----YLAWYQKPGQAPRLLIYDASN----RATGIPARFSGS--GSGTDFTLTIS-SLEPEDFAVYY--     | 89  |
| AAT96423 | 26 | SQS-VST-----YLAWYQKAGQAPRLLIYDASN----RATGIPARFSGS--GSGTDFTLTIS-SLEPEDFAVYY--     | 87  |
| AAW69233 | 26 | SQS-VTS-----N-LAWYQKPGQAPRLLIYVAST----RATGIPDRFSGS--GSGTEFTLTIS-SLQSEDFAVYY--    | 87  |
| AAW69044 | 26 | SHS-VSS-----YLAWYQKPGQAPRLLIYDAST----RATGIPARFSGS--GSGTDFTLTIS-SLEPEDFAVYY--     | 87  |
| ABA70846 | 26 | SQS-VSS-----SYLAWYQKPGQAPRLLIYGASR----RATGIPDRFSGS--GSGTVFTLTIS-RLEPEDFAVYY--    | 88  |
| AAA18820 | 26 | SQS-VSN-----N-LAWYQKSGQAPRLLIYGAST----RATGIPARFSGS--GSGTEFTLAIS-GLQSEDFAVYY--    | 87  |
| AAO22176 | 15 | SQS-ISG-----N-LNWXQLKPKGKAPPELLIYAASS----LQSGVPSRFSGT--ASGTDFAIIIS-SLQPEDFATYY-- | 76  |
| AAD16558 | 14 | SQS-VSS-----N-LAWYQKPGQAPRLLIYDAST----RATGIPARFSGS--GSGTEFTLTIS-SLQSEDFAVYY--    | 75  |
| ABG38361 | 26 | SQS-VSS-----YLAWYQKPGQAPRLLIYDASN----RATGIPARFSGS--GSGTDFTLTIS-SLEPEDFAVYY--     | 87  |
| JE0247   | 25 | --N-LG-----T-RNVHWYQKPGQAPVLVLYDYNV----RPSGIPERFSGS--NSVTAATLAIS-EVEAGDEADFYCW   | 87  |
| AAG43504 | 26 | SQS-VSR-----NLAWYQKPGQAPRLLIYDASN----RATGIPARFSGS--GSGTDFTLTIS-SLEPEDFAVYY--     | 87  |
| AAC41987 | 26 | SQS-VSS-----YLAWYQKPGQAPRLLIYDASN----RATGIPARFSGS--GSGTDFTLTIS-SLEPEDFAVYY--     | 87  |
| AAW69086 | 26 | SHS-VSS-----YLAWYQKPGQAPRLLIYDAST----RATGIPARFSGS--GSGTDFTLTVS-SLEPEDFAVYY--     | 87  |
| CAG27038 | 26 | SQD-ISN-----Y-LNWXQKPKGKAPKLLIYDASN----LETGVPSRFSGS--GSGTDFFTTIS-SLQPEDIATYY--   | 87  |
| 2107296A | 45 | SSD-VGS-----Y-NLWSWYQHPGKAPKLMIEGSK----RPSGVSIIRFSGS--KSGNTASLTIS-GLQAEDEADYYCC  | 110 |
| ABA70775 | 36 | SQS-ISS-----Y-LNWXQKPKGKAPKLLIYAASS----LQSGVPSRFSGS--GSGTDFTLTIS-SLQPEDFATYY--   | 97  |
| AAA72132 | 46 | SQS-IFY-ASN-NKDYLAWYQKPGQPPKLLIYWASA----RESGVPDRFSGG--GSGTDFTLTIS-SLQAEDEVAVYYCQ | 115 |
| BAA22186 | 28 | SQS-VGS-----YLAWYQKPGQAPRLLIYGASS----RATGIPDRFSGS--GSGTDFTLTIS-RLEPEDFAVYY--     | 89  |
| AAC99691 | 18 | SQS-VLY-SSN-NKNYLAWYQKLGQPPKLLIYWAST----RESGVPDRFSGS--GSGTNFTLTIS-SLQAEDEVAVYYCQ | 87  |
| ADT82679 | 26 | SQS-VSS-----YLAWYQKPGQAPRLLIYDASN----RATGIPARFSGS--GSGTDFTLTIS-SLEPEDFAVYY--     | 87  |
| AAZ09079 | 26 | SQS-VSS-----YLAWYQKPGQVPRLLIYDASN----RATGIPARFSGS--GSGTDFTLTIS-SLEPEDFAVYY--     | 87  |
| CAG27041 | 26 | SQD-IGN-----S-LNWXQKPKGKAPKLLIYDIFN----LETGVPSRFSGD--GSGTEFTTIS-SLQPEDFATYY--    | 87  |
| ABC66981 | 28 | SQS-ISS-----W-LAWYQKPKGKAPNLLIYWASS----LETGVPSRFSGS--GSGTEFTLTIS-SLQPEDFATYY--   | 89  |
| ACF34439 | 26 | SGP-IAS-----NYVQWYQQRPGSAPTTVIYEDNQ----RPSGVPRFSGSIDTSSNSASLTIS-GLKTEDEADYYCQ    | 92  |
| ABA26106 | 26 | SQS-VSS-----YLAWYQKPGQAPRLLIYDASN----RATGIPARFSGS--GSGTDFTLTIS-SLEPEDFAVYY--     | 87  |
| S25753   | 45 | --K-LG-----D-KYSSWYQKPGQSPLLVLYQDNT----RPSGIPERFSGS--NSGNTATLTIS-ETQAMDEGDYYCQ   | 107 |
| AAA16949 | 26 | SQS-VSS-----N-LAWYQKPGQAPRLLIYGAST----RATGIPARFSGS--GSGTEFTLTIS-SLQSEDFAVYY--    | 87  |
| 752399A  | 26 | SSD-VGA-----Y-NSVSWYQHPGKAPKLMIFDVTK----RPSGVPDRLSGS--KSGDTASLTIS-GLRADDEADYYCC  | 91  |
| ABA26087 | 25 | SQS-VSS-----YLAWYQKPGQAPRLLIYDASN----RATGIPARFSGS--GSGTDFTLTIS-SLEPEDFAVYY--     | 86  |

|          |    |                                                                                   |     |
|----------|----|-----------------------------------------------------------------------------------|-----|
| AAW69075 | 26 | SRS-VAS-----YLAWYQOKPGQAPRLLIYDAST----RAIGIPARFSGS--GSGTDFTLTIS-SLEPEDFAVYY--     | 87  |
| BAC01825 | 49 | DVN-VGT-----Y-K-IYWYQOKPGSPPPQYLLRYNSDSKQGGSGVPSRFSKGDASANAGVLLIS-GLQSEDEADYYCM   | 119 |
| AAZ09128 | 22 | SQS-VSS-----YLAWYQOKPGQAPRLLIYDASN----RATGIPARFSGS--GSGTDFTLTIS-SLEPEDFAVYY--     | 83  |
| AAQ55271 | 24 | SQR-VSG-----N-VVWYRQKPGQSPRLLIYAASST----RASGVPARFSGS--GSGTDFNLTIN-SLQSDDIADVYY--  | 85  |
| ACR16321 | 26 | SQS-VSS-----N-LAWYQOKPGQAPRLLIYGAST----RATGIPARFSGS--GSGTEFTLTIS-SLQSEDFAVYY--    | 87  |
| AAH73795 | 45 | SSN-IGA-----N-N-VNWYQQLPGTAPKLLIHTTNQ----RPSGVPERFSGS--KSGPSASLVIS-GLQSEDEAEYYCA  | 109 |
| AAB53471 | 26 | SQS-ISS-----S-LAWYQOKPGQAPRLLIYGASS----LQSDVPARFSGS--GSGTDFTLTIS-SLQSEDFATYY--    | 87  |
| ABG38377 | 26 | SQR-VSS-----YLAWYQOKPGQAPRLLIYDASN----RATGIPARFSGS--GSGTDFTLTIS-SLEPEDFAVYY--     | 87  |
| AAL96537 | 24 | SQS-VSS-----YLAWYQOKPGQAPRLLIYDASN----RATGIPARFSGS--GSGTDFTLTIS-SLEPEDFAVYY--     | 85  |
| AAC08337 | 26 | SQS-VSS-----YLAWYQOKPGQAPRLLIYDASN----RATGIPARFSGS--GSGTDFTLTIS-SLEPEDFAVYY--     | 87  |
| AAB84164 | 23 | SQS-VST-----FLAWYQOKPGQAPRLLIYDAST----RATGIPARFSGS--GSGTDFTLTIS-SLEPEDFAVYY--     | 84  |
| AAD56265 | 26 | SQS-ISS-----N-LAWYQOKPGQAPRLLIYGAST----RATGIPARFSGS--GSGTEFTLTIS-SLQSEDFAIYH--    | 87  |
| AAD19449 | 24 | SQS-VSF-----N-LAWYQOKPGQAPRLLIFGAST----RATGIPARFSGS--GSGTEFTLTIF-SLQSEDFAVYY--    | 85  |
| CAB44484 | 22 | SQS-VNN-----N-FAWYQOKPGQAPRLLIYGAST----RATGIPARFSGS--GSGTEFTLTIS-SLQSEDFAVYY--    | 83  |
| BAC01851 | 49 | GIN-VGT-----Y-R-IYWYQOKPGSPPPQYLLRYKSDSKQGGSGVPSRFSKGDASANAGILLIS-GLQSEDEADYYCM   | 119 |
| ADT82680 | 26 | SQS-VSS-----YLAWYQOKPGQAPRLLIYDASN----RATGIPARFSGS--GSGTDFTLTIS-SLEPEDFAVYY--     | 87  |
| ABA70793 | 30 | SQS-ISS-----W-LAWYQOKPGKAPKLLIYKASS----LESGVPSRFSGS--GSGTEFTLTIS-SLPDDFATYY--     | 91  |
| AAV16609 | 26 | SQS-VLY-SSN-NKNYLAWYQOKPGQPPKLLIYWAST----RESGVPDFRSGS--GSGTDFTLTIS-SLQAEADVAVYYCQ | 95  |
| S25750   | 45 | SSN-IG-----T-NDVYWYQQLTGTAPKLLIYRNNQ----RPSGVPDFRSGS--KSGSSASLAIS-GLQSEDEADYYCA   | 109 |
